# Supplementary material for: Highly potent and selective phosphatidylinositol 4-kinase IIIβ inhibitors as broad-spectrum anti-rhinoviral agents
Source: Royal Society of Chemistry journal article supplement (doi:10.1039/d3md00630a), 2023-12-21
Supplement: d3md00630a1.pdf [file d3md00630a1.pdf]

## **Supporting Information**

### ***Highly potent and selective phosphatidylinositol 4-kinase III $\beta$ inhibitors as broad-spectrum anti-rhinoviral agents***

Avinash G Vishakantegowda<sup>a,b,1</sup>, Dasom Hwang<sup>a,c,1</sup>, Prashant Chakrasali<sup>a</sup>, Eunhye Jung<sup>a</sup>, Joo-Youn Lee<sup>a</sup>, Jin Soo Shin<sup>a,\*</sup>, Young-Sik Jung<sup>a,b,\*</sup>

<sup>a</sup> Infectious Diseases Therapeutic Research Center, Korea Research Institute of Chemical Technology, Daejeon 34114, Republic of Korea

<sup>b</sup> Department of Medicinal Chemistry and Pharmacology, University of Science and Technology, Daejeon 34113, Republic of Korea

<sup>c</sup> Laboratory of Veterinary Virology, College of Veterinary Medicine, Chungbuk National University, Cheongju 28644, Republic of Korea

\* Corresponding authors:

Young-Sik Jung (ysjung@kriict.re.kr), Jin Soo Shin (jsshin@kriict.re.kr)

<sup>1</sup> These authors contributed equally to this work.

|                                                                 |           |
|-----------------------------------------------------------------|-----------|
| <b>Spectral Copies of <sup>1</sup>H NMR of Compounds .....</b>  | <b>S1</b> |
| <b>Spectral Copies of <sup>13</sup>C NMR of Compounds .....</b> | <b>S2</b> |
| <b>Spectral Copies of HRMS of Compounds .....</b>               | <b>S3</b> |
| <b>Antiviral activity of 7f against coronavirus .....</b>       | <b>S4</b> |
| <b>Kinase Assay.....</b>                                        | <b>S5</b> |
| <b>Kinase Panel Assay .....</b>                                 | <b>S6</b> |

---

*Abbreviations:* hRVs, human rhinoviruses; PI4KIII $\beta$ , phosphatidylinositol-4-kinase III $\beta$ ; EC<sub>50</sub>, 50% effective concentration; CC<sub>50</sub>, 50% cytotoxic concentration; SI, selectivity index; MOI, multiplicity of infection; SD, standard deviation; DMEM, Dulbecco's modified eagle's medium; TCID<sub>50</sub>, 50% tissue culture infectious dose

# S1. Spectral Copies of <sup>1</sup>H NMR of Compounds

<sup>1</sup>H NMR spectrum of 2 (KR-27282)

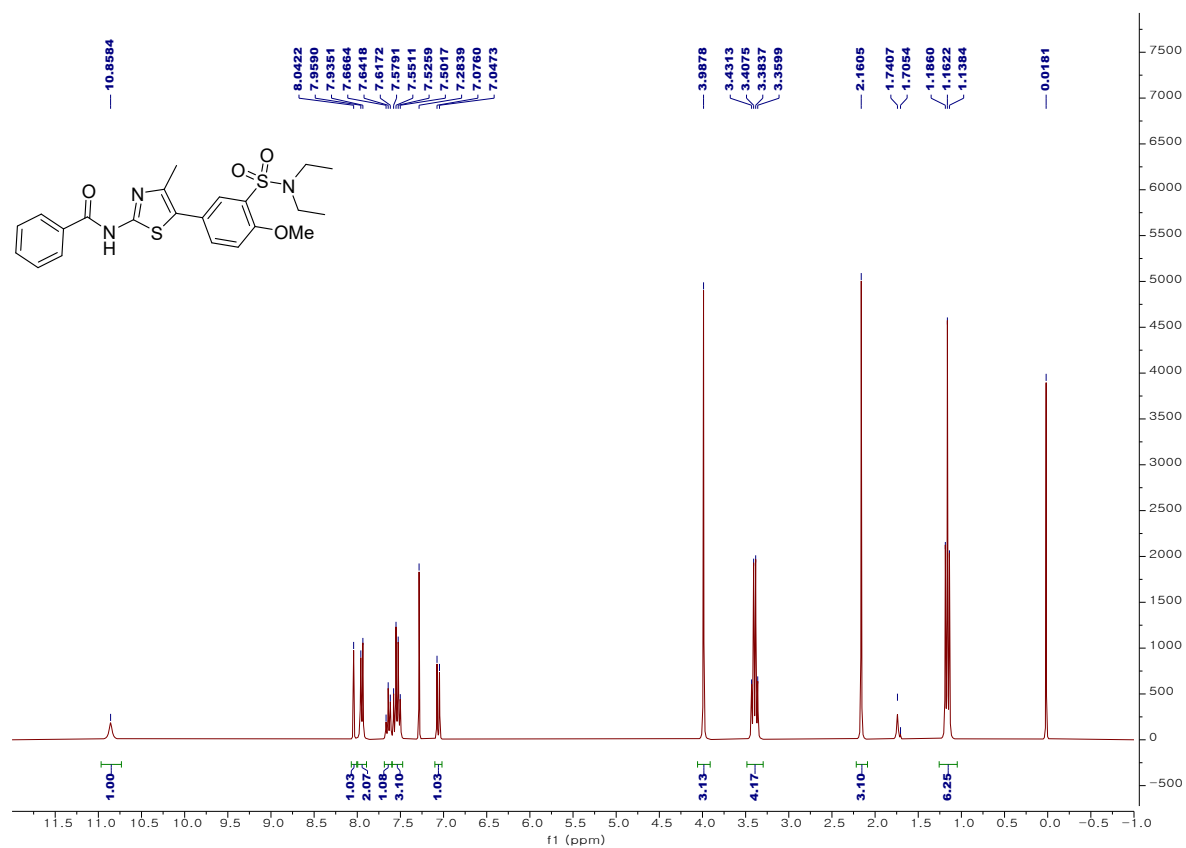

<sup>1</sup>H NMR spectrum of **3** (KR-27222)

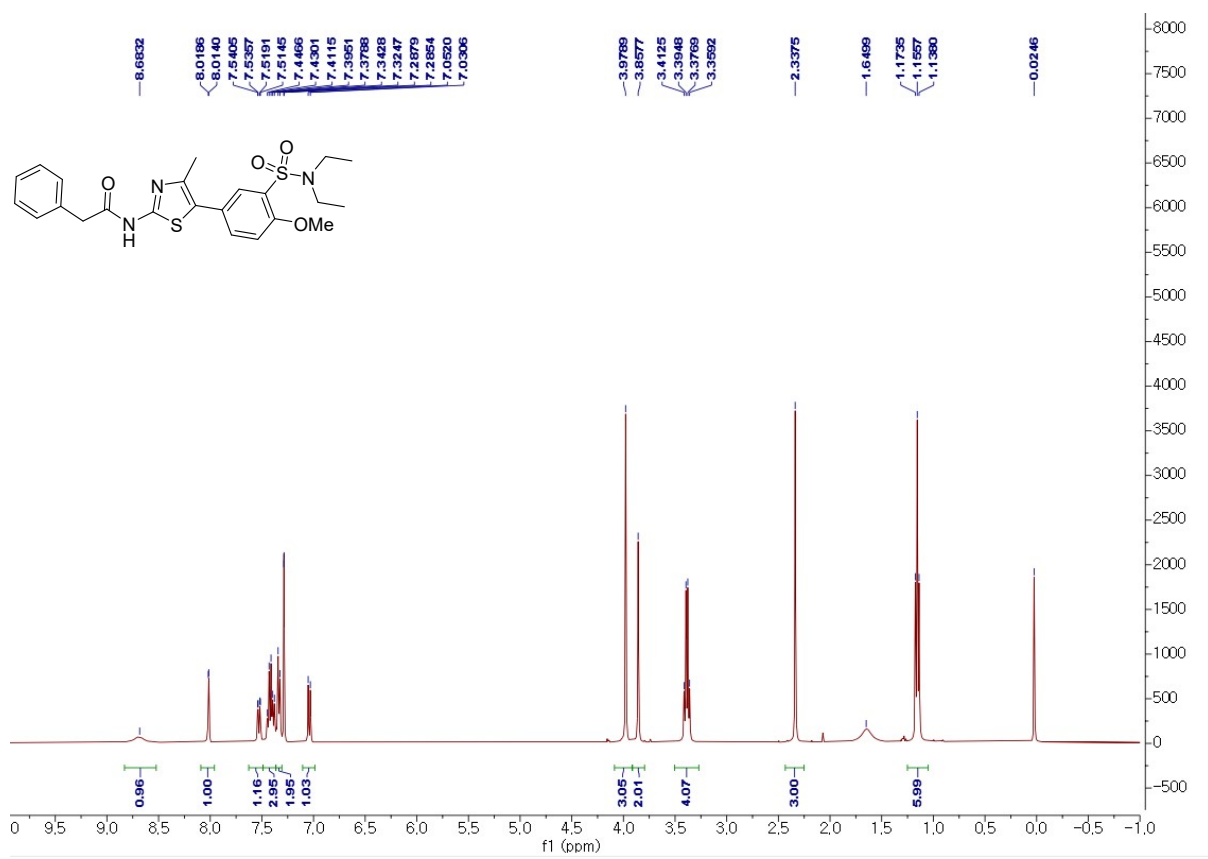

<sup>1</sup>H NMR spectrum of 4 (KR-27223)

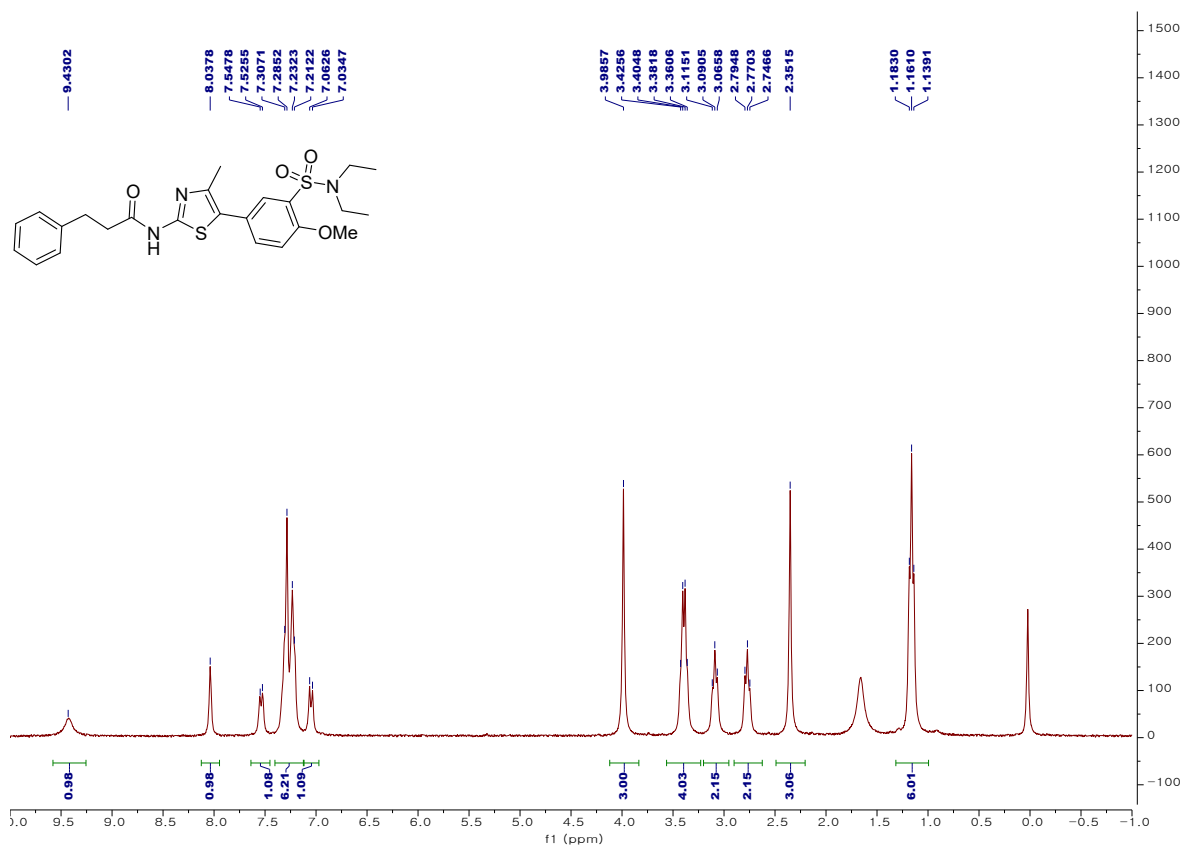

<sup>1</sup>H NMR spectrum of **5a** (KR-27320)

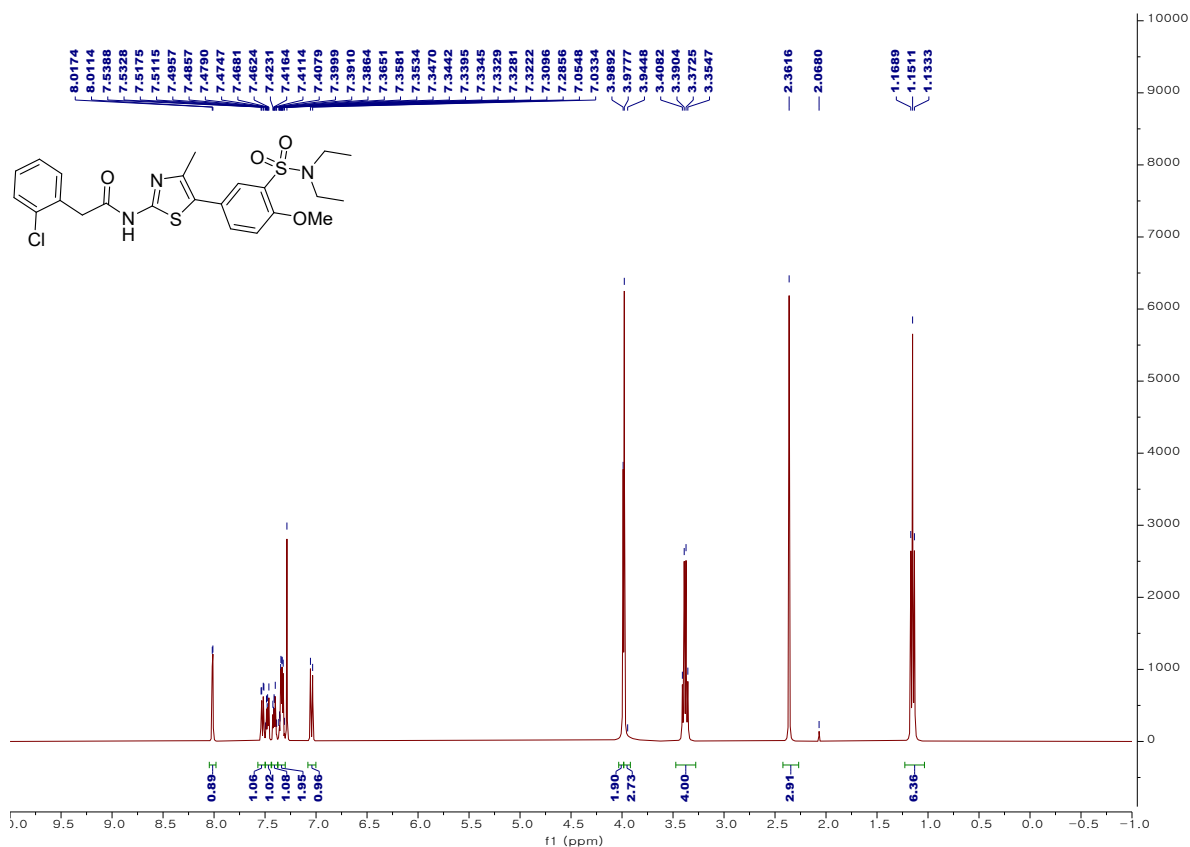

# <sup>1</sup>H NMR spectrum of 5b (KR-27287)

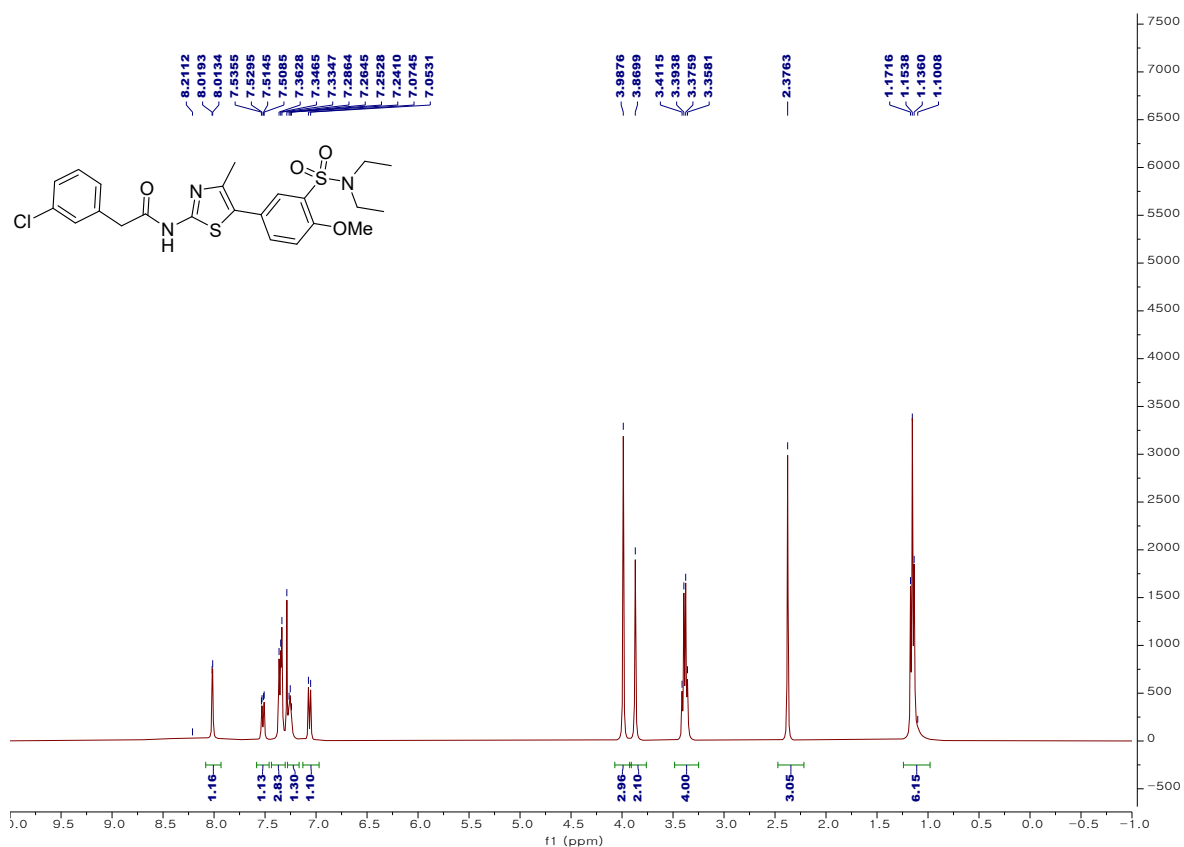

<sup>1</sup>H NMR spectrum of **5c** (KR-27292)

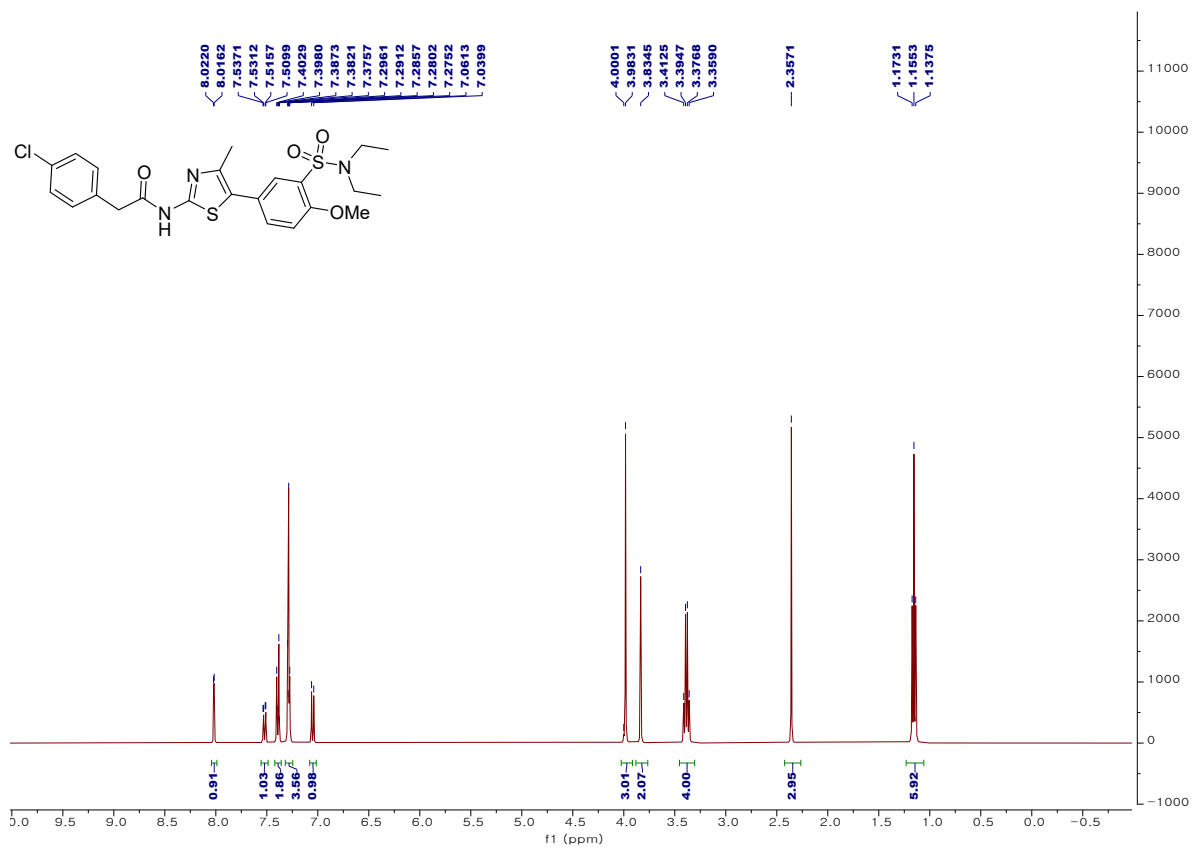

# <sup>1</sup>H NMR spectrum of **5d** (KR-27288)

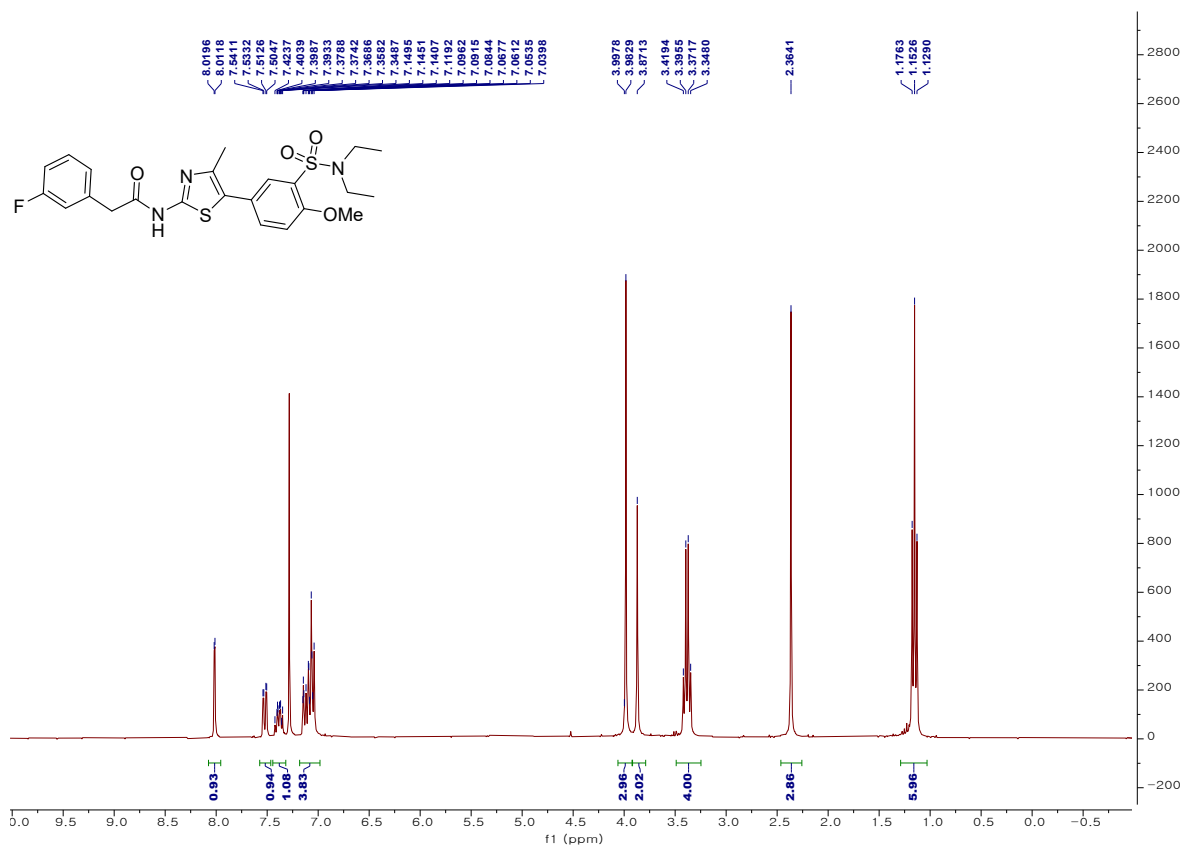



<sup>1</sup>H NMR spectrum of **5e** (KR-27289)

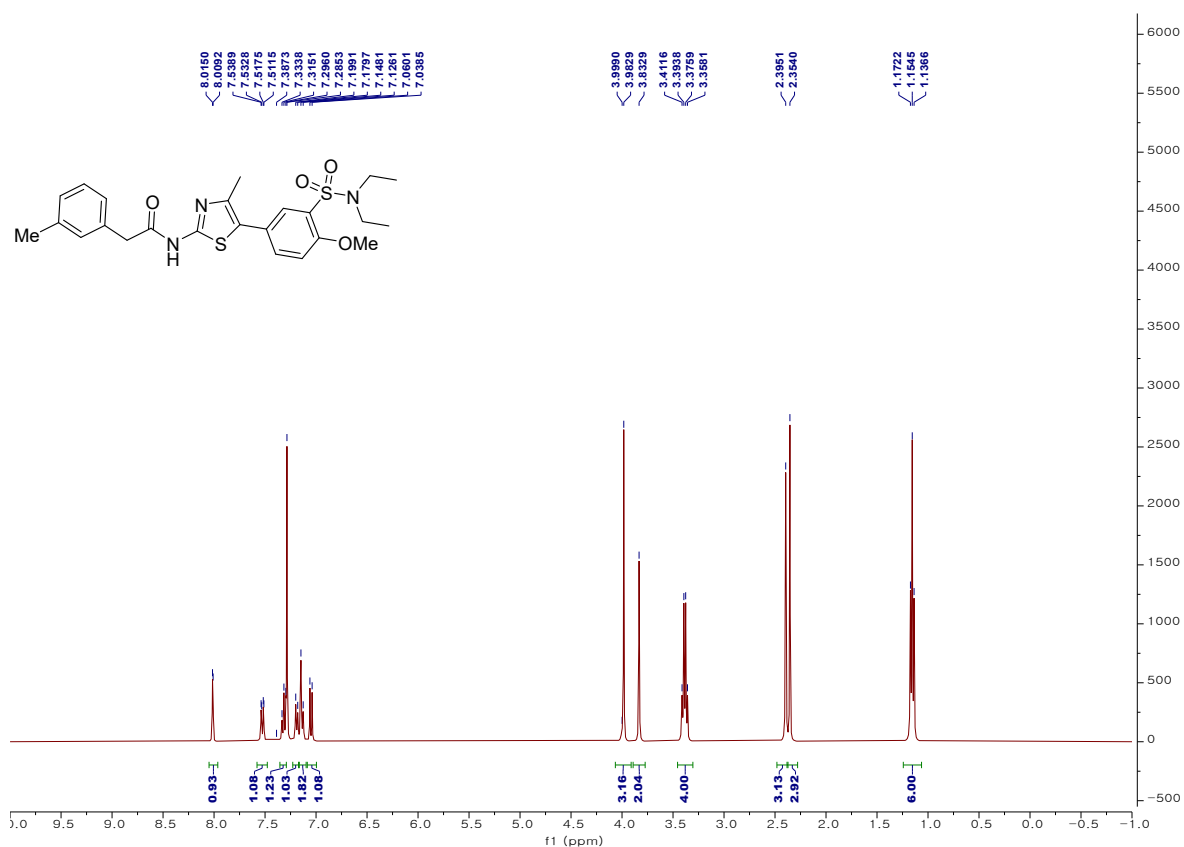

<sup>1</sup>H NMR spectrum of 5f (KR-27357)

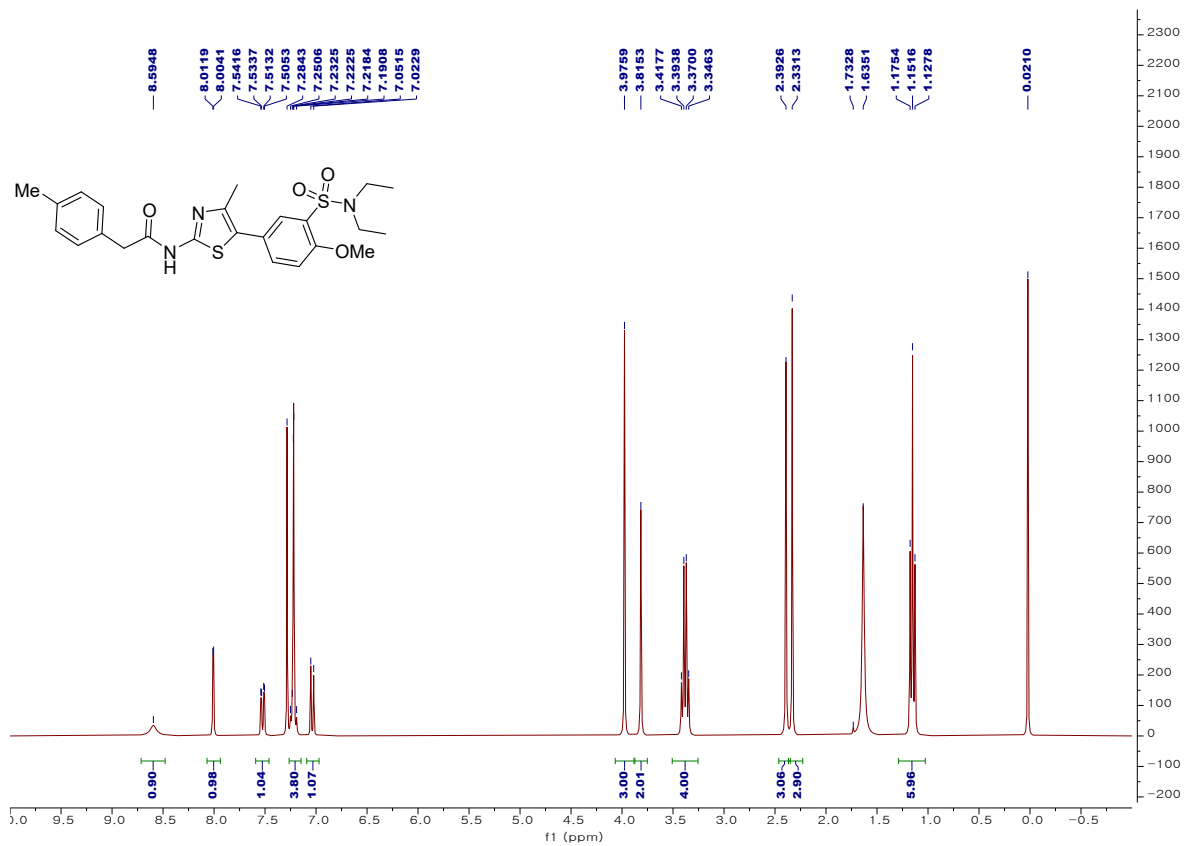

<sup>1</sup>H NMR spectrum of 5g (KR-27319)

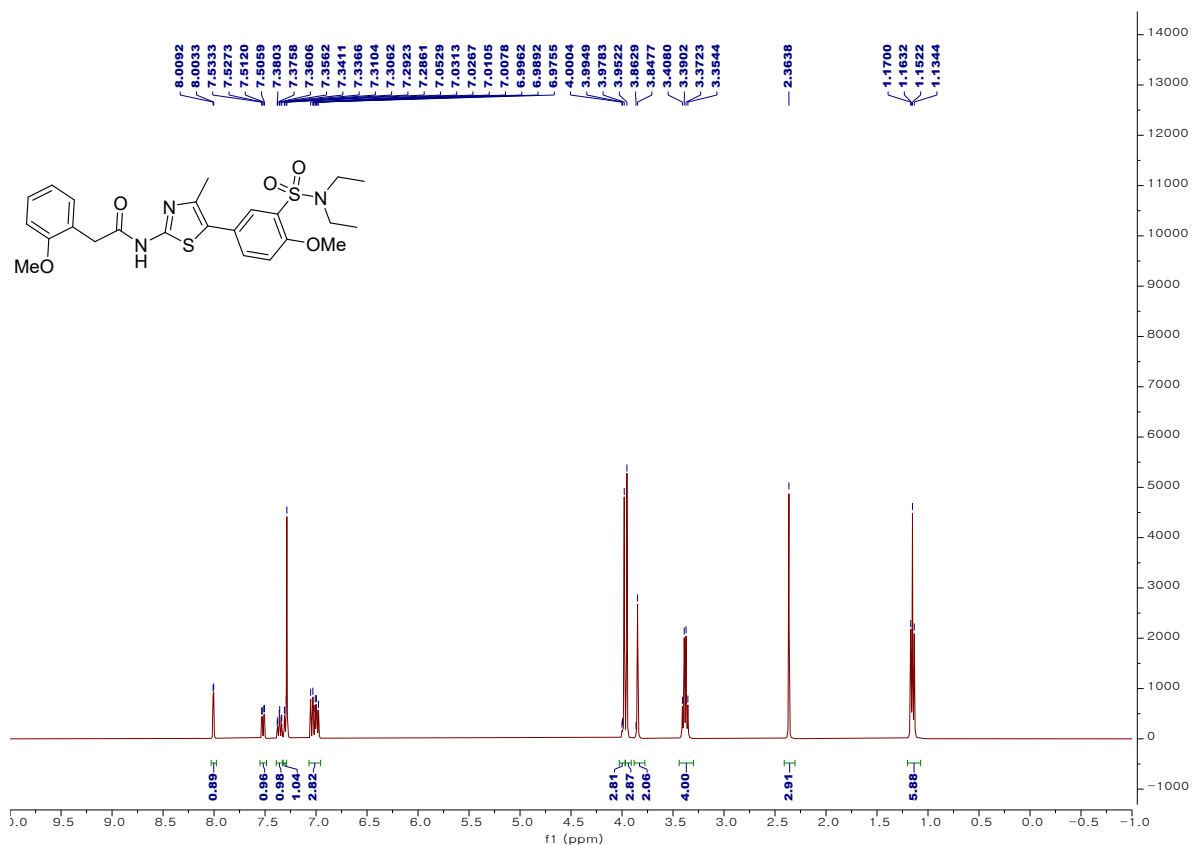

<sup>1</sup>H NMR spectrum of **5h** (KR-27291)

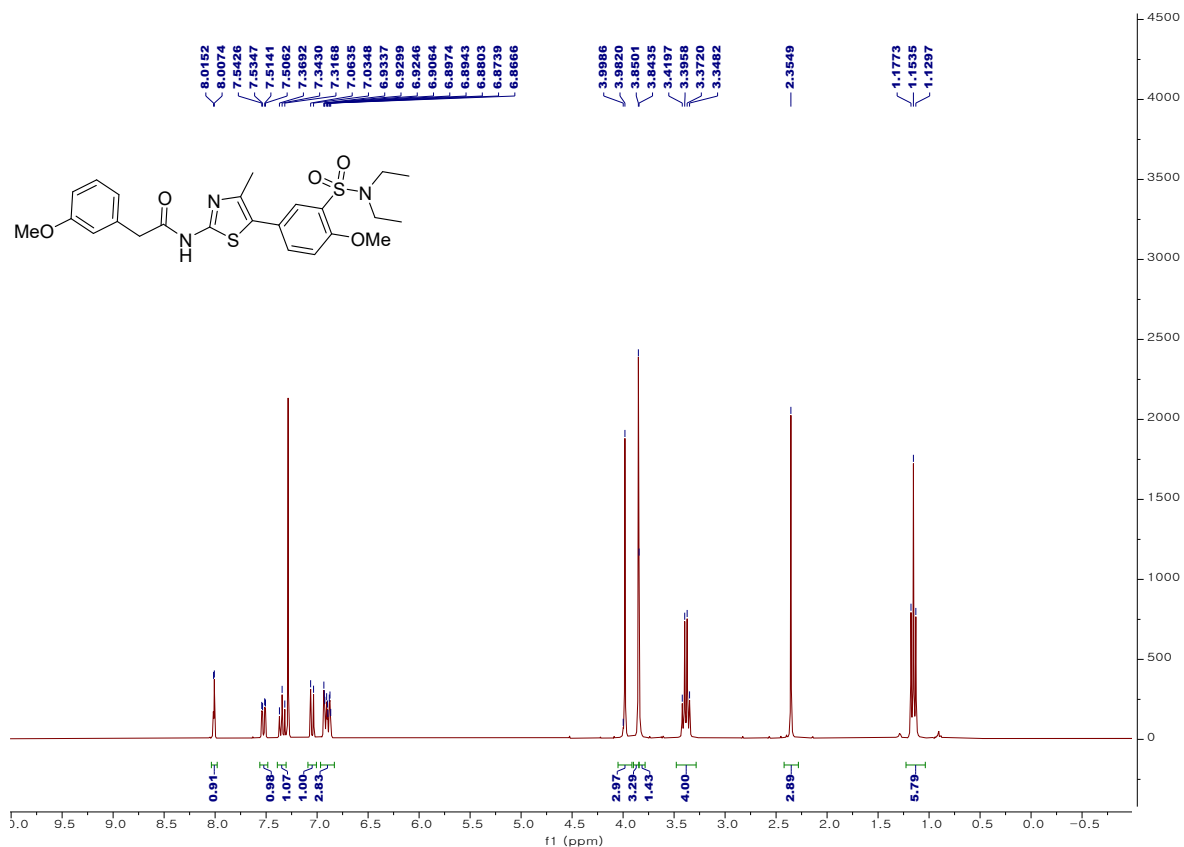

# <sup>1</sup>H NMR spectrum of **5i** (KR-27318)

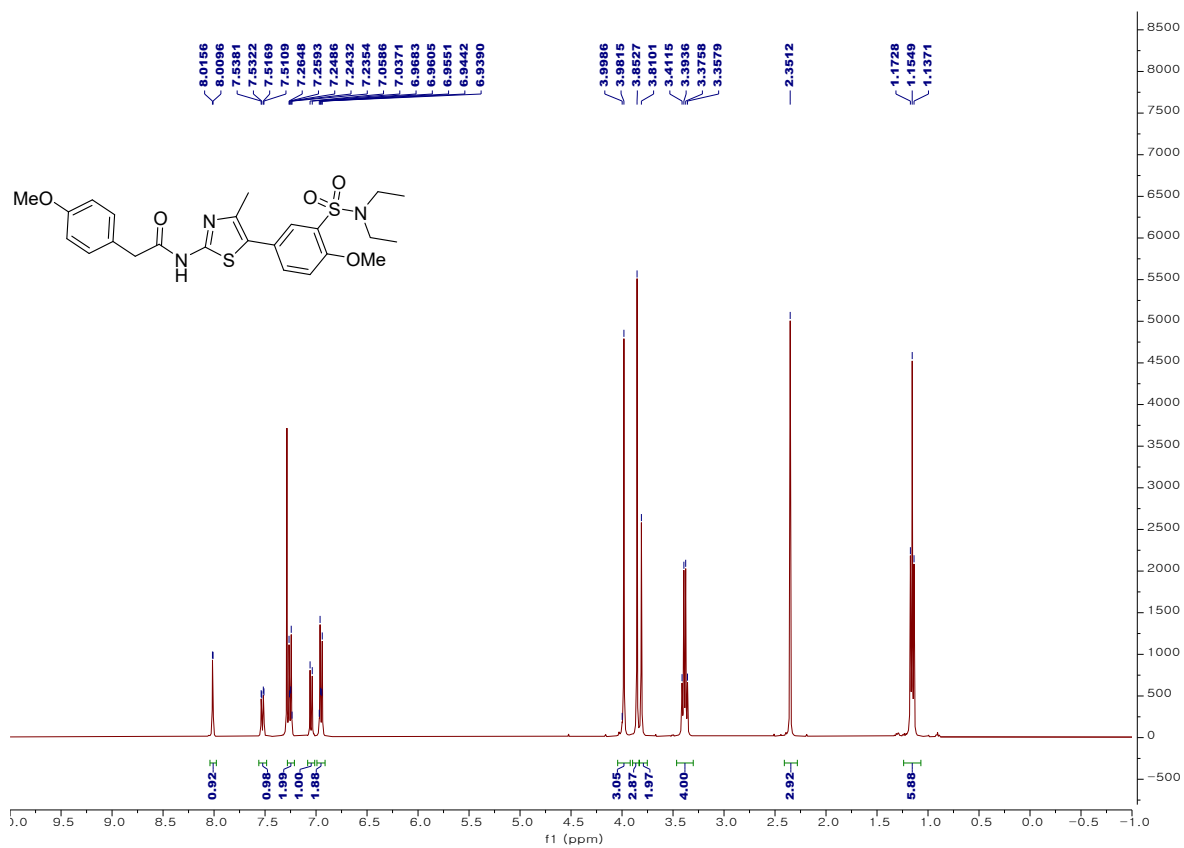

<sup>1</sup>H NMR spectrum of **5j** (KR-27321)

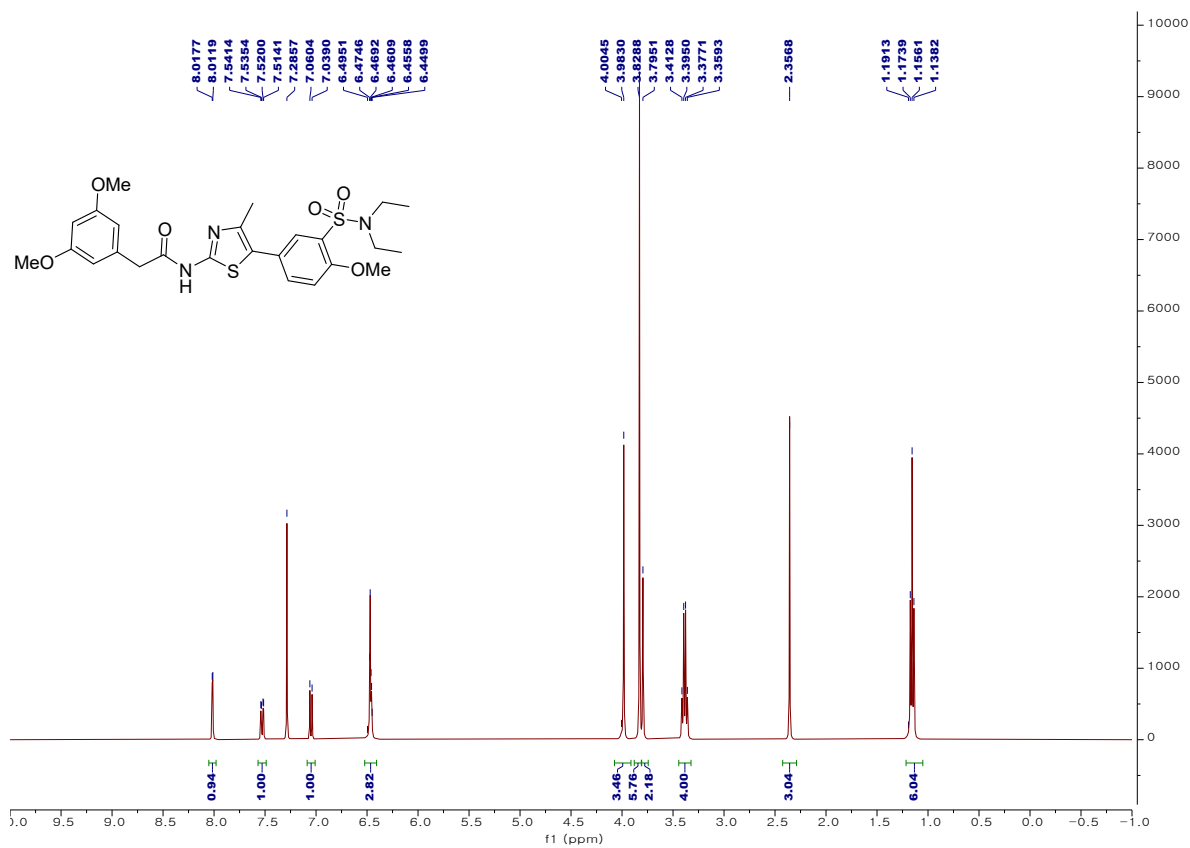

<sup>1</sup>H NMR spectrum of **5k** (KR-27356)

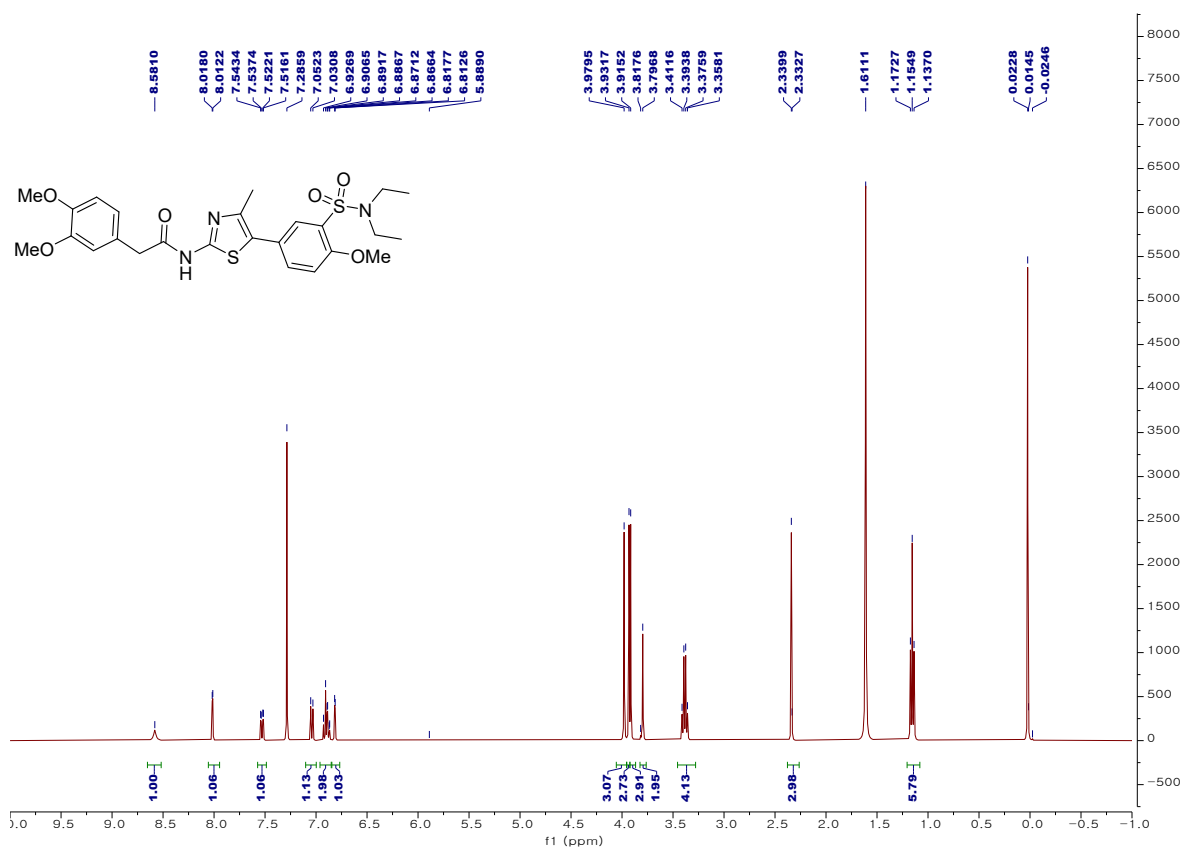

<sup>1</sup>H NMR spectrum of **51** (KR-27358)

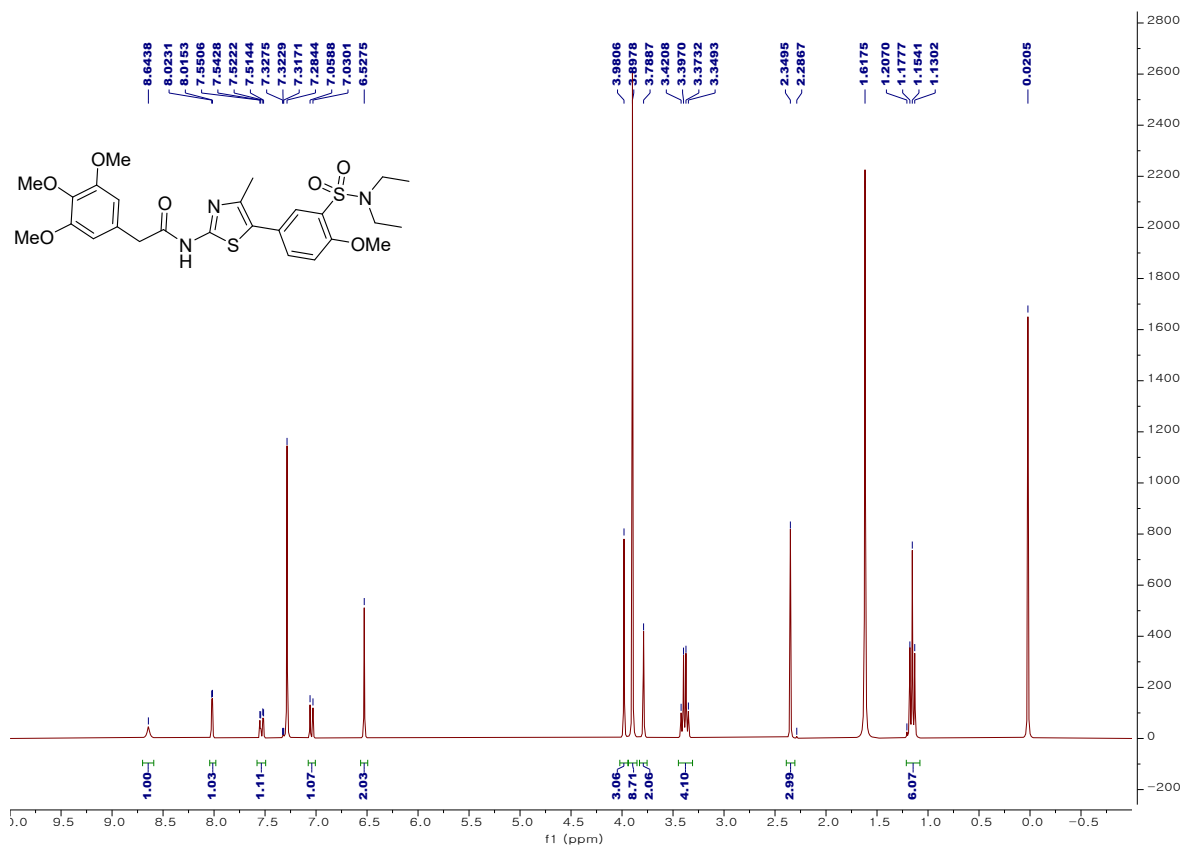



<sup>1</sup>H NMR spectrum of **6** (KR-27335)

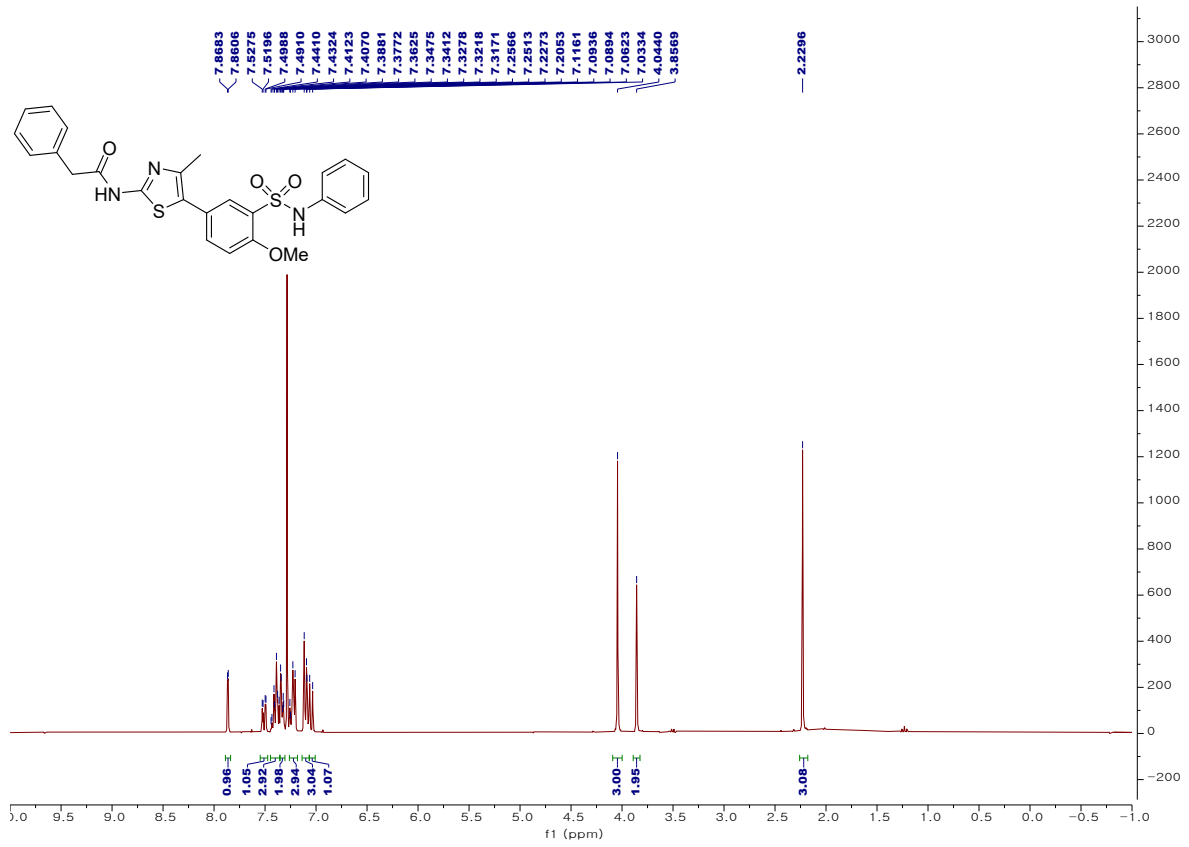

<sup>1</sup>H NMR spectrum of 7a (KR-27336)

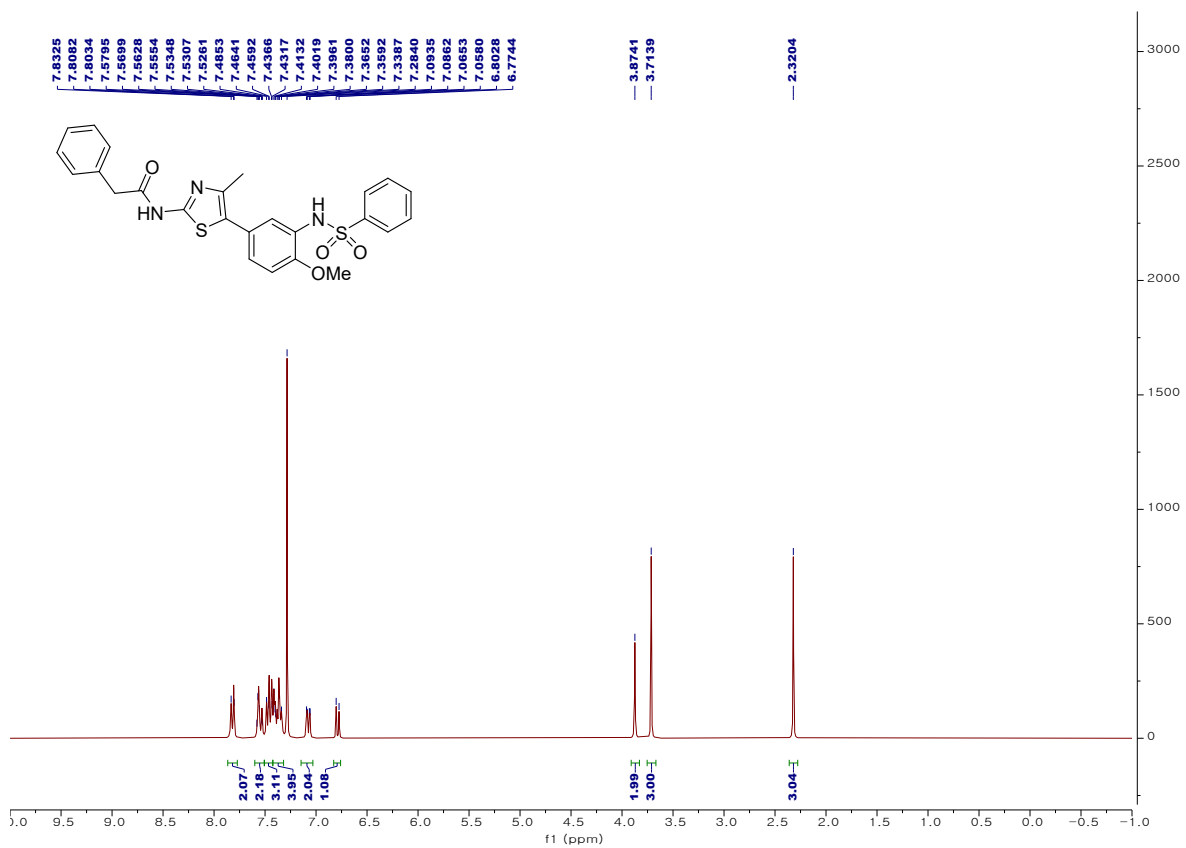

<sup>1</sup>H NMR spectrum of **7b** (KR-27376)

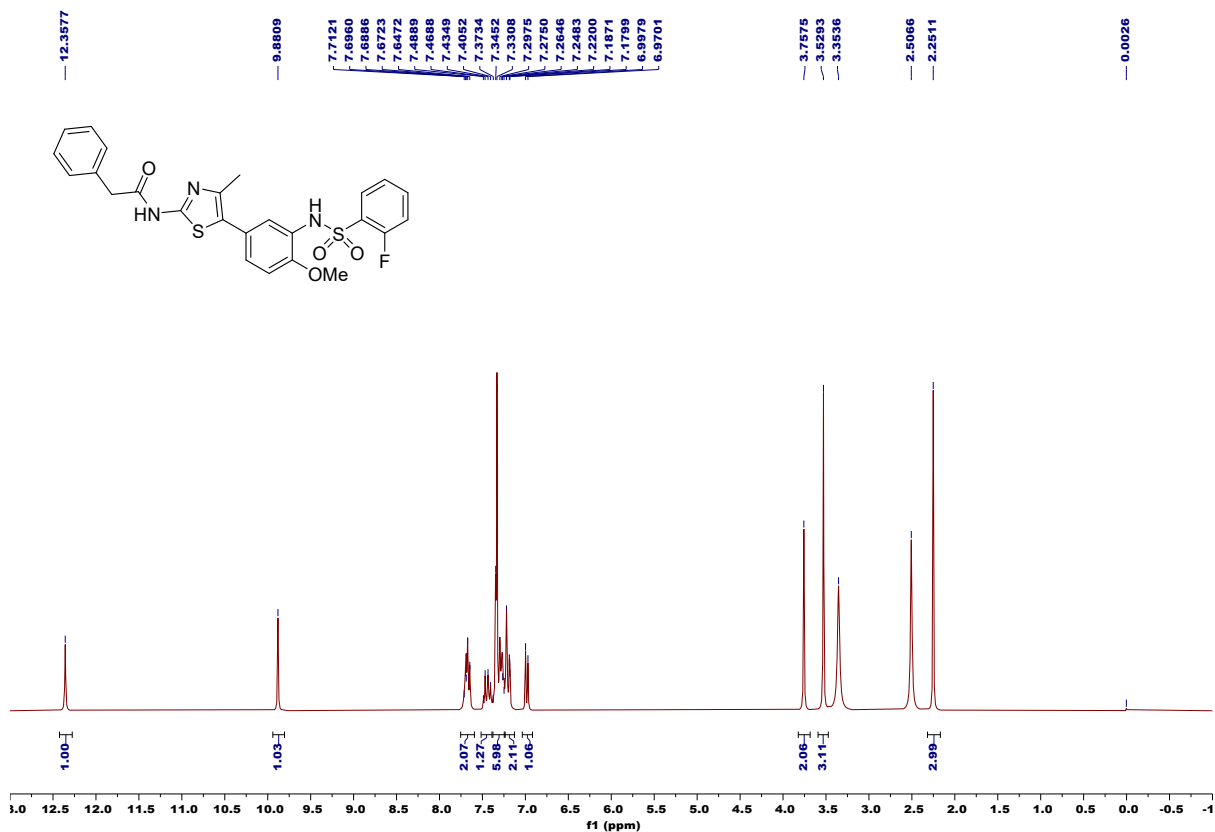

<sup>1</sup>H NMR spectrum of 7c (KR-27377)

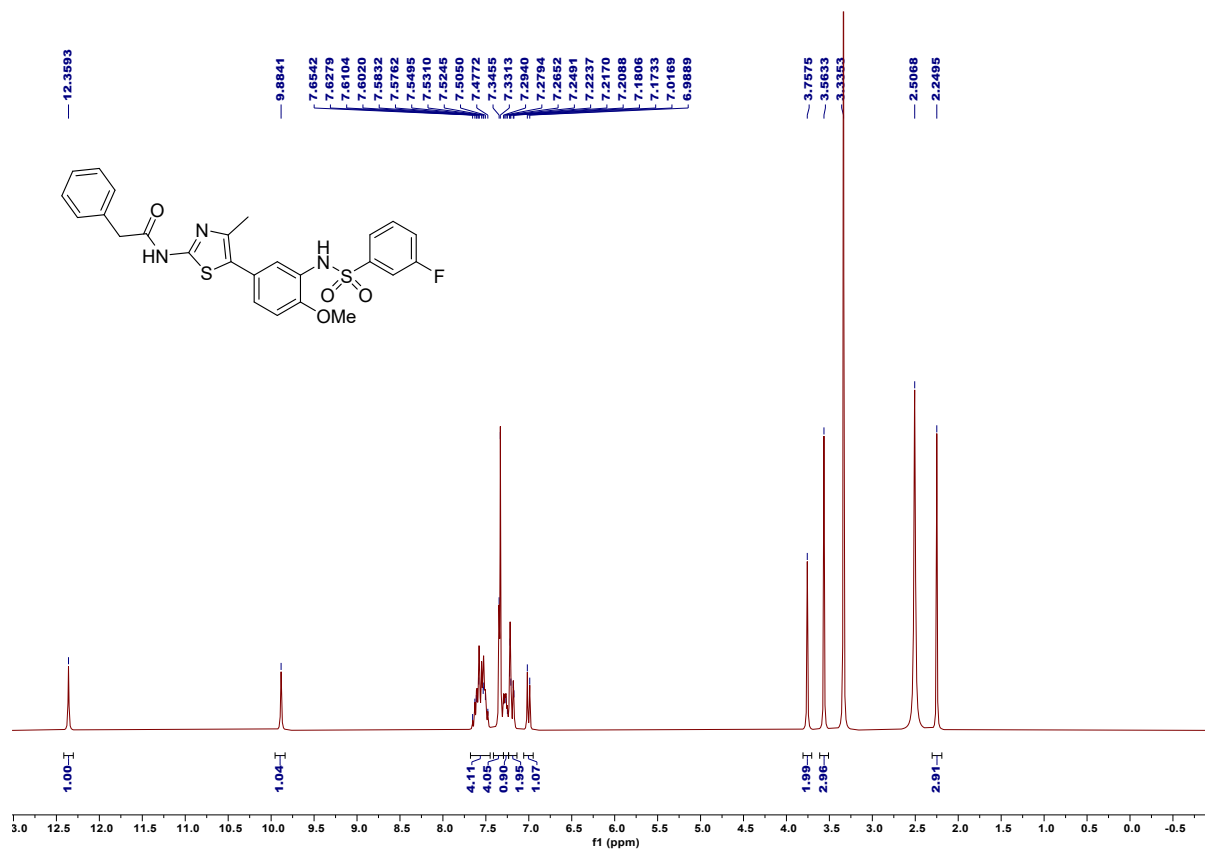

<sup>1</sup>H NMR spectrum of **7d** (KR-27374)

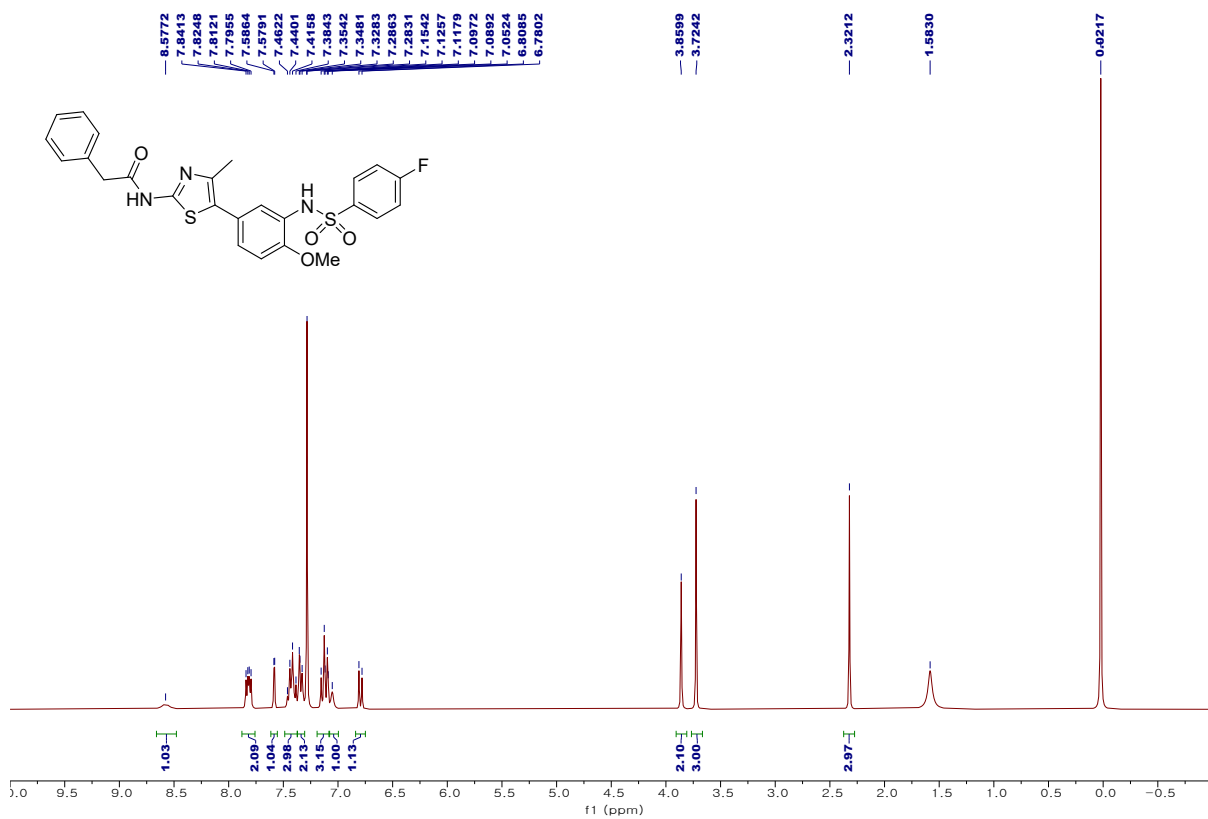

<sup>1</sup>H NMR spectrum of 7e (KR-27375)

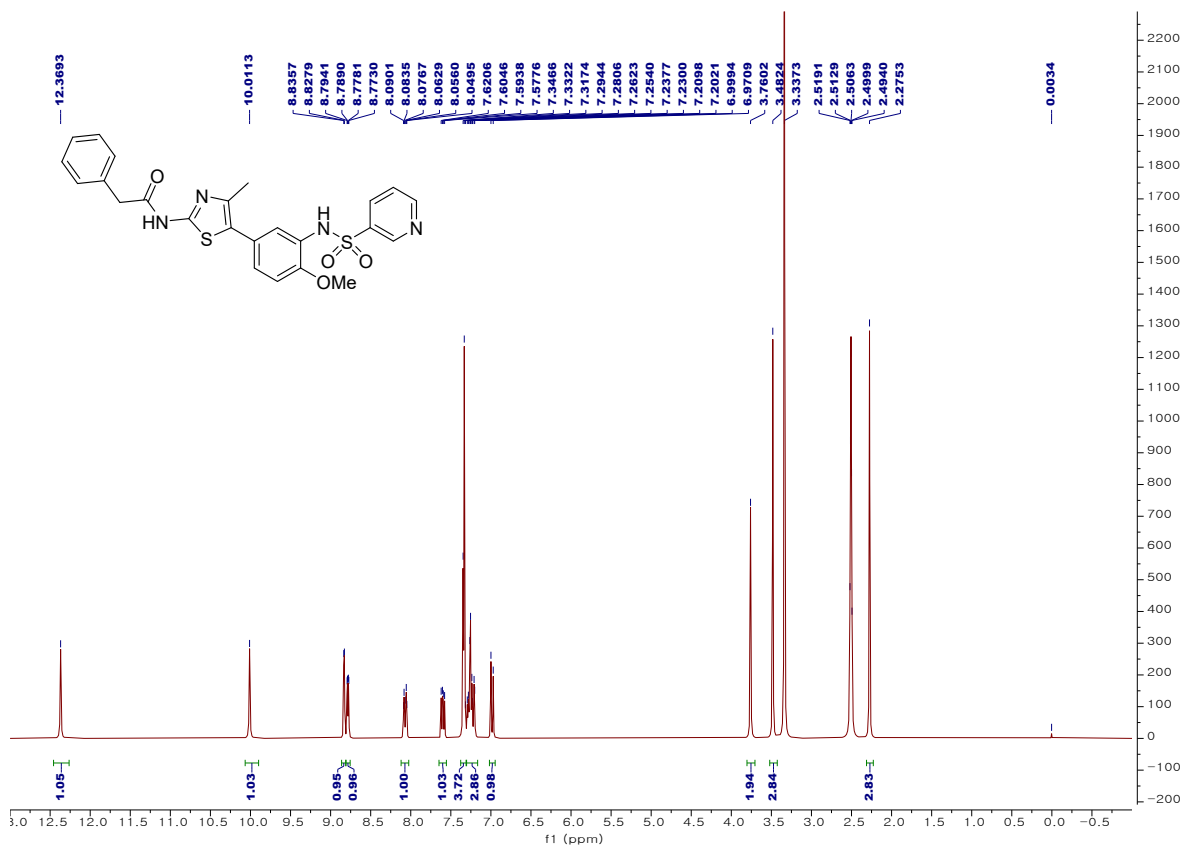

<sup>1</sup>H NMR spectrum of 7f (KR-27370)

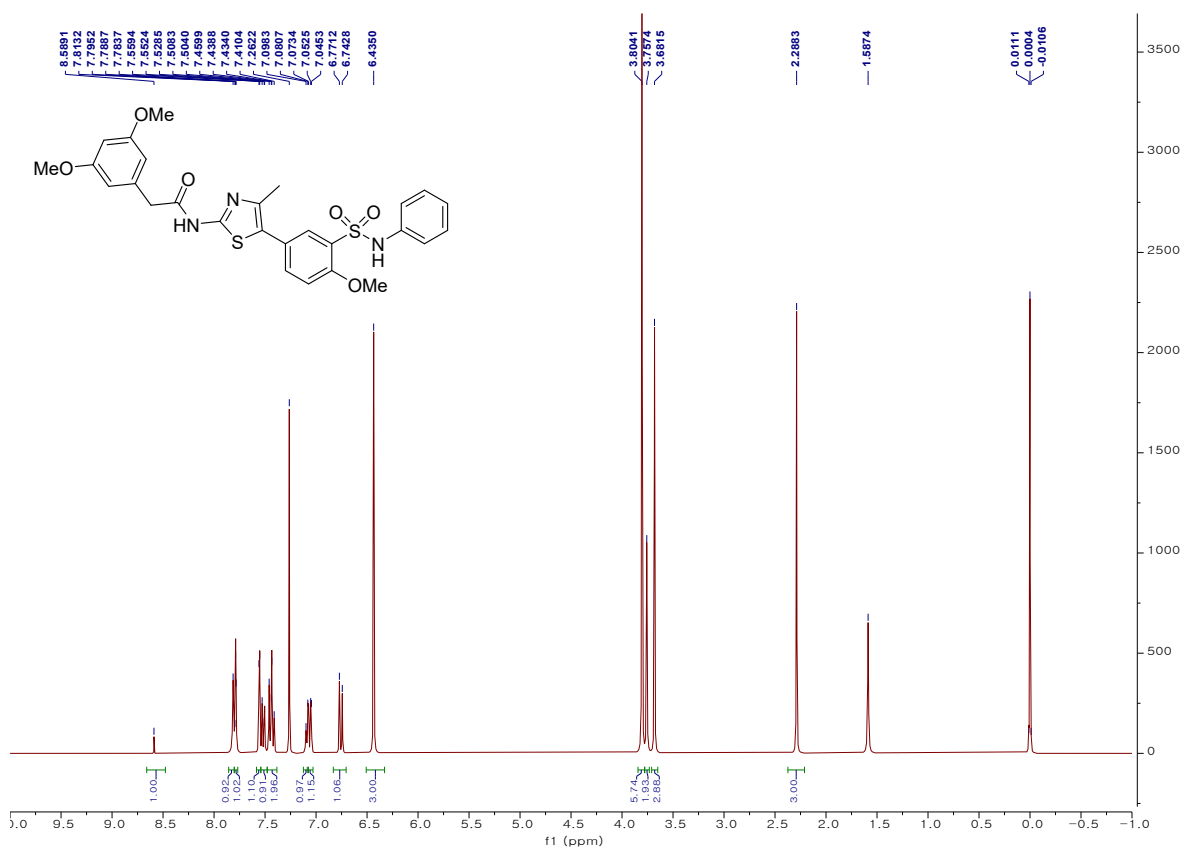

## S2. Spectral Copies of <sup>13</sup>C NMR of Compounds

<sup>13</sup>C NMR spectrum of 2 (KR-27282)

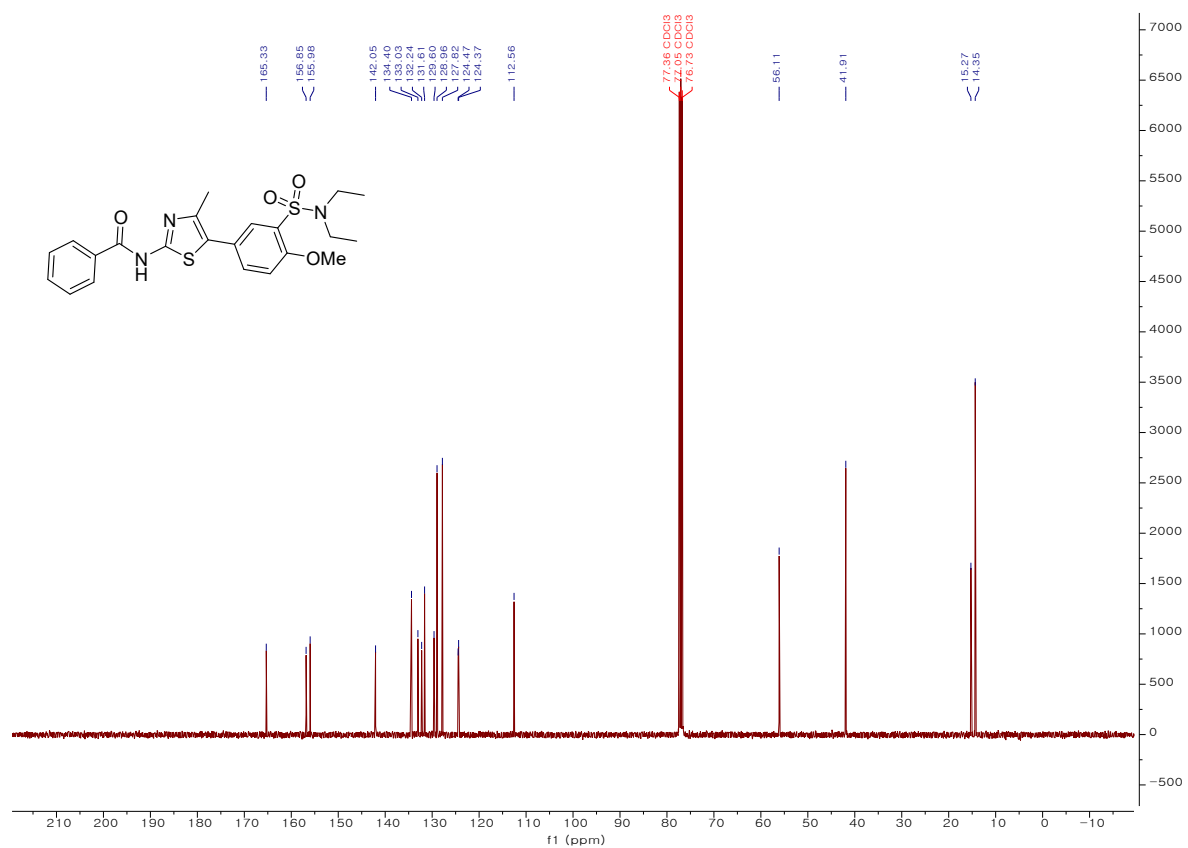



# 13C NMR spectrum of 3 (KR-27222)

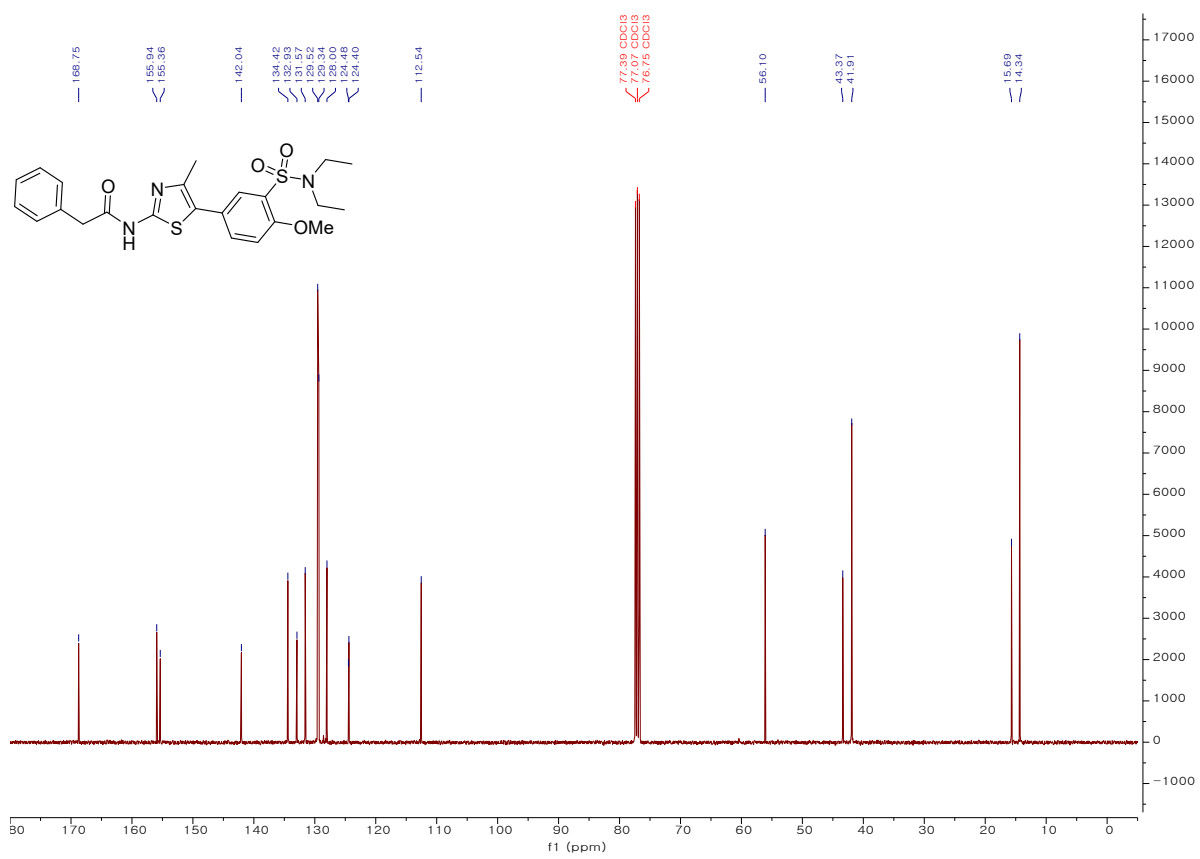

168.75

155.94  
155.36

142.04

134.42  
132.93  
131.67  
129.34  
128.00  
124.48  
124.10

112.54

77.39 CDCl3  
77.07 CDCl3  
76.75 CDCl3

56.10

43.37  
41.91

15.68  
14.34

180 170 160 150 140 130 120 110 100 90 80 70 60 50 40 30 20 10 0

f1 (ppm)

# 13C NMR spectrum of 4 (KR-27223)

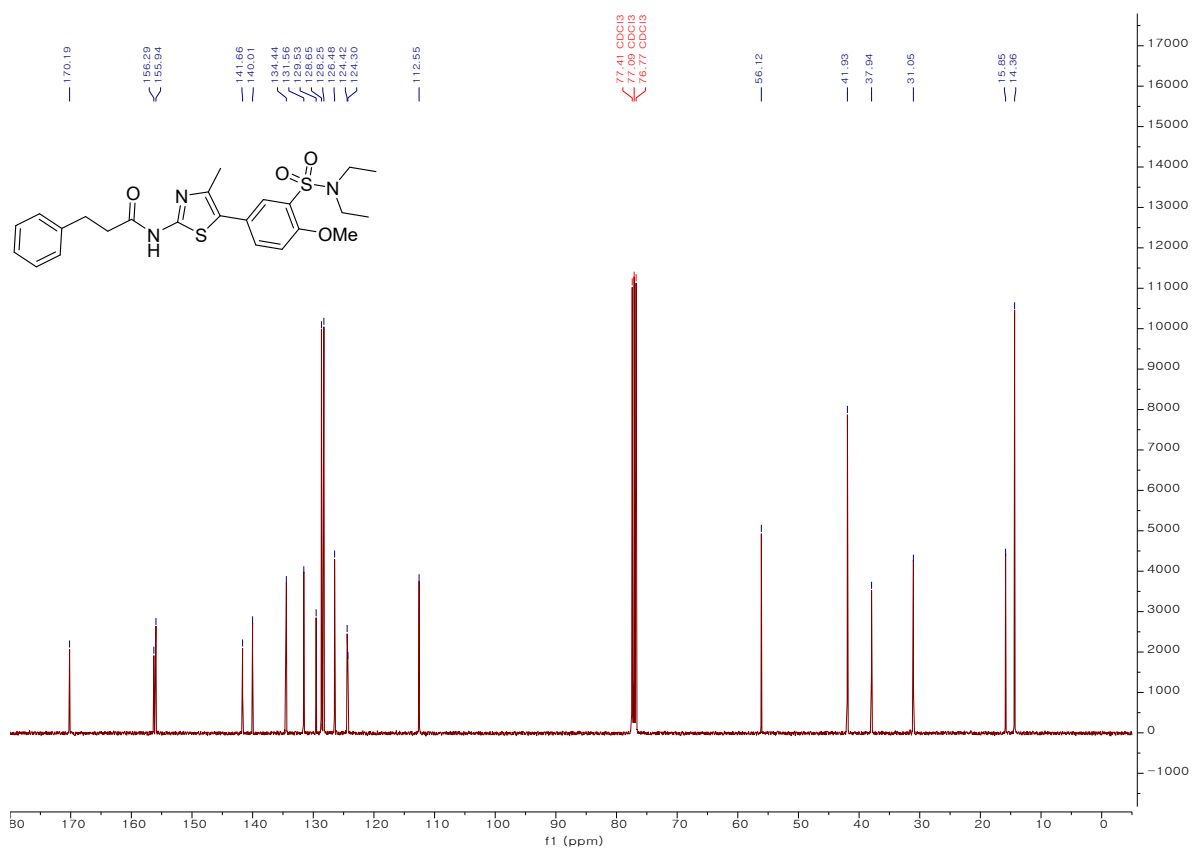

# <sup>13</sup>C NMR spectrum of 5a (KR-27320)

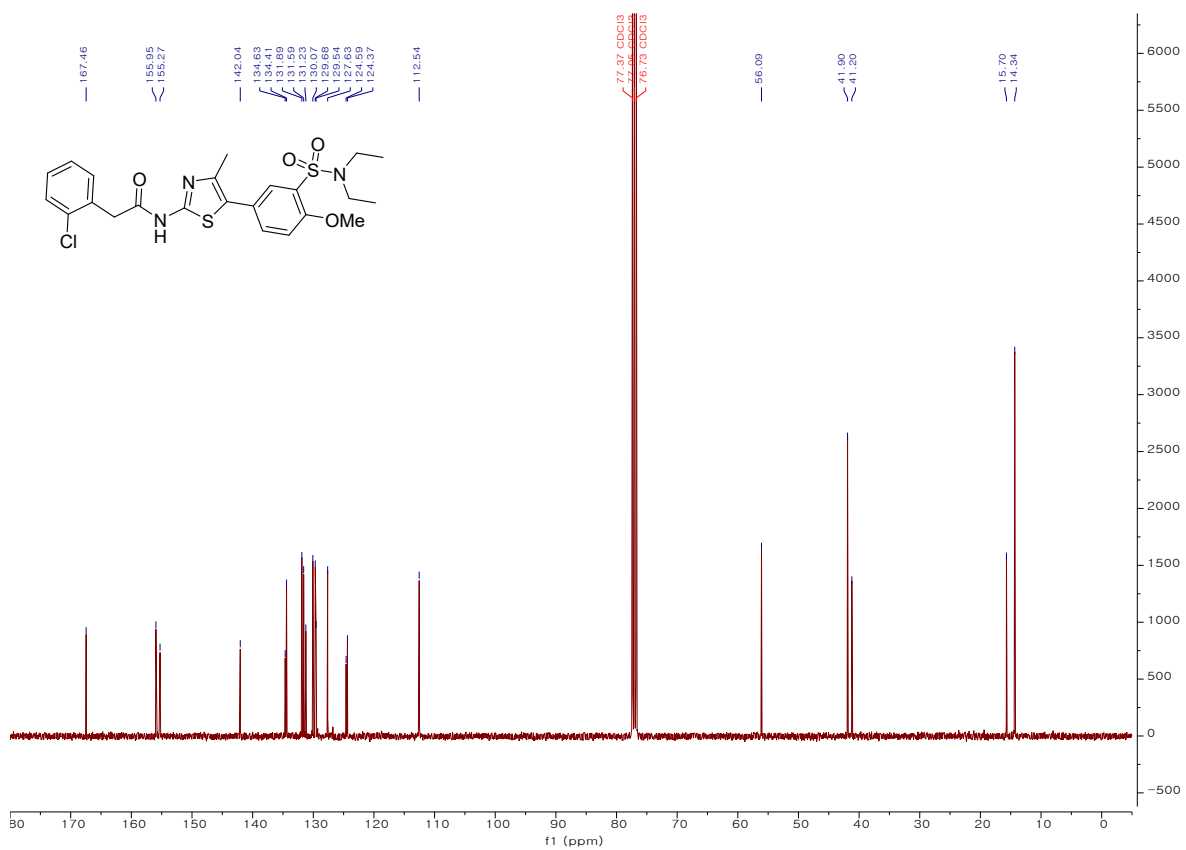

# 13C NMR spectrum of 5b (KR-27287)

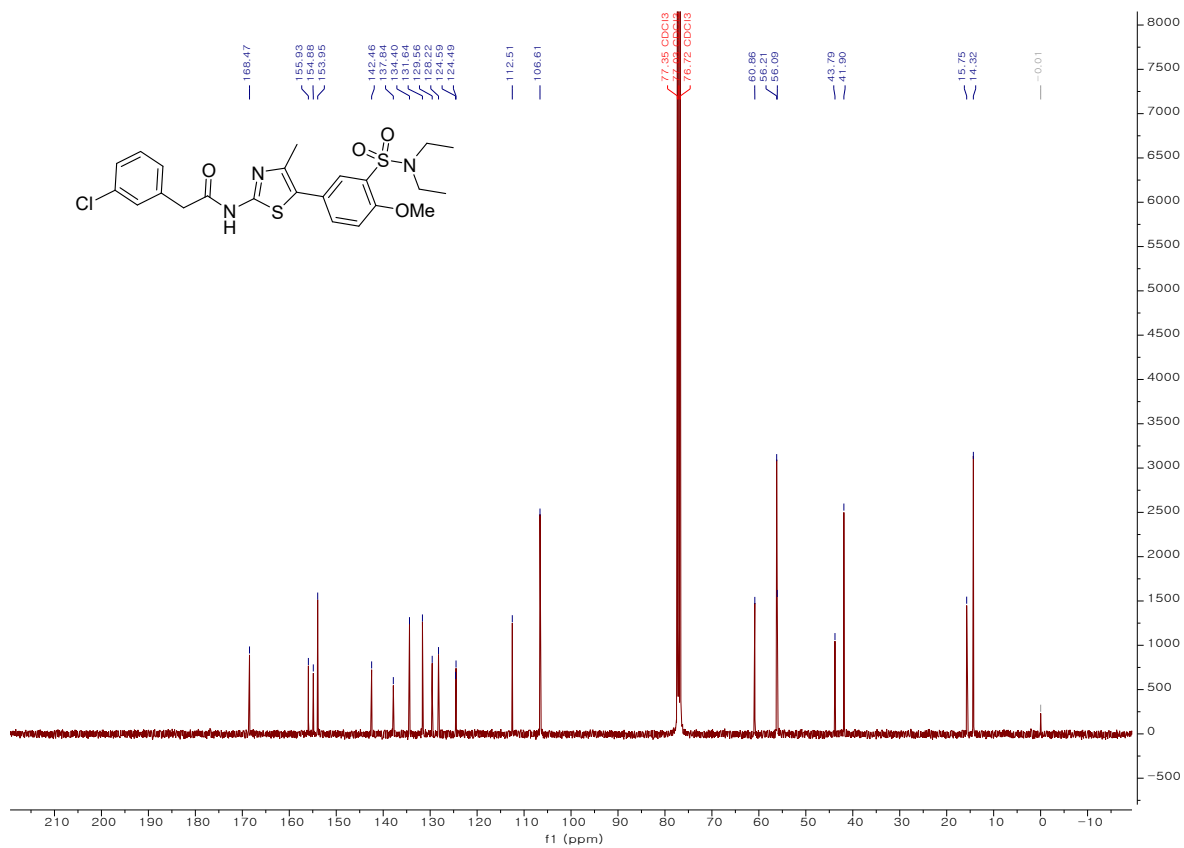

# 13C NMR spectrum of 5c (KR-27292)

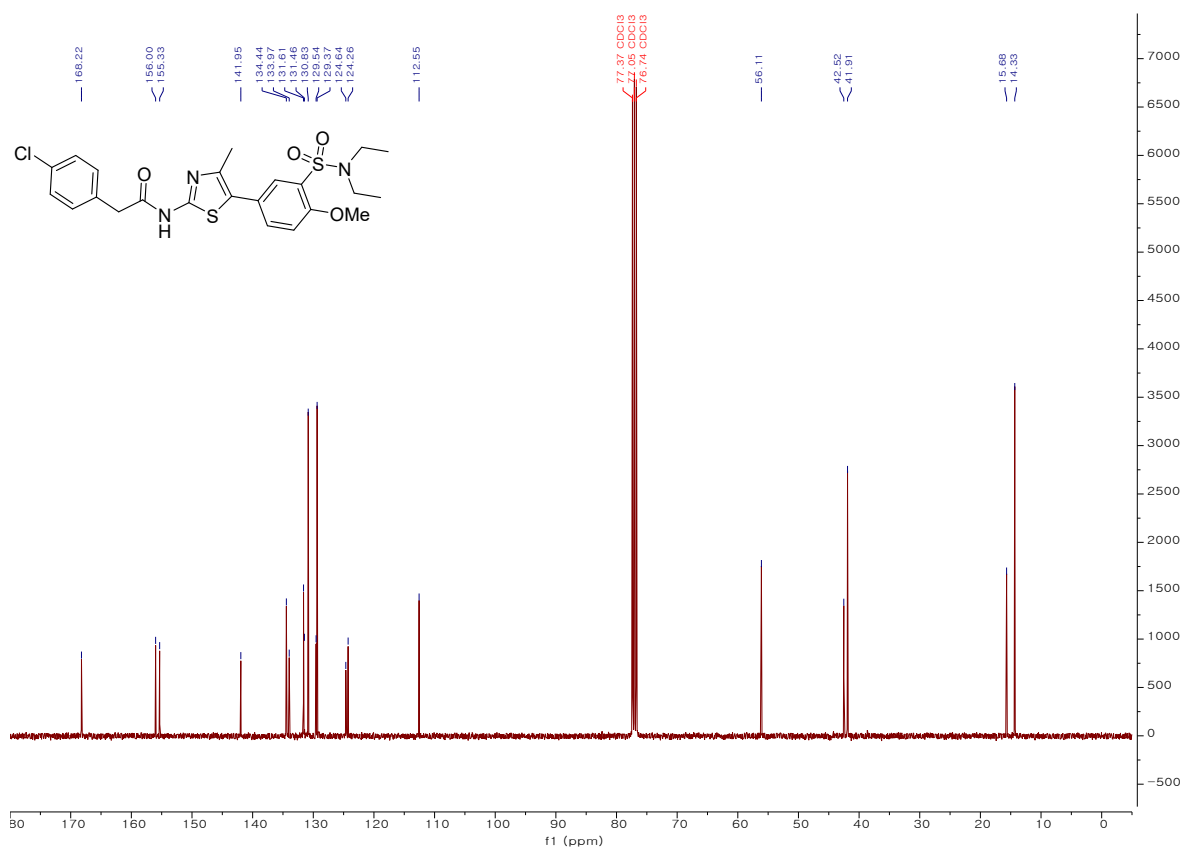

# 13C NMR spectrum of 5d (KR-27288)

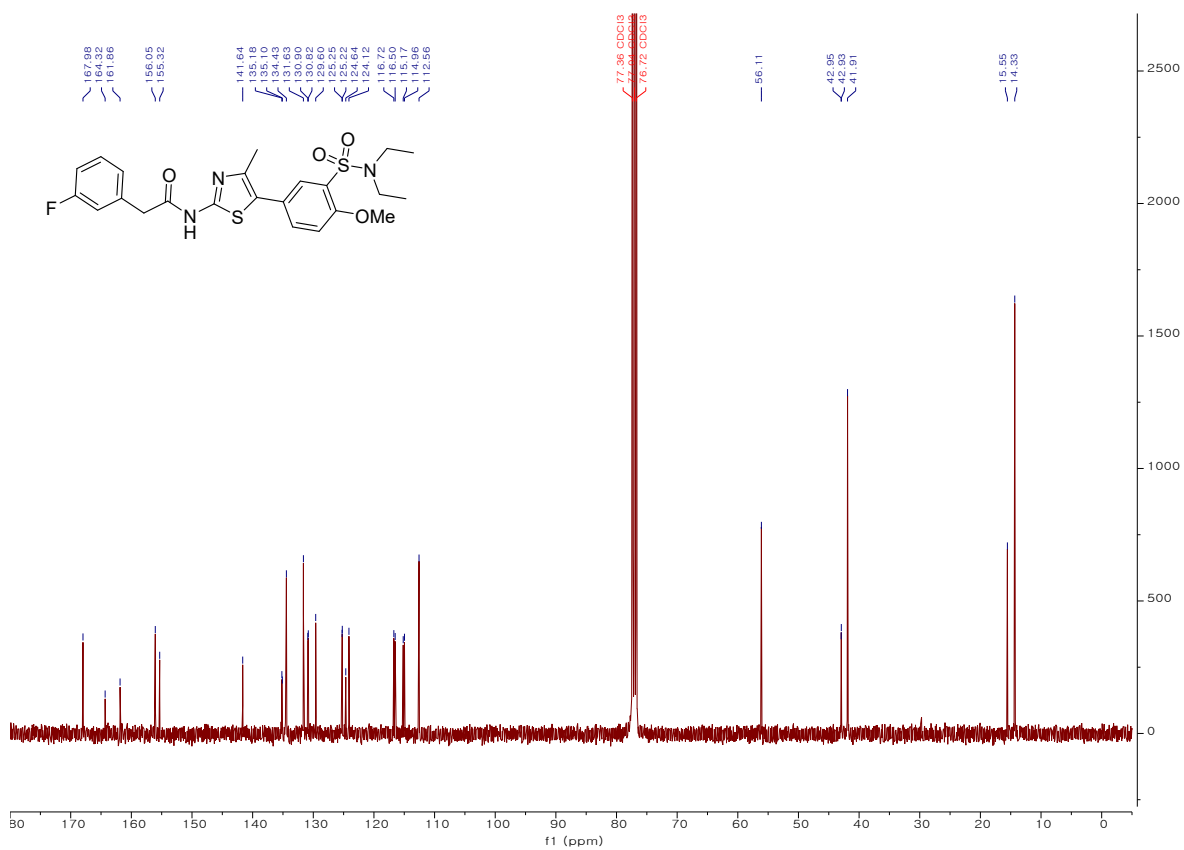

# 13C NMR spectrum of 5e (KR-27289)

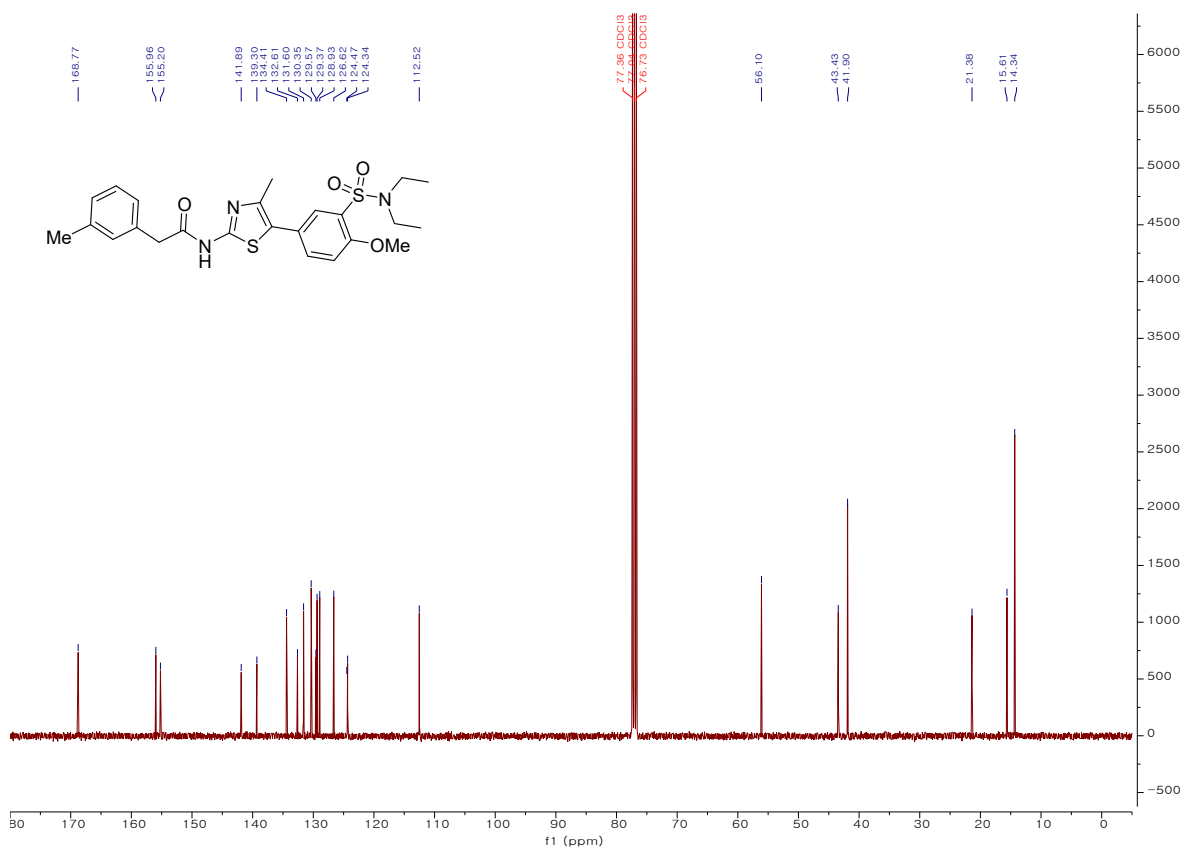

# 13C NMR spectrum of 5f (KR-27357)

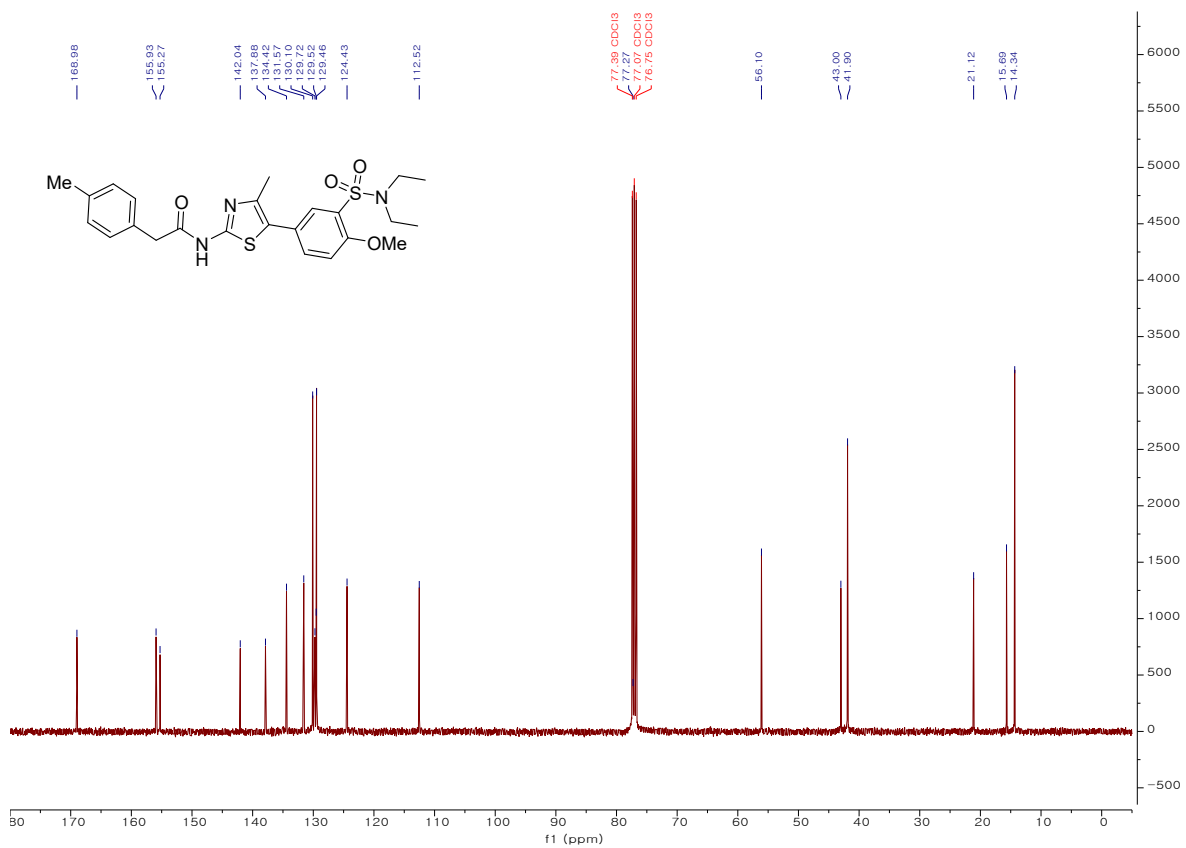



# 13C NMR spectrum of 5g (KR-27319)

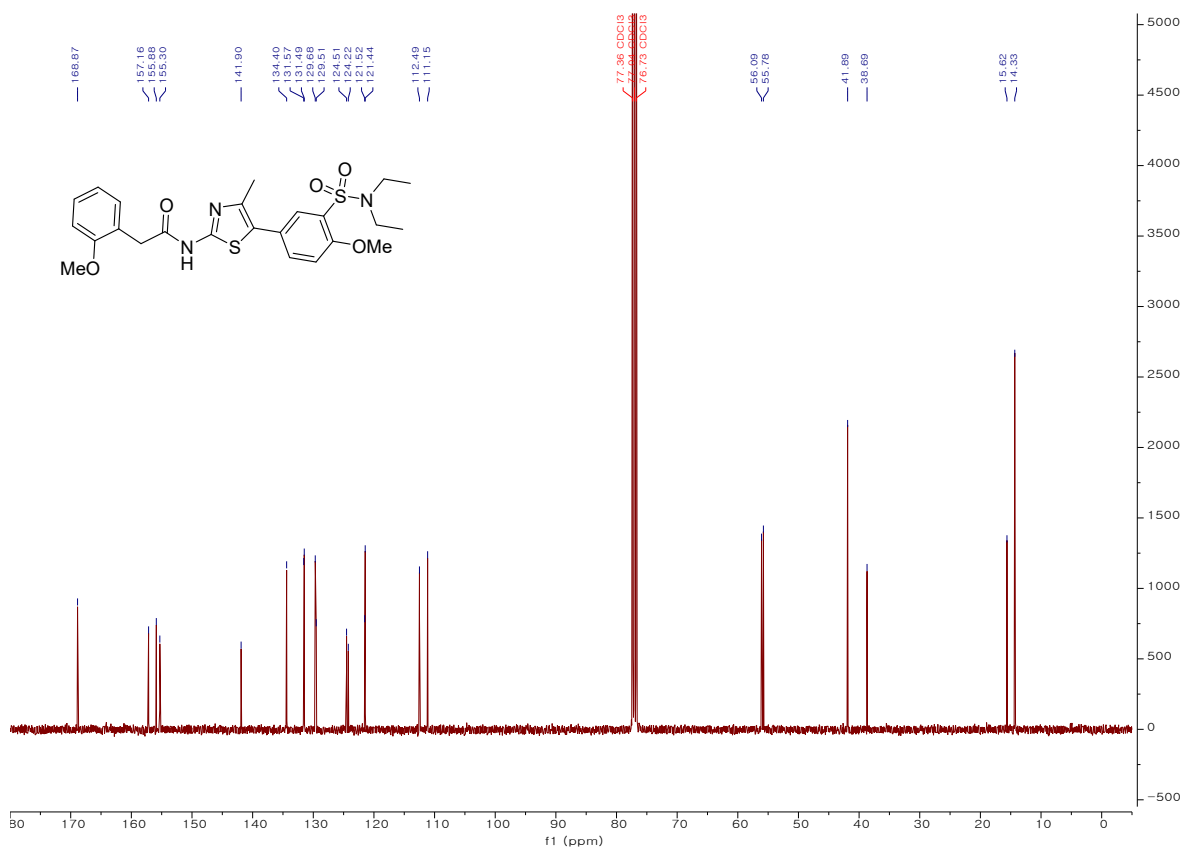

# 13C NMR spectrum of 5h (KR-27291)

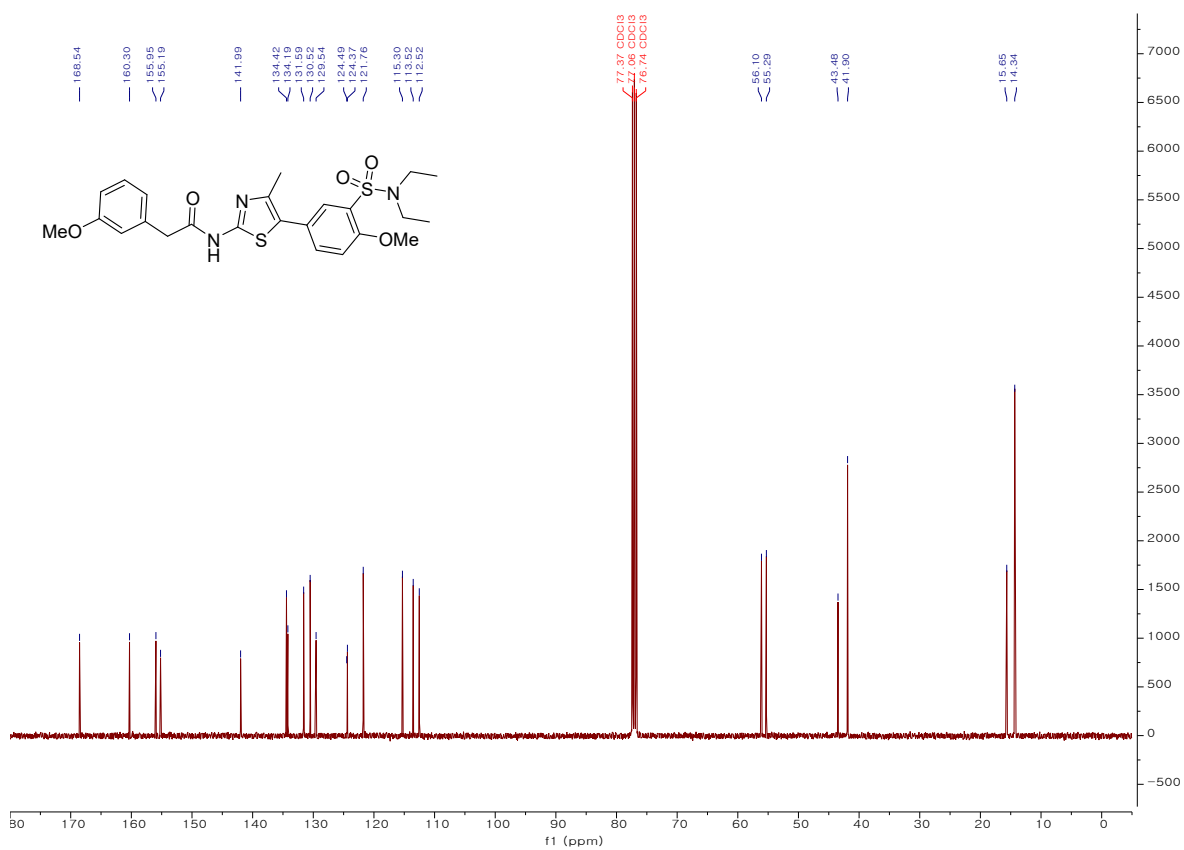

# 13C NMR spectrum of 5i (KR-27318)

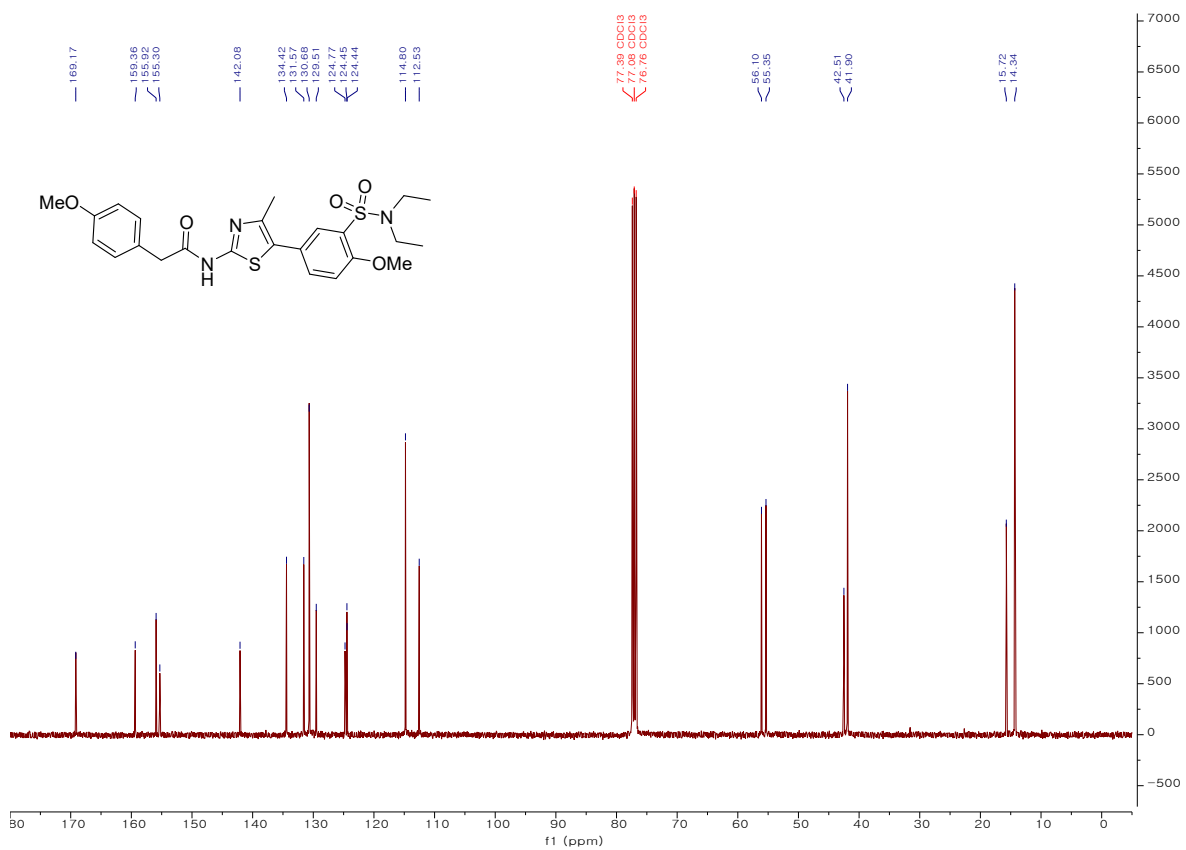

# 13C NMR spectrum of 5j (KR-27321)

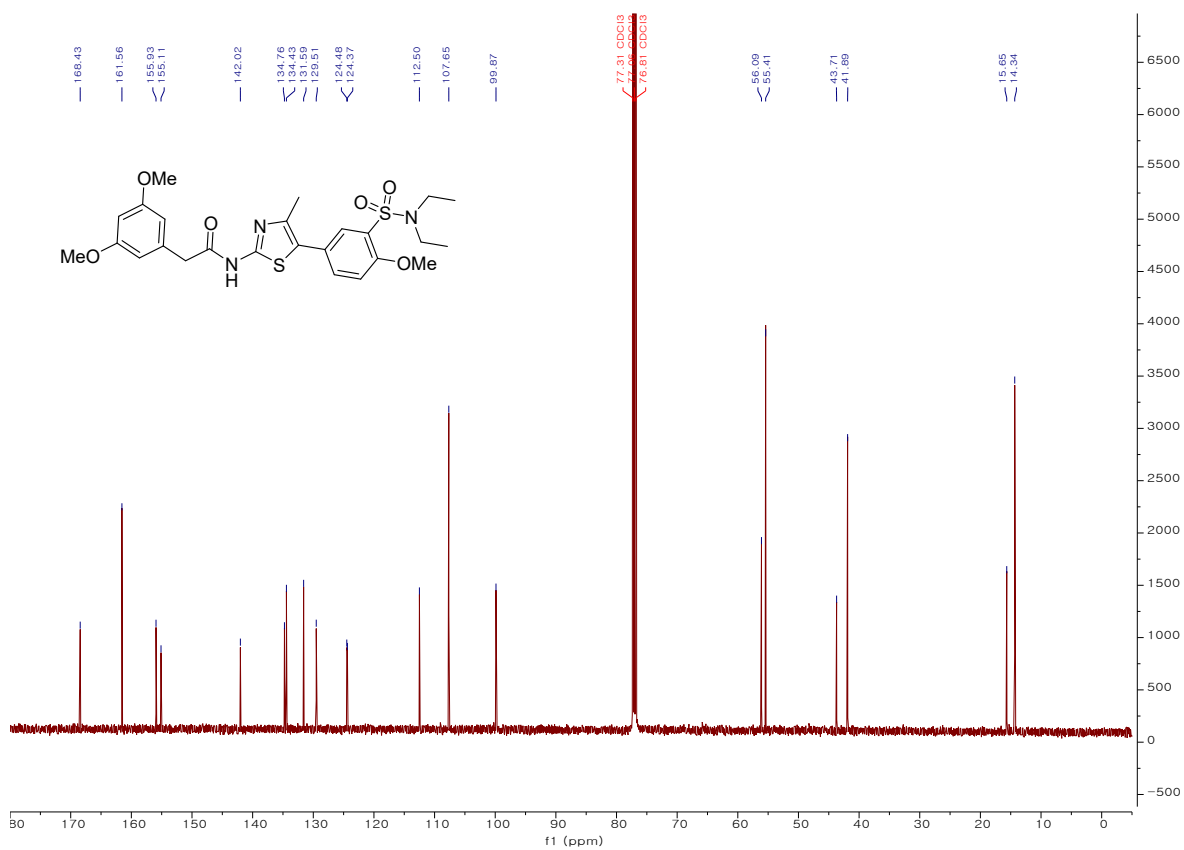

# 13C NMR spectrum of 5k (KR-27356)

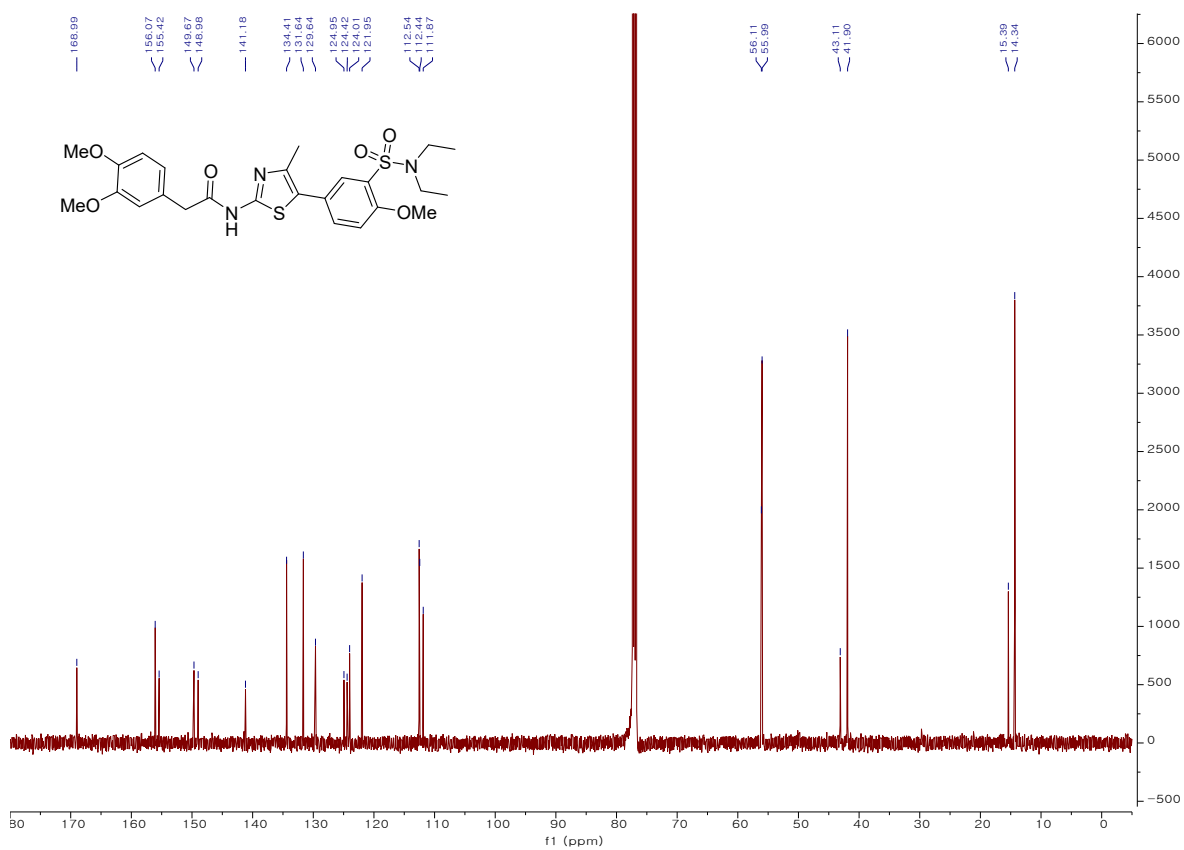

# 13C NMR spectrum of 51 (KR-27358)

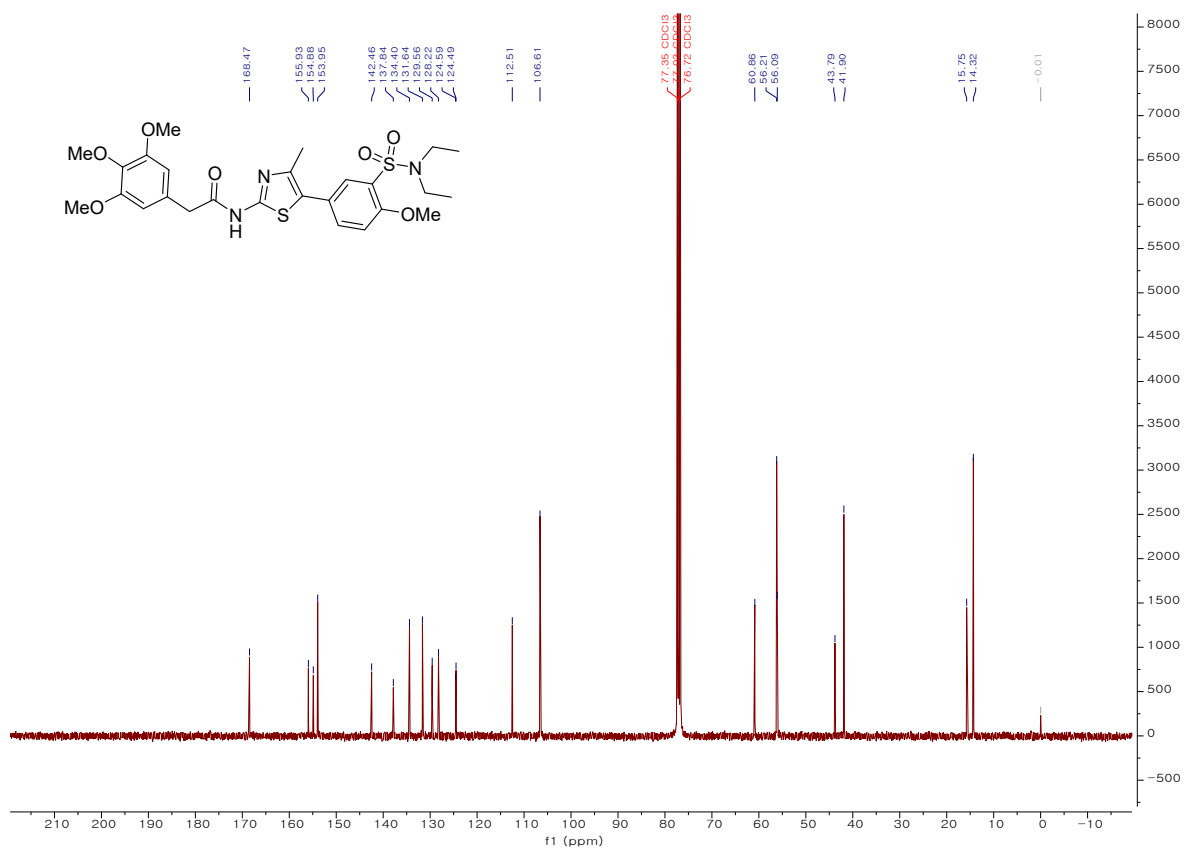

# 13C NMR spectrum of 6 (KR-27335)

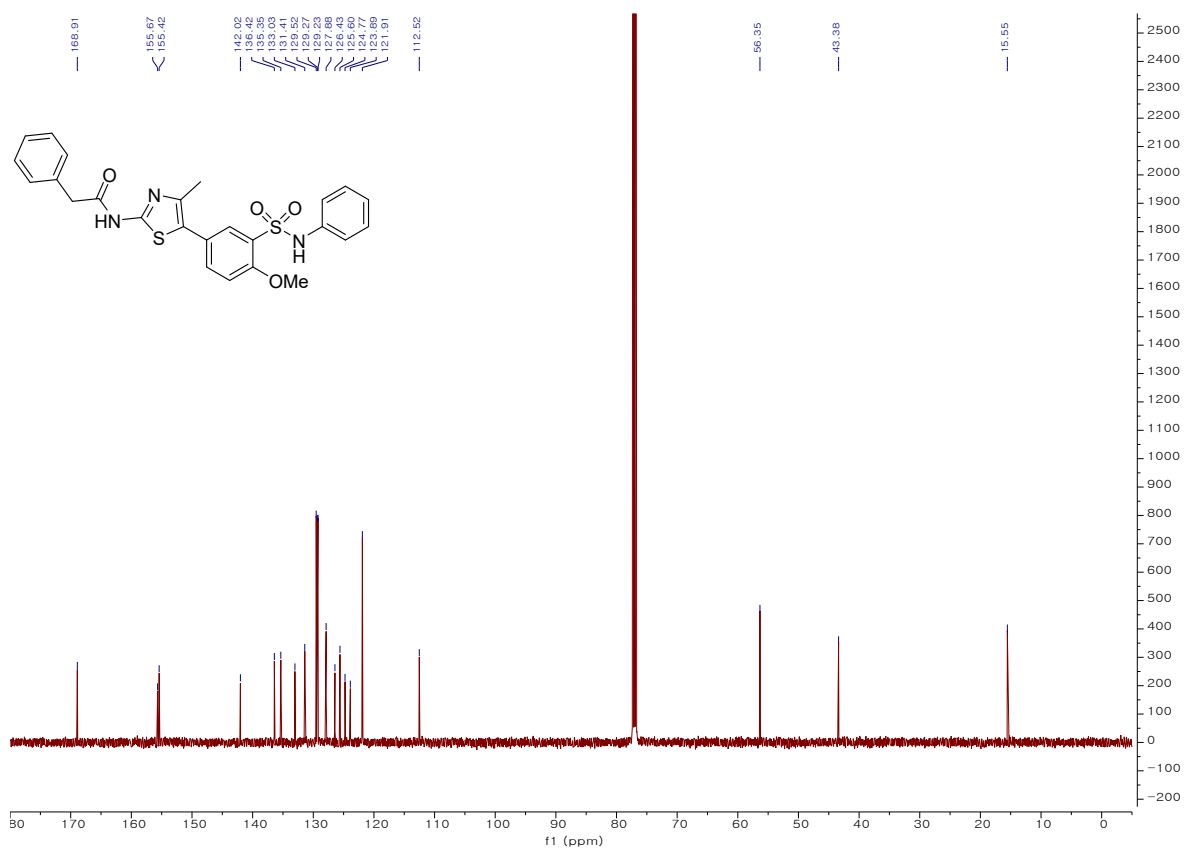

# <sup>13</sup>C NMR spectrum of 7a (KR-27336)

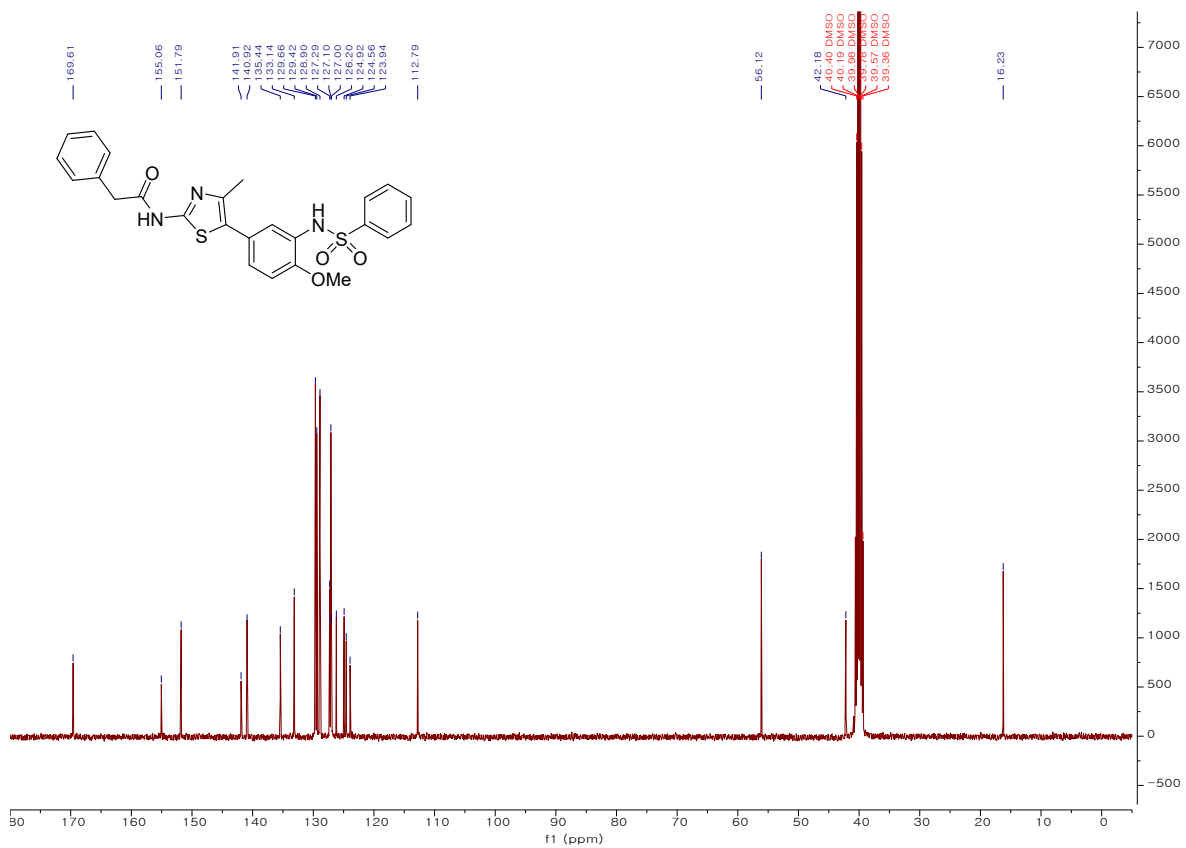



# $^{13}\text{C}$ NMR spectrum of **7b** (KR-27376)

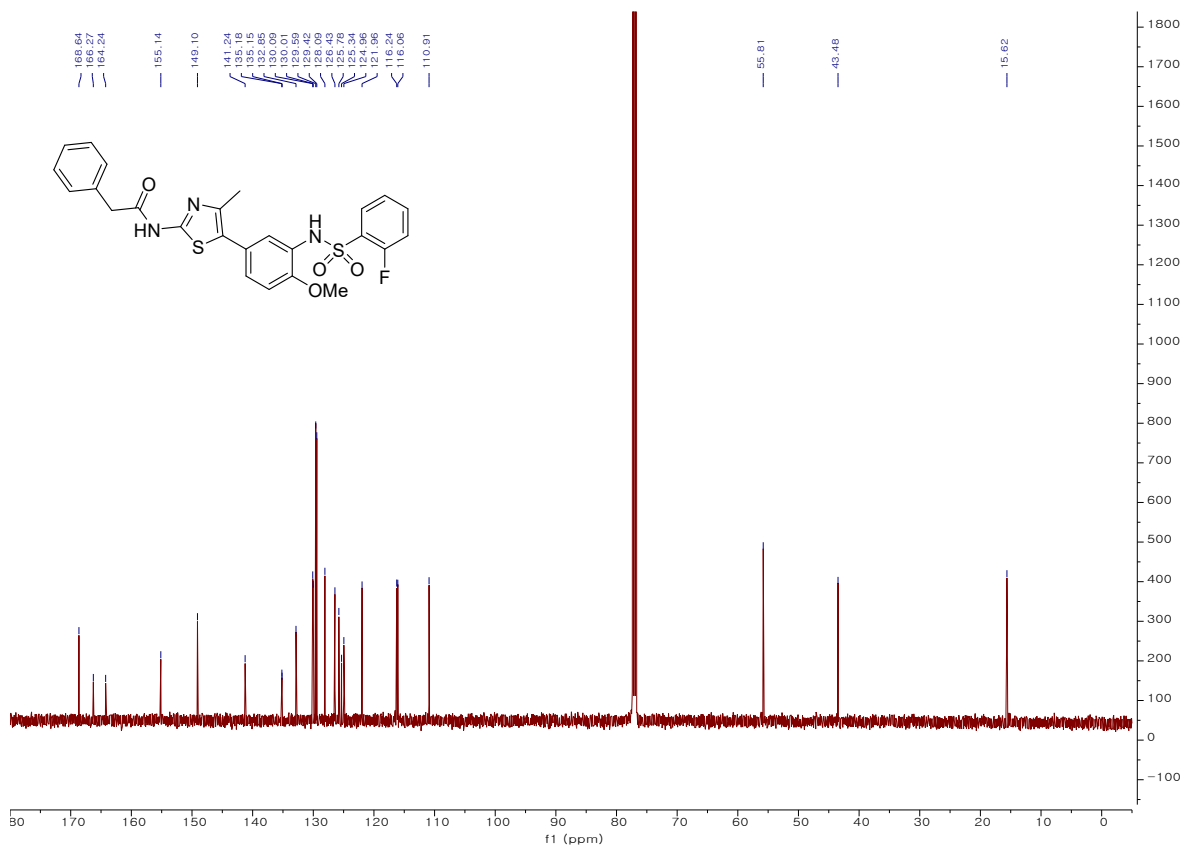

# <sup>13</sup>C NMR spectrum of 7c (KR-27377)

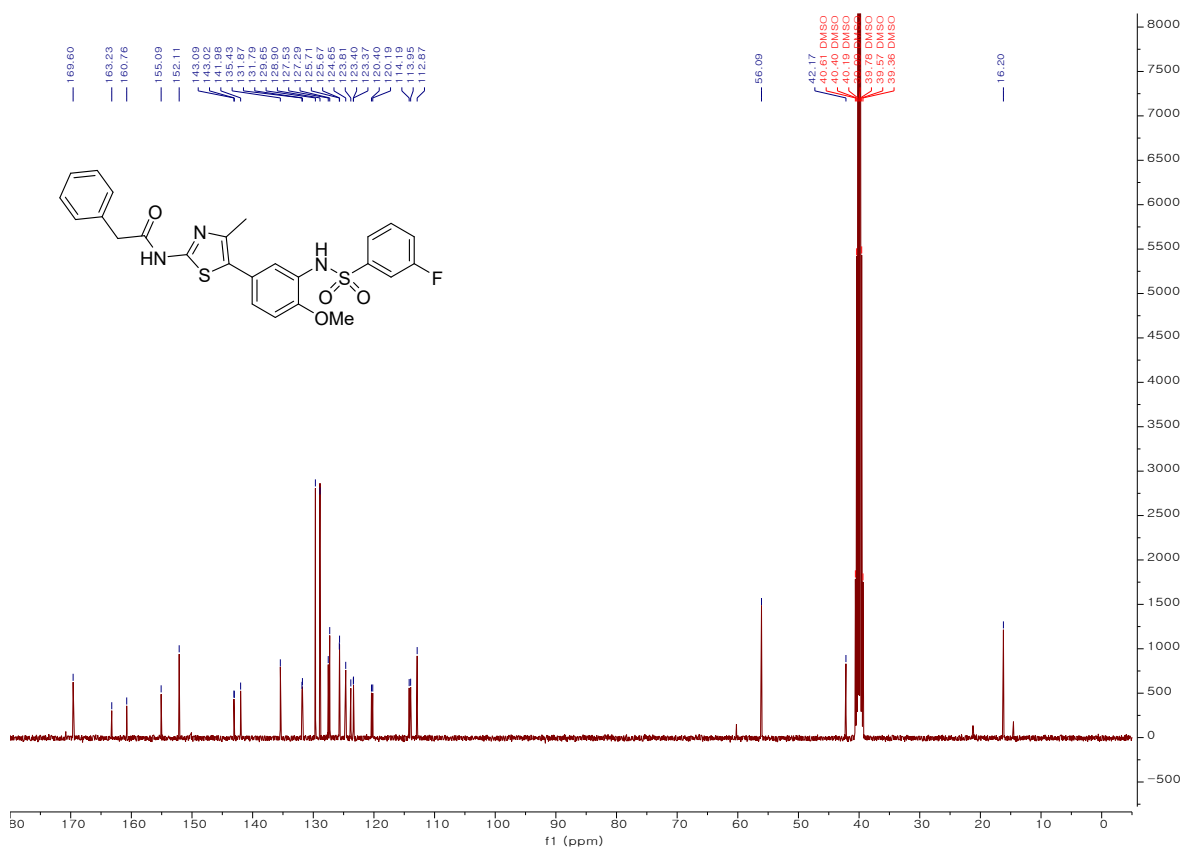

# 13C NMR spectrum of 7d (KR-27374)

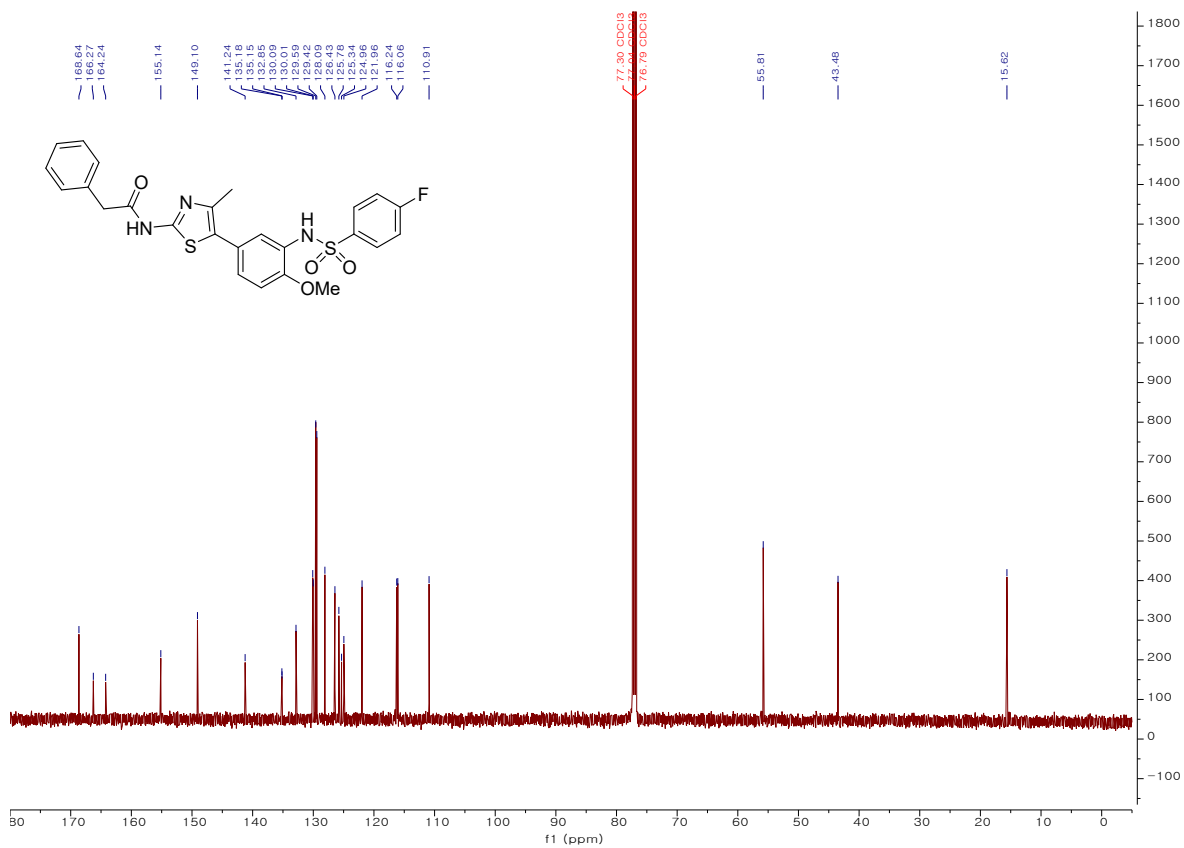

# <sup>13</sup>C NMR spectrum of 7e (KR-27375)

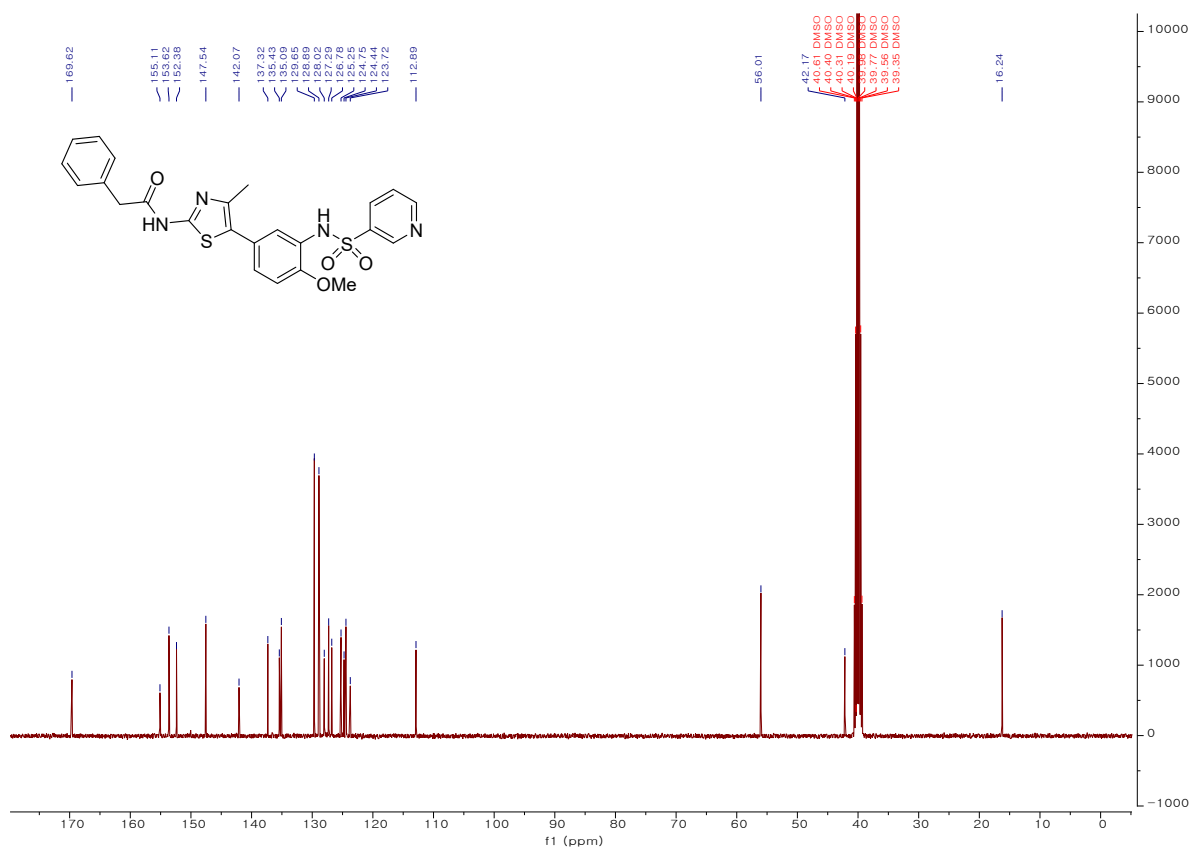

# <sup>13</sup>C NMR spectrum of 7f (KR-27370)

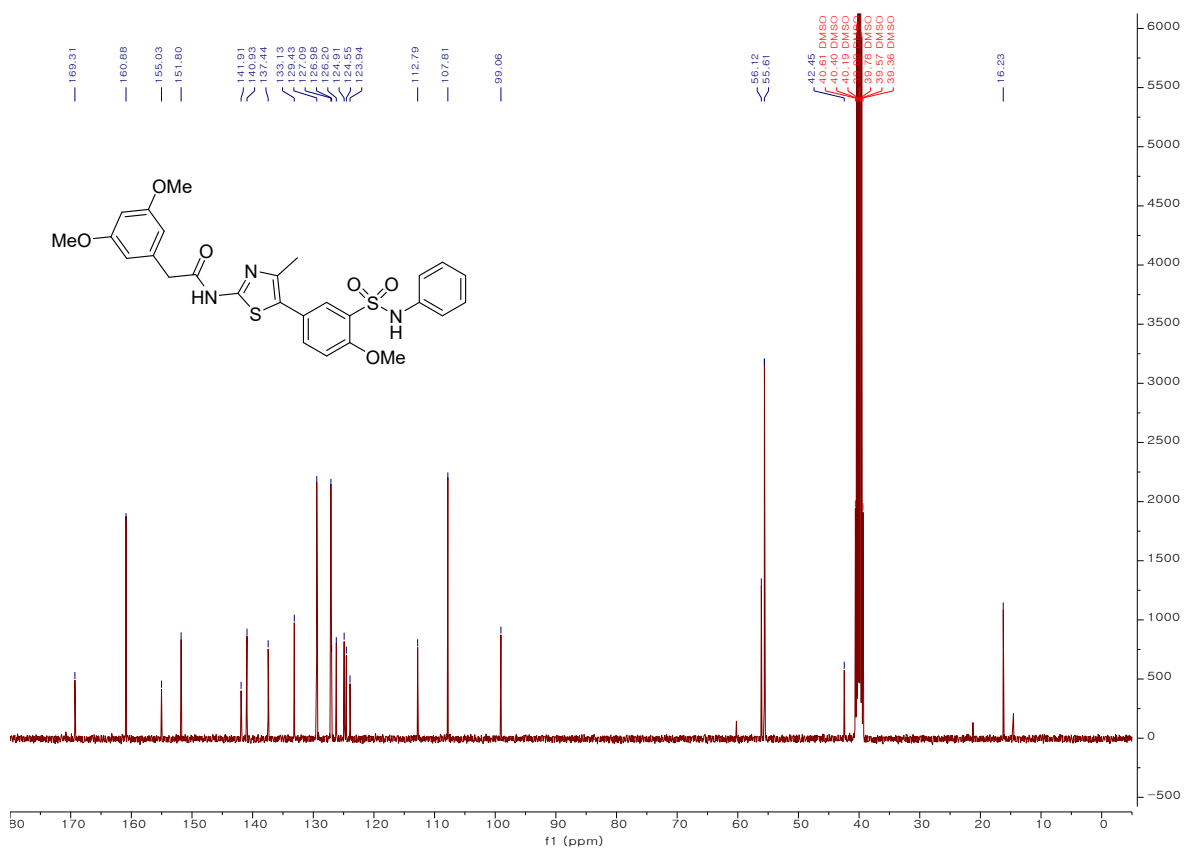

### S3. Spectral Copies of HRMS of Compounds

#### MS spectrum of 2 (KR-27282)

[ Mass Spectrum ]  
Date : 5-17-002 Date : 17-May-2023 09:46  
Instrument : MStation  
Sample : KR-27282  
Note :  
Inlet : Direct Ion Mode : EI+  
Spectrum Type : Normal Ion [MF-Linear]  
RT : 2.50 min Scan# : 76 Temp : 3276.7 deg.C  
BP : m/z 459.1274 Int. : 581.71 (6099631)  
Output m/z range : 150 to 500 Cut Level : 0.00 %

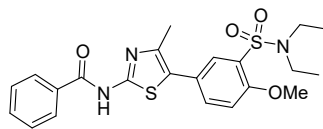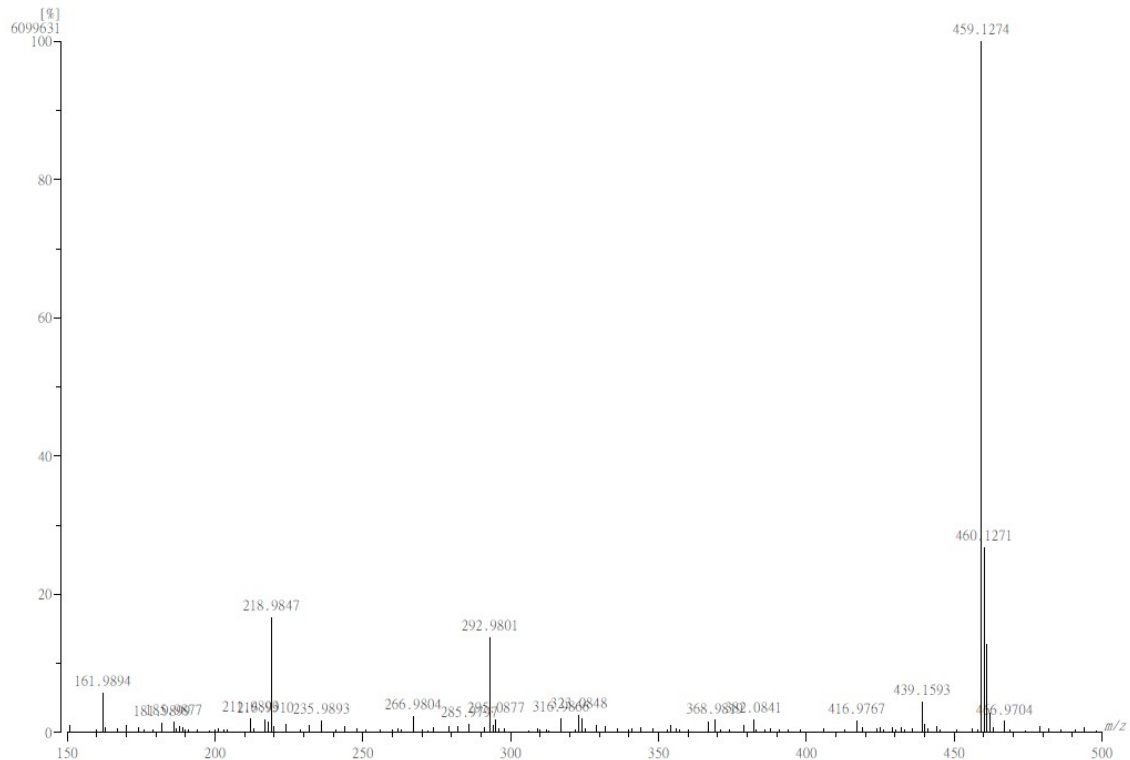

# MS spectrum of 3 (KR-27222)

[Mass Spectrum]  
Data : 5-17-003 Date : 17-May-2023 10:03  
RT : 1.94 min Scan# : 59  
Element :  
Mass Tolerance :  
Unsaturation :

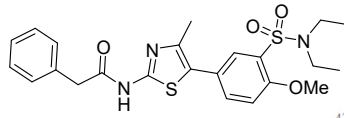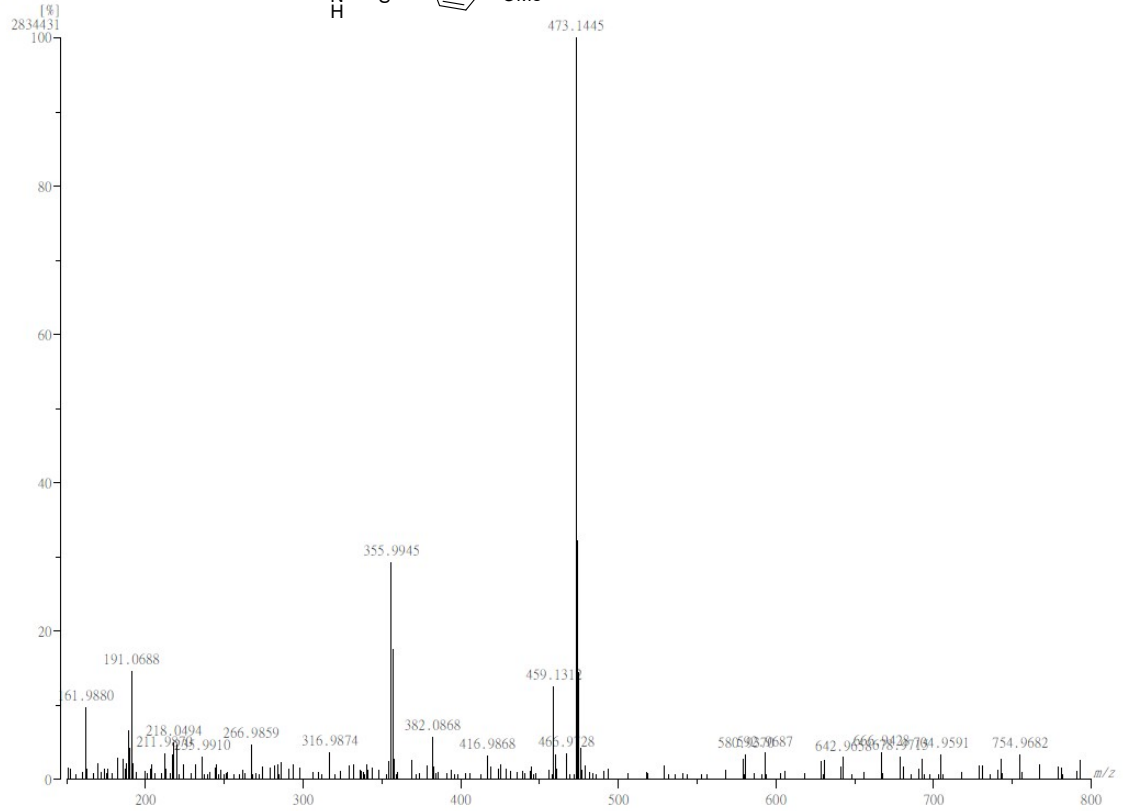

# MS spectrum of 4 (KR-27223)

[ Mass Spectrum ]  
Data : 5-17-004 Date : 17-May-2023 10:20  
Instrument : MStation  
Sample : KR-27223  
Note :  
Inlet : Direct Ion Mode : E1+  
Spectrum Type : Normal Ion [MF-Linear]  
RT : 2.10 min Scan#: 64 Temp : 3276.7 deg.C  
BP : m/z 487.1603 Int. : 872.61 (9149951)  
Output m/z range : 150 to 800 Cut Level : 0.00 %

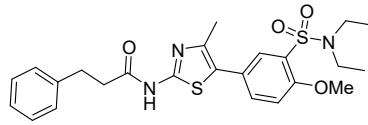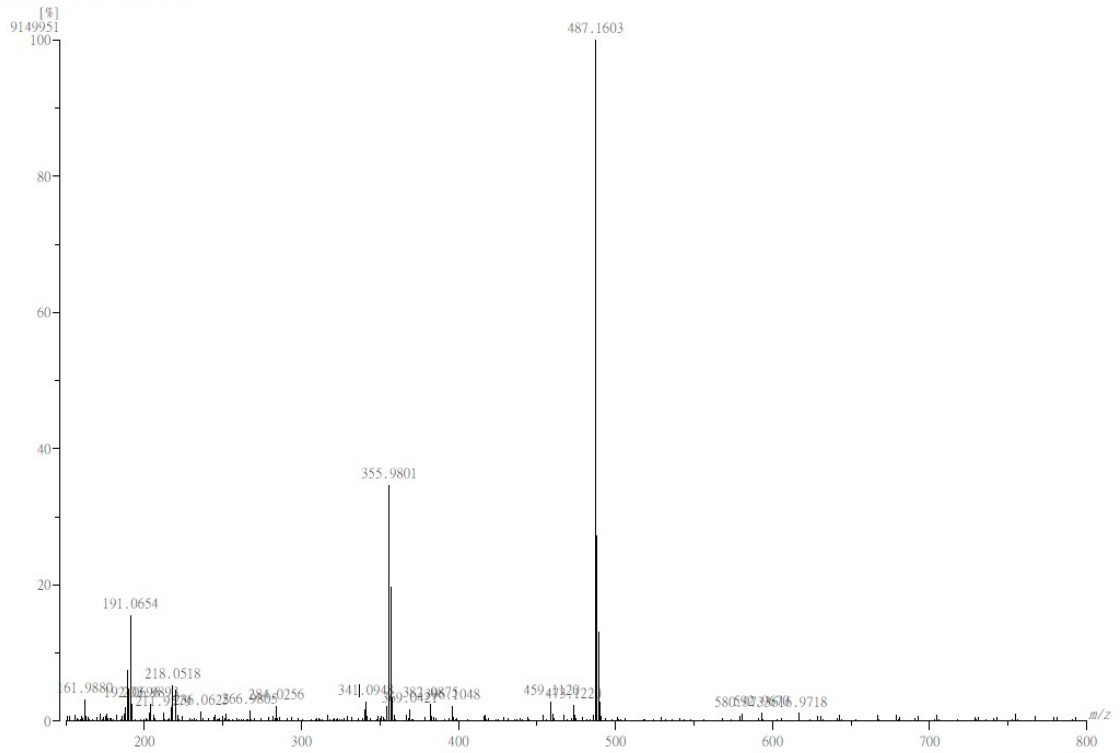



# MS spectrum of 5a (KR-27320)

[ Mass Spectrum ]  
Data : 5-17-005 Date : 17-May-2023 10:34  
Instrument : MStation  
Sample : KR-27320  
Note :  
Inlet : Direct Ion Mode : EI+  
Spectrum Type : Normal Ion [MF-Linear]  
RT : 2.84 min Scan# : 80 Temp : 3276.7 deg.C  
BP : m/z 507.1064 Int. : 379.88 (3983359)  
Output m/z range : 150 to 800 Cut Level : 0.00 %

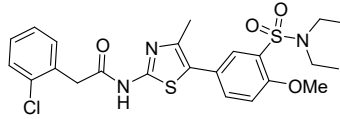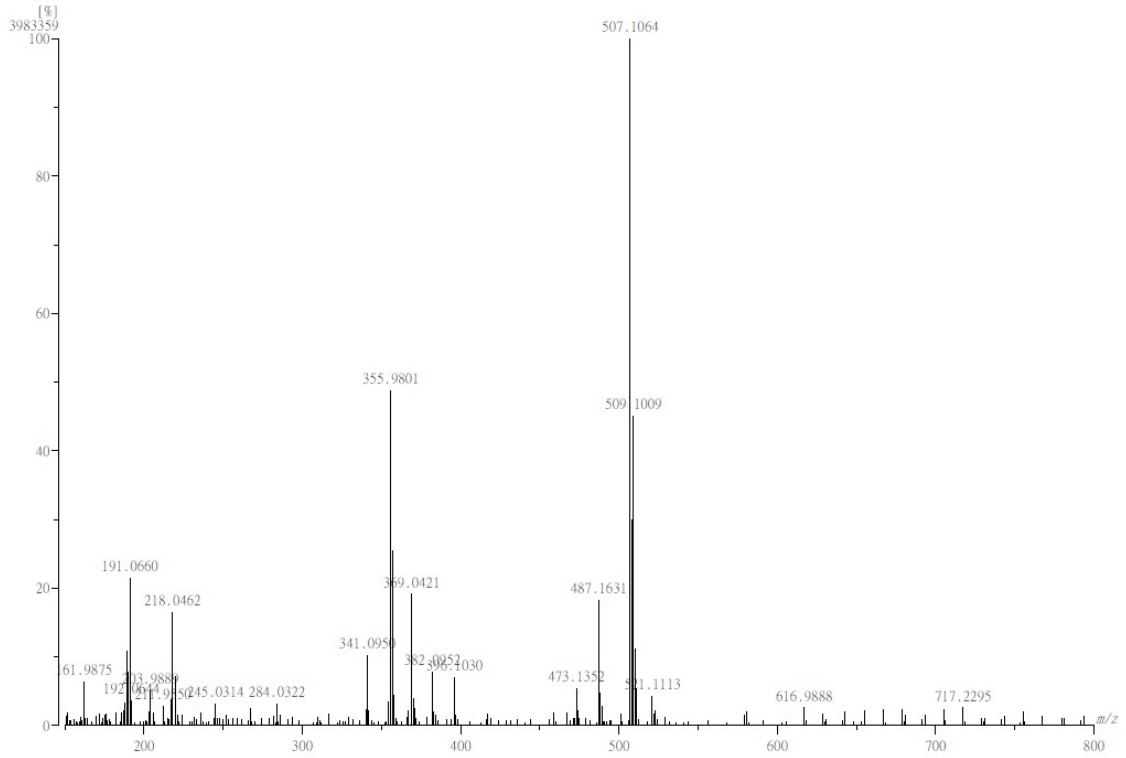

# MS spectrum of 5b (KR-27287)

[ Mass Spectrum ]  
Data : 5-17-006 Date : 17-May-2023 10:47  
Instrument : MStation  
Sample : KR-27287  
Note :  
Inlet : Direct Ion Mode : EI+  
Spectrum Type : Normal Ion [MF-Linear]  
RT : 2.74 min Scan# : 83 Temp : 3276.7 deg.C  
BP : m/z 355.1023 Int. : 343.43 (3601151)  
Output m/z range : 150 to 800 Cut Level : 0.00 %

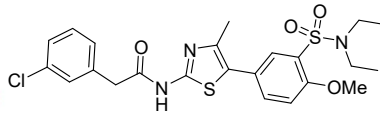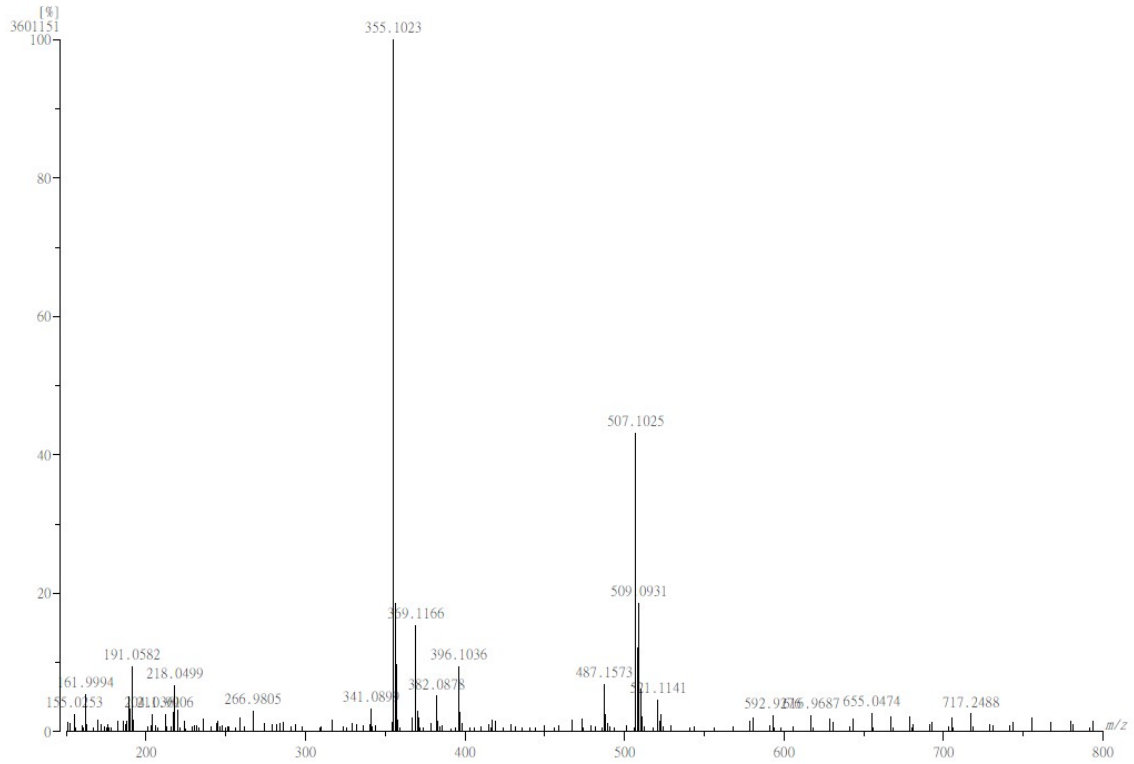

# MS spectrum of 5c (KR-27292)

[ Mass Spectrum ]  
Data : 5-24-001 Date : 24-May-2023 12:20  
Instrument : MSStation  
Sample : KR-27287  
Note :  
Inlet : Direct Ion Mode : EI+  
Spectrum Type : Normal Ion [MF-Linear]  
RT : 2.84 min Scan# : 86 Temp : 3276.7 deg.C  
BP : m/z 161.9925 Int. : 54.07 (566959)  
Output m/z range : 150 to 800 Cut Level : 0.00 %

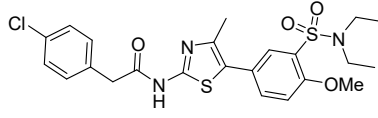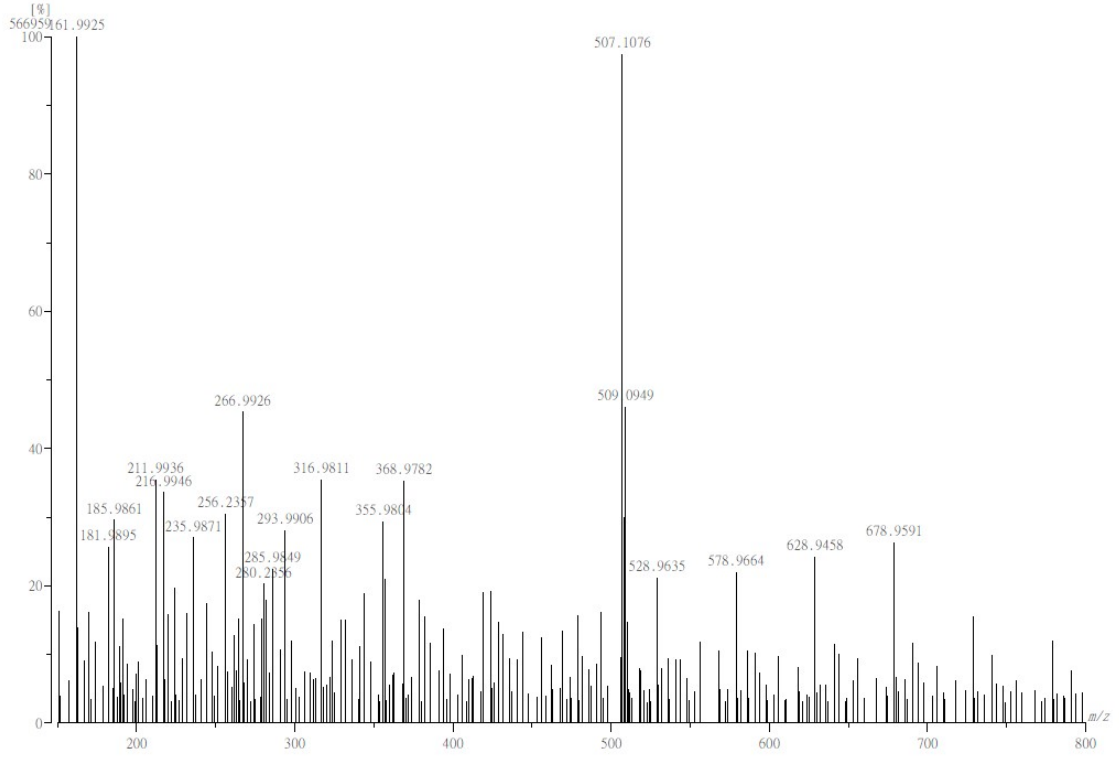

# MS spectrum of 5d (KR-27288)

[ Mass Spectrum ]  
Data : 5-17-007 Date : 17-May-2023 11:02  
Instrument : MStation  
Sample : KR-27288  
Note :  
Inlet : Direct Ion Mode : EI+  
Spectrum Type : Normal Ion [MF-Linear]  
RT : 1.77 min Scan# : 54 Temp : 3276.7 deg.C  
BP : m/z 491.1373 Int. : 65.82 (690143)  
Output m/z range : 150 to 800 Cut Level : 0.00 %

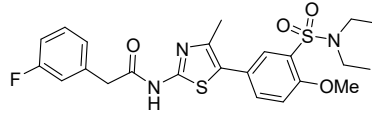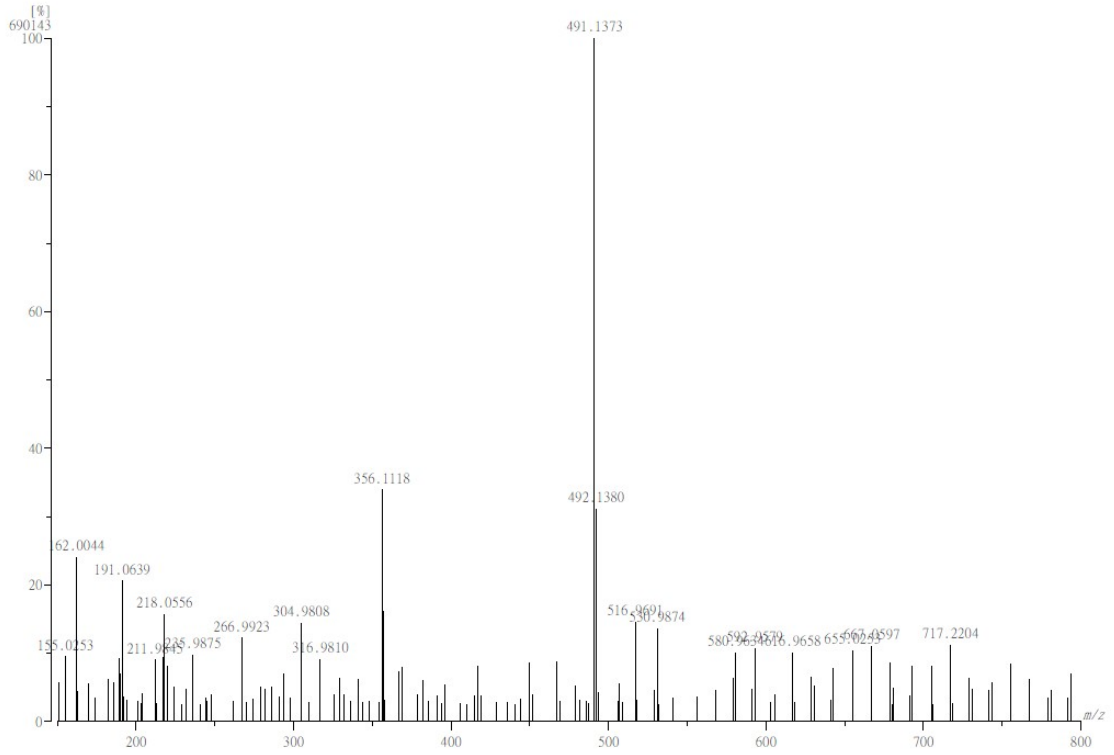

# MS spectrum of 5e (KR-27289)

[ Mass Spectrum ]  
Data : 5-17-008 Date : 17-May-2023 11:18  
Instrument : MSStation  
Sample : KR-27289  
Note :  
Inlet : Direct Ion Mode : EI+  
Spectrum Type : Normal Ion [MF-Linear]  
RT : 2.10 min Scan# : 64 Temp : 3276.7 deg.C  
BP : m/z 487.1612 Int. : 287.82 (3017999)  
Output m/z range : 150 to 800 Cut Level : 0.00 %

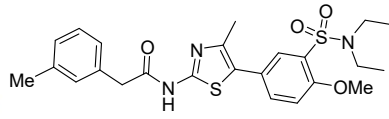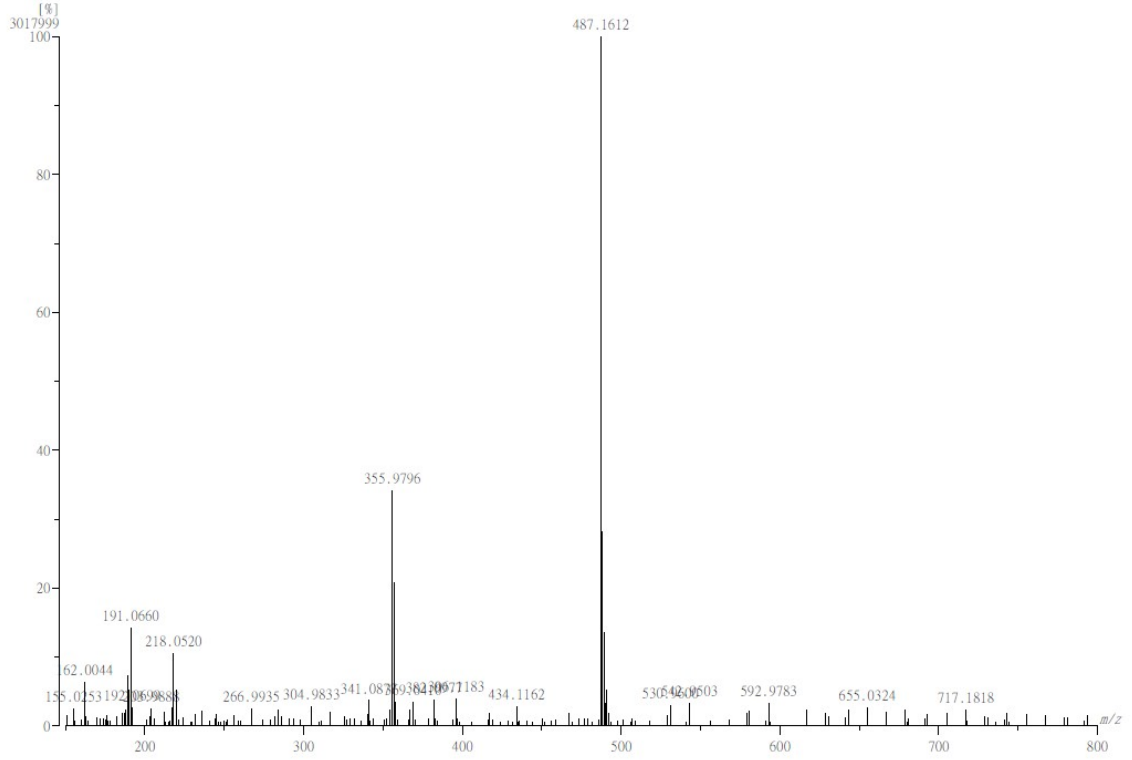

# MS spectrum of 5f (KR-27357)

[ Mass Spectrum ]  
Data : 5-17-009 Date : 17-May-2023 13:10  
Instrument : MStation  
Sample : KR-27357  
Note :  
Inlet : Direct Ion Mode : EI+  
Spectrum Type : Normal Ion [MF-Linear]  
RT : 2.87 min Scan# : 87 Temp : 3276.7 deg.C  
BP : m/z 355.1012 Int. : 70.56 (739839)  
Output m/z range : 150 to 800 Cut Level : 0.00 %

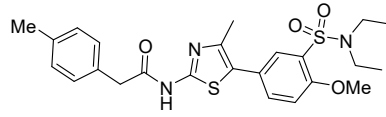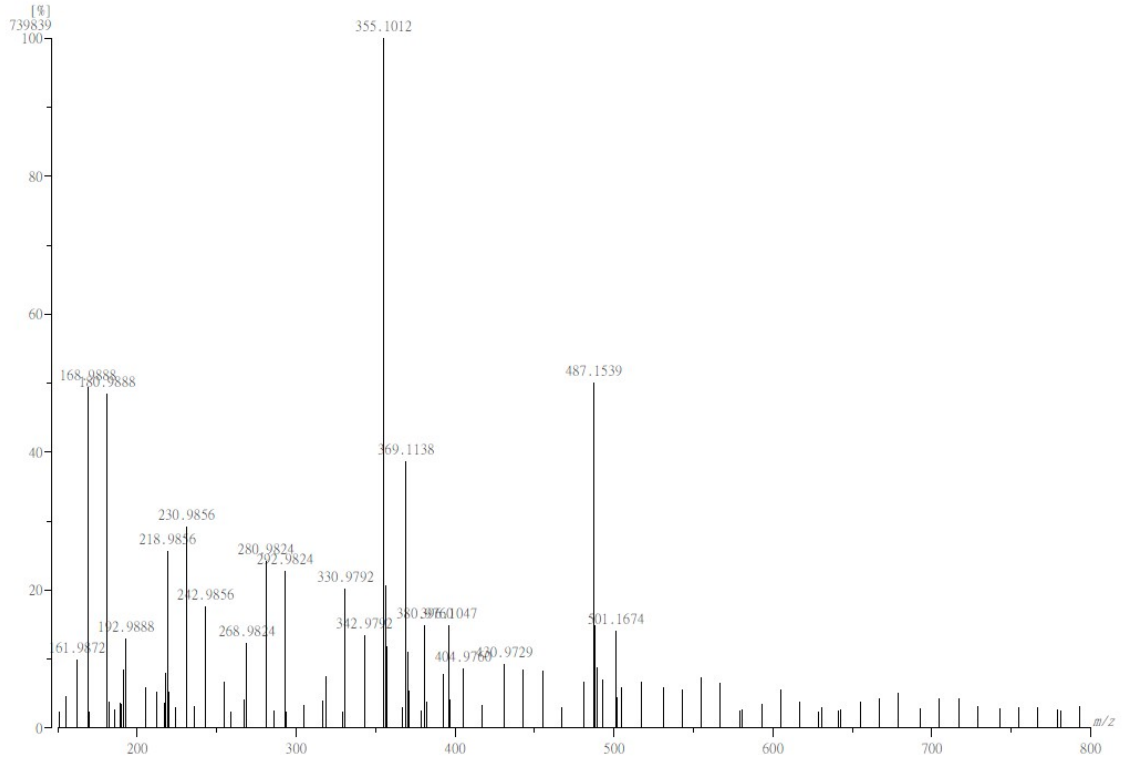

# MS spectrum of 5g (KR-27319)

[ Mass Spectrum ]  
Data : 5-17-011 Date : 17-May-2023 13:41  
Instrument : MSStation  
Sample : KR-27319  
Note :  
Inlet : Direct Ion Mode : EI+  
Spectrum Type : Normal Ion [MF-Linear]  
RT : 1.40 min Scan# : 43 Temp : 3276.7 deg.C  
BP : m/z 168.9888 Int. : 31.44 (329631)  
Output m/z range : 150 to 800 Cut Level : 0.00 %

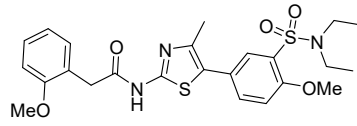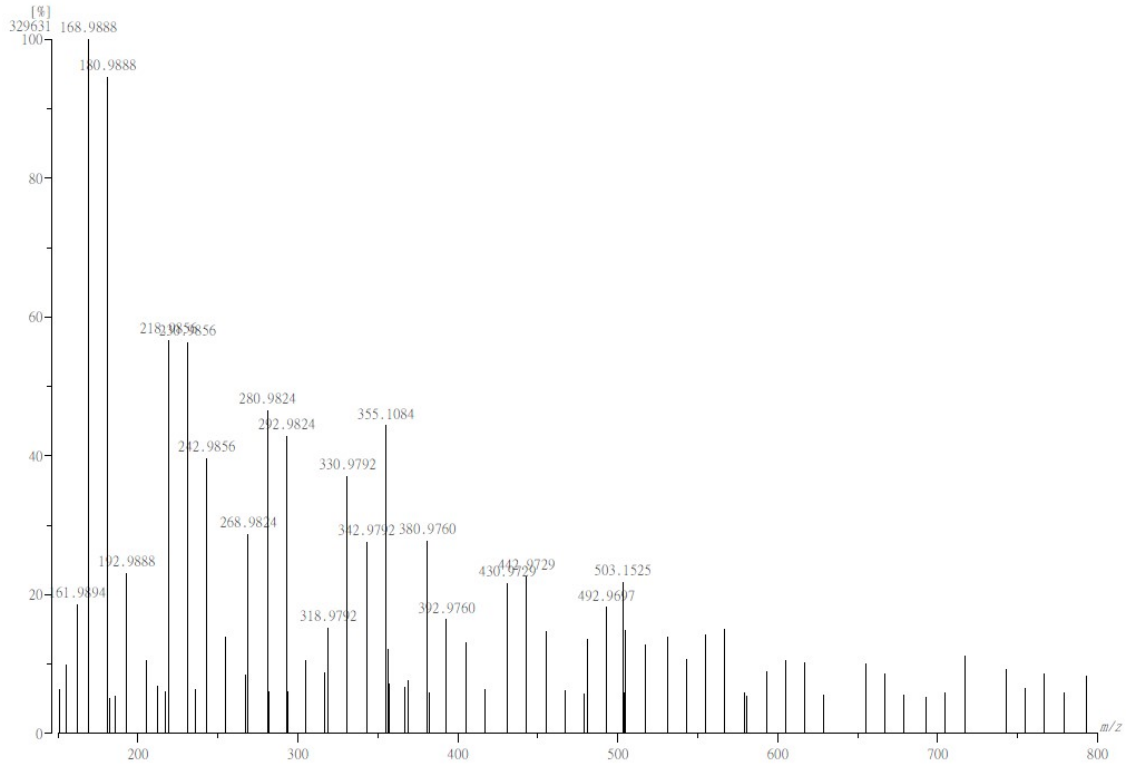

# MS spectrum of 5h (KR-27291)

[ Mass Spectrum ]  
Data : 5-17-012 Date : 17-May-2023 14:08  
Instrument : MStation  
Sample : KR-27291  
Note :  
Inlet : Direct Ion Mode : EI+  
Spectrum Type : Normal Ion [MF-Linear]  
RT : 2.47 min Scan# : 75 Temp : 3276.7 deg.C  
BP : m/z 168.9888 Int. : 48.54 (509007)  
Output m/z range : 150 to 800 Cut Level : 0.00 %

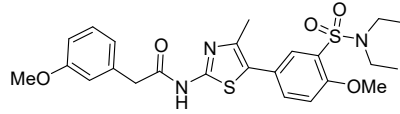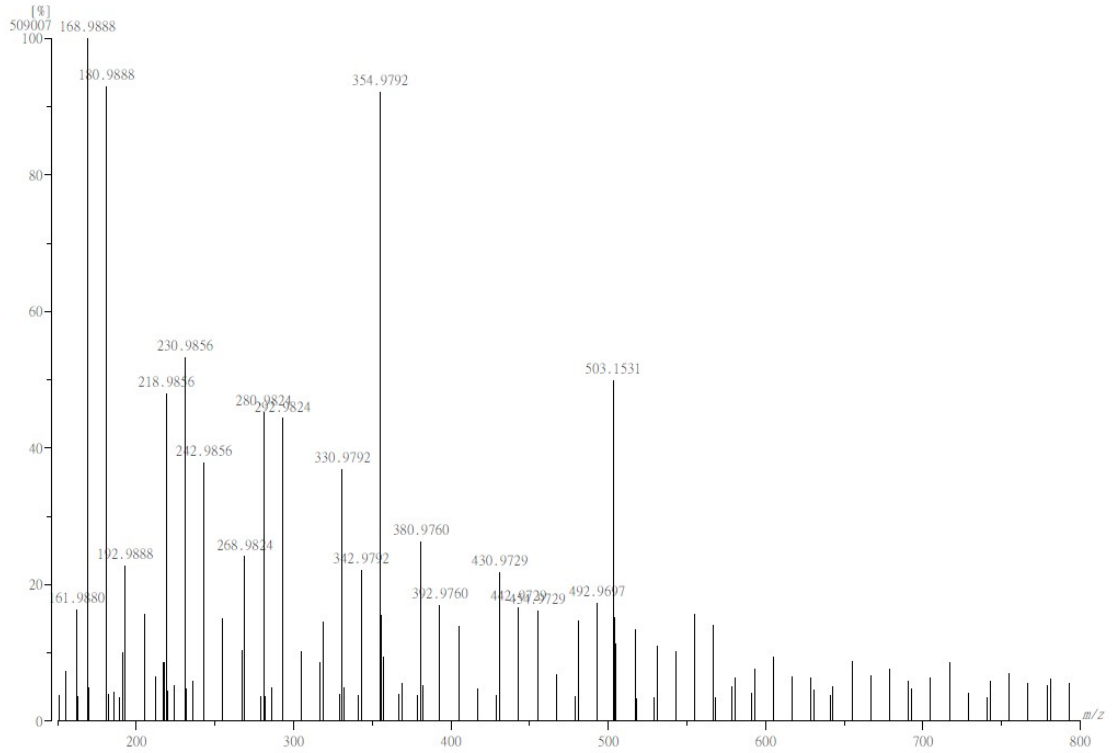



# MS spectrum of 5i (KR-27318)

[ Mass Spectrum ]  
Data : 5-17-013 Date : 17-May-2023 14:22  
Instrument : MStation  
Sample : KR-27318  
Note :  
Inlet : Direct Ion Mode : EI+  
Spectrum Type : Normal Ion [MF-Linear]  
RT : 1.94 min Scan# : 59 Temp : 3276.7 deg.C  
BP : m/z 168.9888 Int. : 41.35 (433583)  
Output m/z range : 150 to 800 Cut Level : 0.00 %

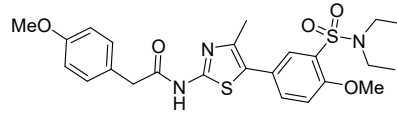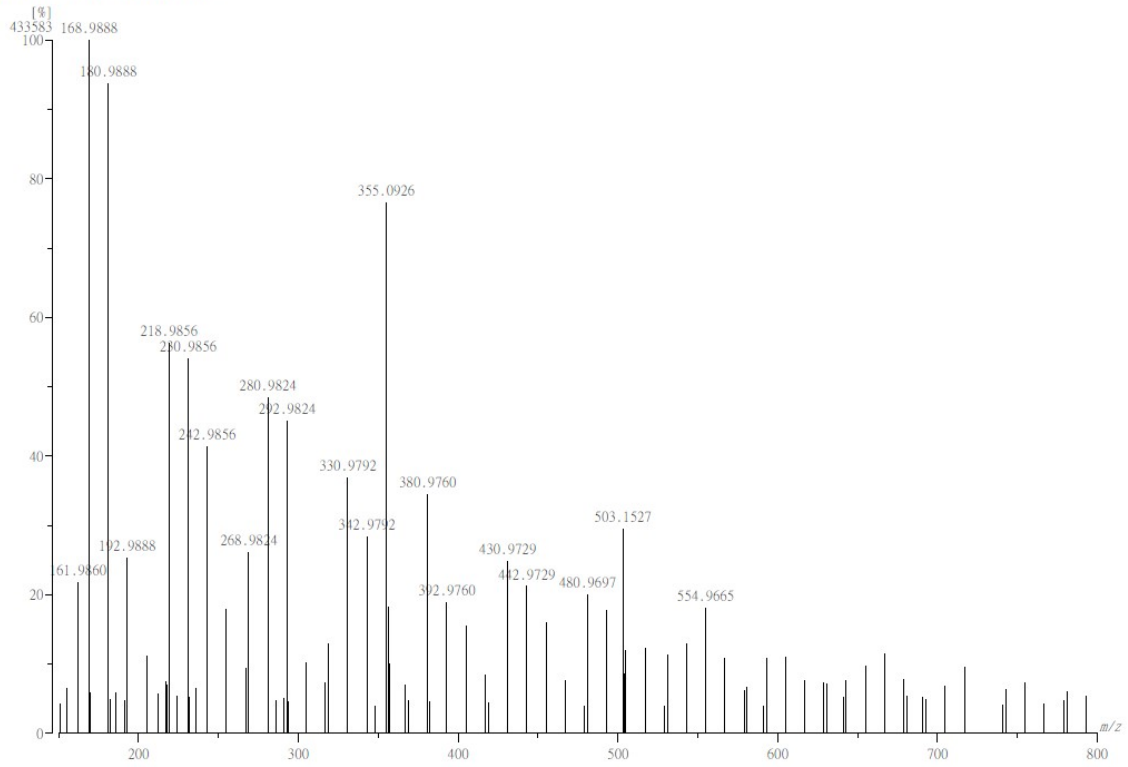

# MS spectrum of 5j (KR-27321)

[ Mass Spectrum ]  
Data : 5-17-010 Date : 17-May-2023 13:23  
Instrument : MStation  
Sample : KR-27321  
Note :  
Inlet : Direct Ion Mode : E1+  
Spectrum Type : Normal Ion [MF-Linear]  
RT : 4.33 min Scan# : 131 Temp : 3263.9 deg.C  
BP : m/z 382.0863 Int. : 70.48 (739071)  
Output m/z range : 150 to 800 Cut Level : 0.00 %

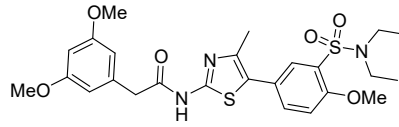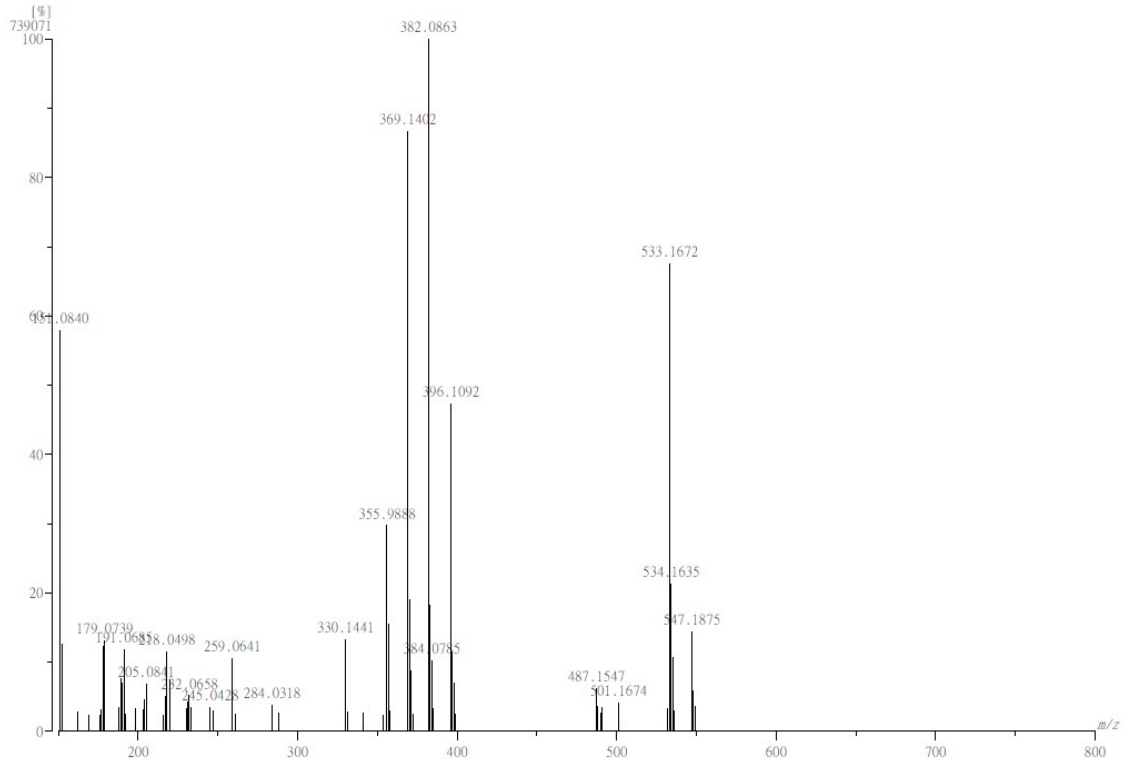

# MS spectrum of 5k (KR-27356)

[ Mass Spectrum ]  
Data : 5-24-002 Date : 24-May-2023 12:33  
Instrument : MSStation  
Sample : KR-27356  
Note :  
Inlet : Direct Ion Mode : EI+  
Spectrum Type : Normal Ion [MF-Linear]  
RT : 2.30 min Scan# : 70 Temp : 3276.7 deg.C  
BP : m/z 355.9874 Int. : 87.45 (916991)  
Output m/z range : 150 to 800 Cut Level : 0.00 %

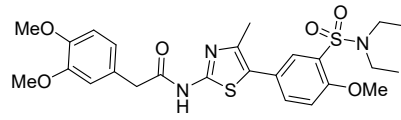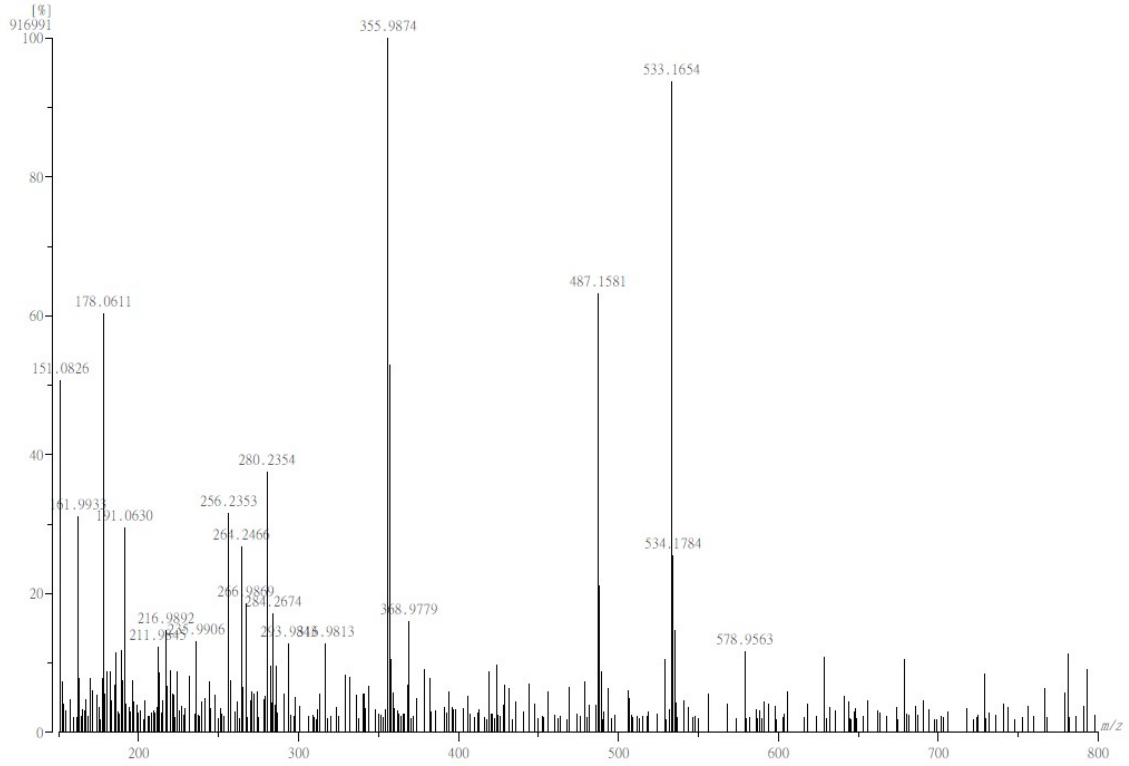

# MS spectrum of 5I (KR-27358)

[ Mass Spectrum ]  
Data : 9-20-002 Date : 20-Sep-2023 15:08  
Instrument : MStation  
Sample : KR-27358  
Note : -  
Inlet : Direct Ion Mode : FAB+  
Spectrum Type : Normal Ion [MF-Linear]  
RT : 0.99 min Scan# : 18 Temp : 3276.7 deg.C  
BP : m/z 564.1844 Int. : 26.58 (278735)  
Output m/z range : 400 to 710 Cut Level : 0.00 %

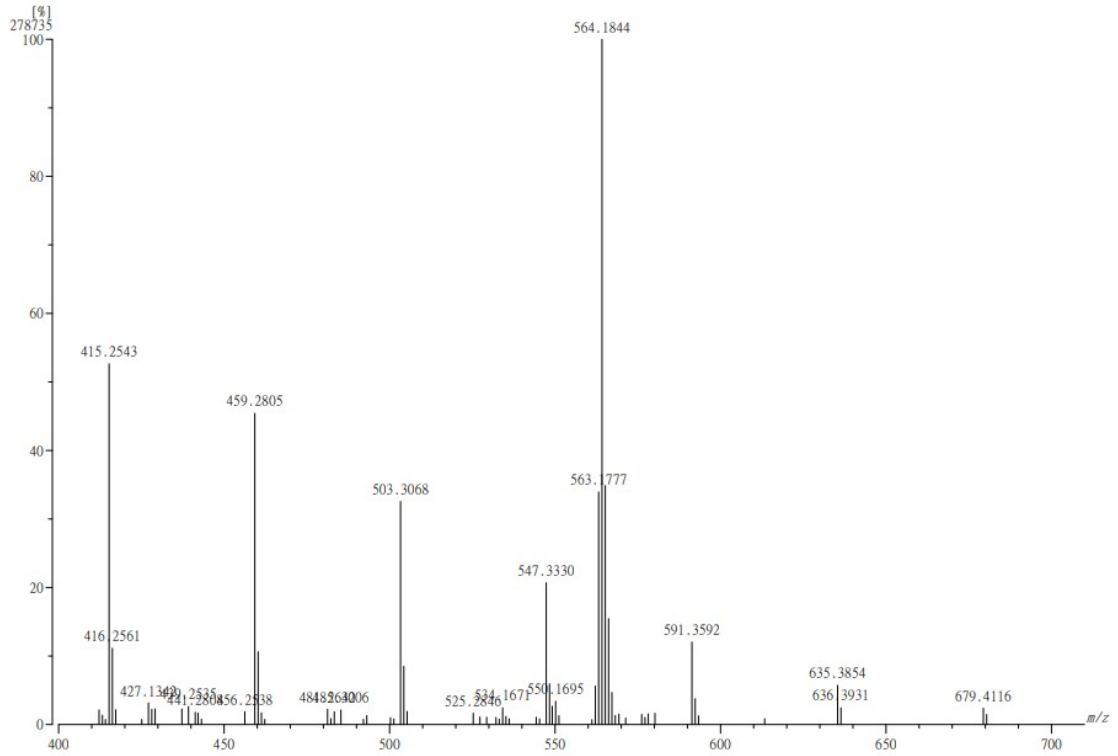

# MS spectrum of 6 (KR-27335)

[ Mass Spectrum ]  
Data : 5-17-015 Date : 17-May-2023 14:57  
Instrument : MStation  
Sample : KR-27335  
Note :  
Inlet : Direct Ion Mode : EI+  
Spectrum Type : Normal Ion [MF-Linear]  
RT : 2.77 min Scan# : 84 Temp : 3276.7 deg.C  
BP : m/z 375.0339 Int. : 90.28 (946687)  
Output m/z range : 282 to 570 Cut Level : 0.00 %

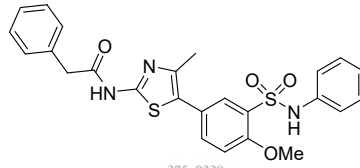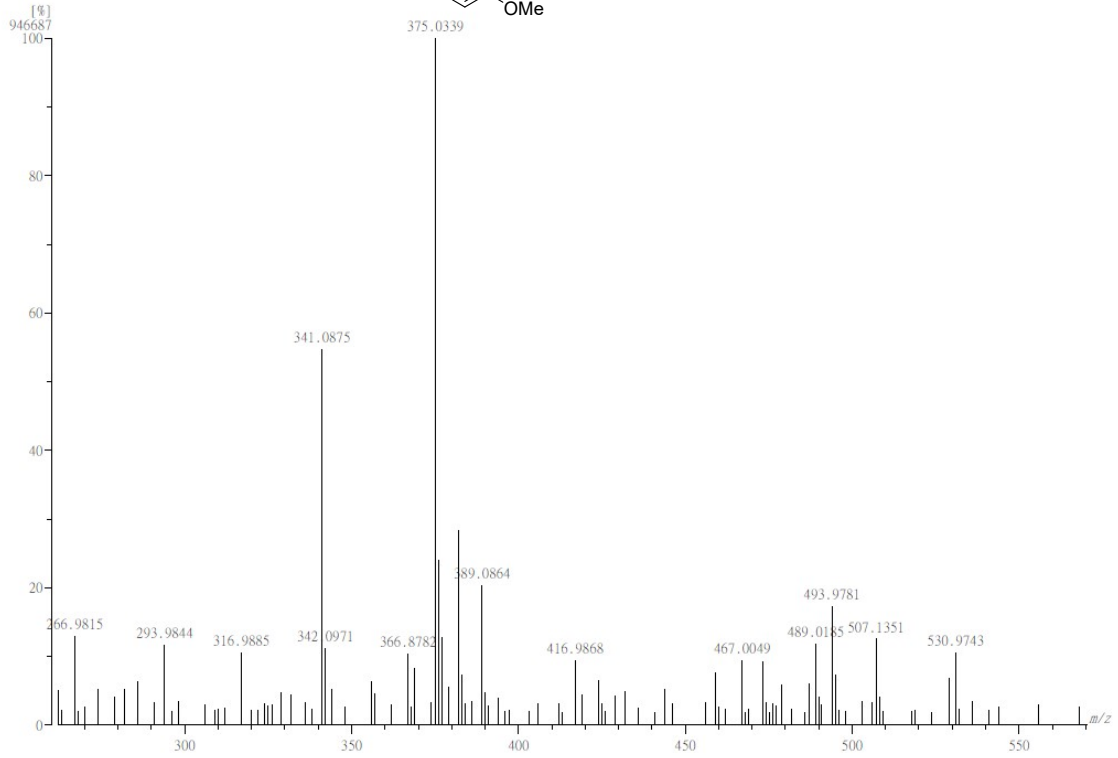

# MS spectrum of 7a (KR-27336)

[ Mass Spectrum ]  
Data : 5-17-018 Date : 17-May-2023 15:12  
Instrument : MStation  
Sample : KR-27336  
Note :  
Inlet : Direct Ion Mode : E1+  
Spectrum Type : Normal Ion [MF-Linear]  
RT : 2.87 min Scan# : 87 Temp : 3276.7 deg.C  
BP : m/z 375.0759 Int. : 441.77 (4632319)  
Output m/z range : 150 to 800 Cut Level : 0.00 %

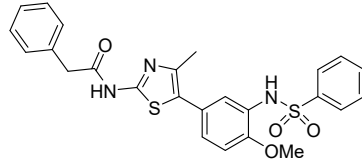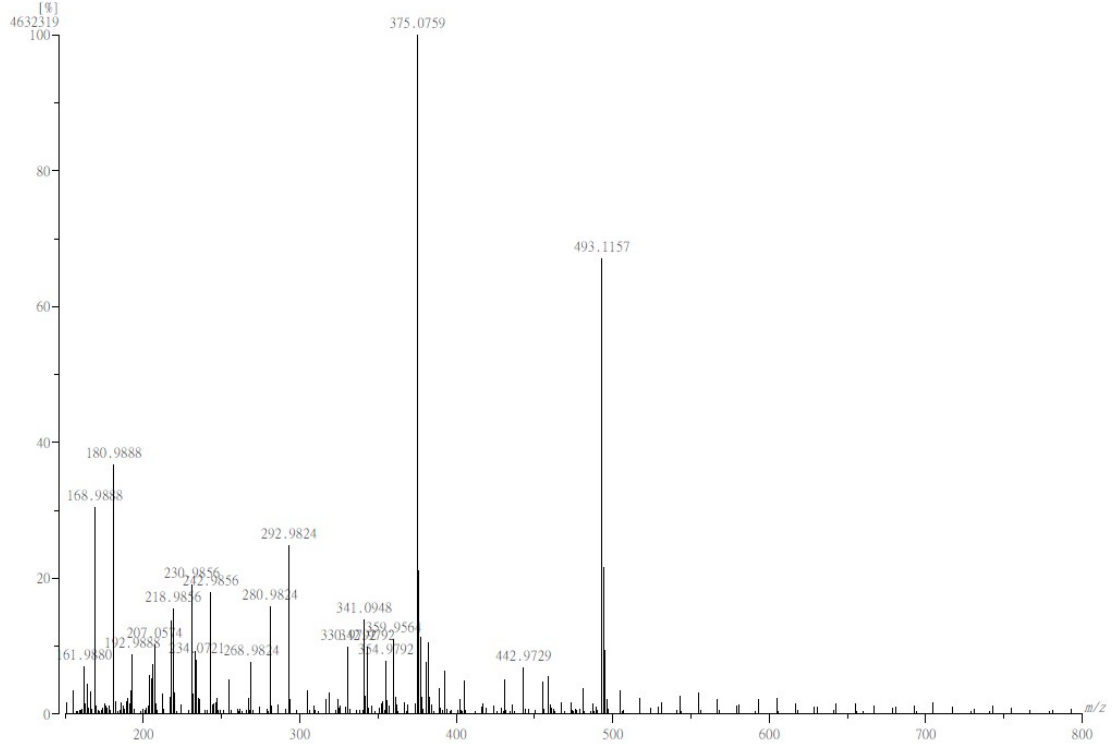

# MS spectrum of 7b (KR-27376)

[ Mass Spectrum ]  
Data : 5-17-017 Date : 17-May-2023 15:34  
Instrument : MStation  
Sample : KR-27376  
Note :  
Inlet : Direct Ion Mode : EI+  
Spectrum Type : Normal Ion [MF-Linear]  
RT : 2.84 min Scan# : 86 Temp : 3276.7 deg.C  
BP : m/z 511.1029 Int. : 69.41 (727807)  
Output m/z range : 150 to 800 Cut Level : 0.00 %

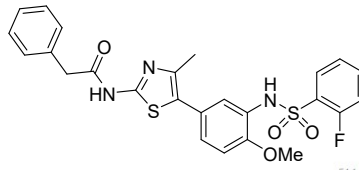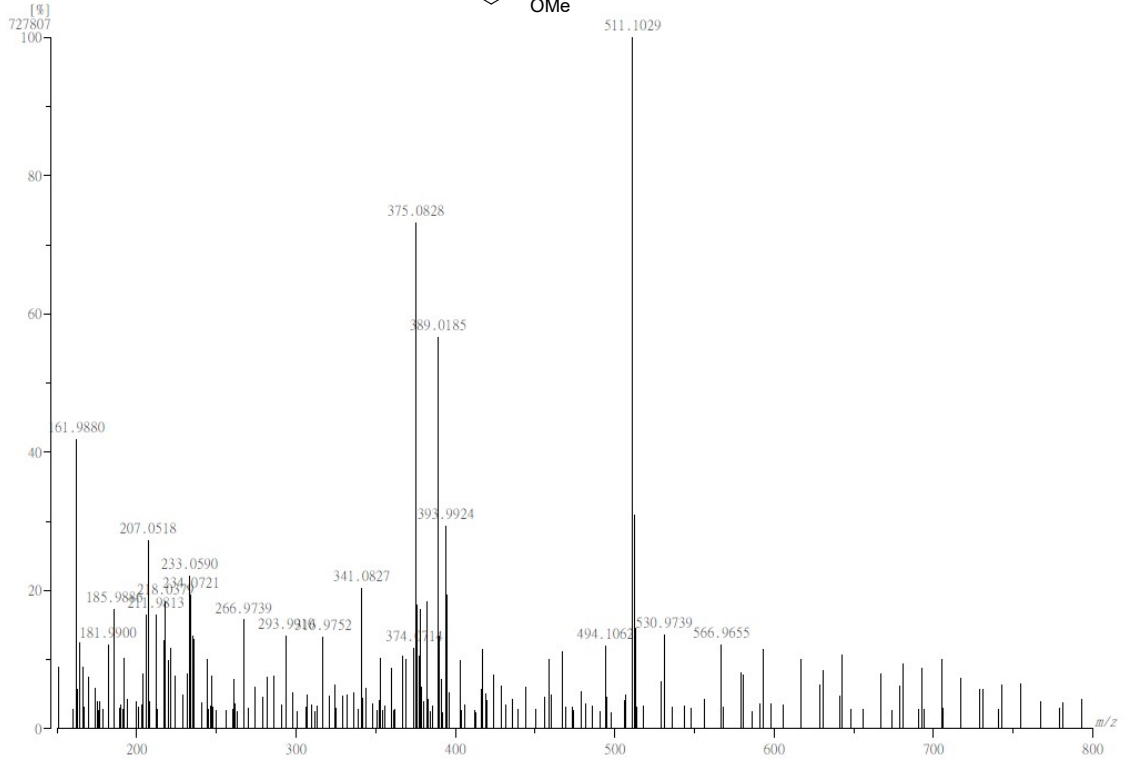

# MS spectrum of 7c (KR-27377)

[ Mass Spectrum ]  
Data : 5-17-019 Date : 17-May-2023 15:47  
Instrument : MStation  
Sample : KR-27377  
Note :  
Inlet : Direct Ion Mode : EI+  
Spectrum Type : Normal Ion [MF-Linear]  
RT : 2.30 min Scan# : 70 Temp : 3276.7 deg.C  
BP : m/z 511.1030 Int. : 586.30 (6147839)  
Output m/z range : 150 to 800 Cut Level : 0.00 %

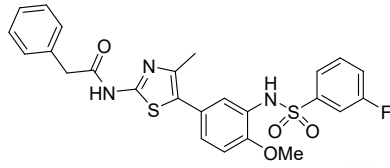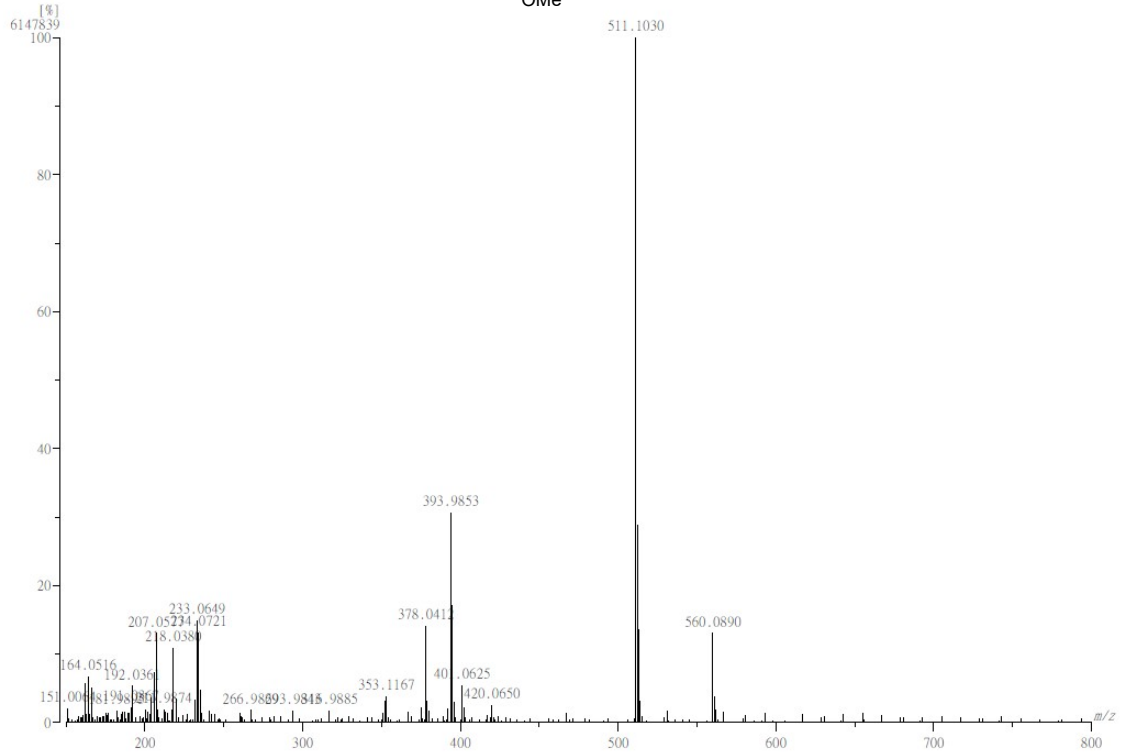



# MS spectrum of 7d (KR-27374)

[ Mass Spectrum ]  
Data : 5-17-020 Date : 17-May-2023 16:00  
Instrument : MStation  
Sample : KR-27374  
Note :  
Inlet : Direct Ion Mode : E+  
Spectrum Type : Normal Ion [MF-Linear]  
RT : 2.84 min Scan# : 86 Temp : 3276.7 deg.C  
BP : m/z 511.1038 Int. : 253.37 (2656767)  
Output m/z range : 150 to 800 Cut Level : 0.00 %

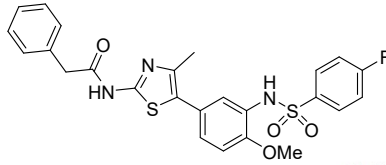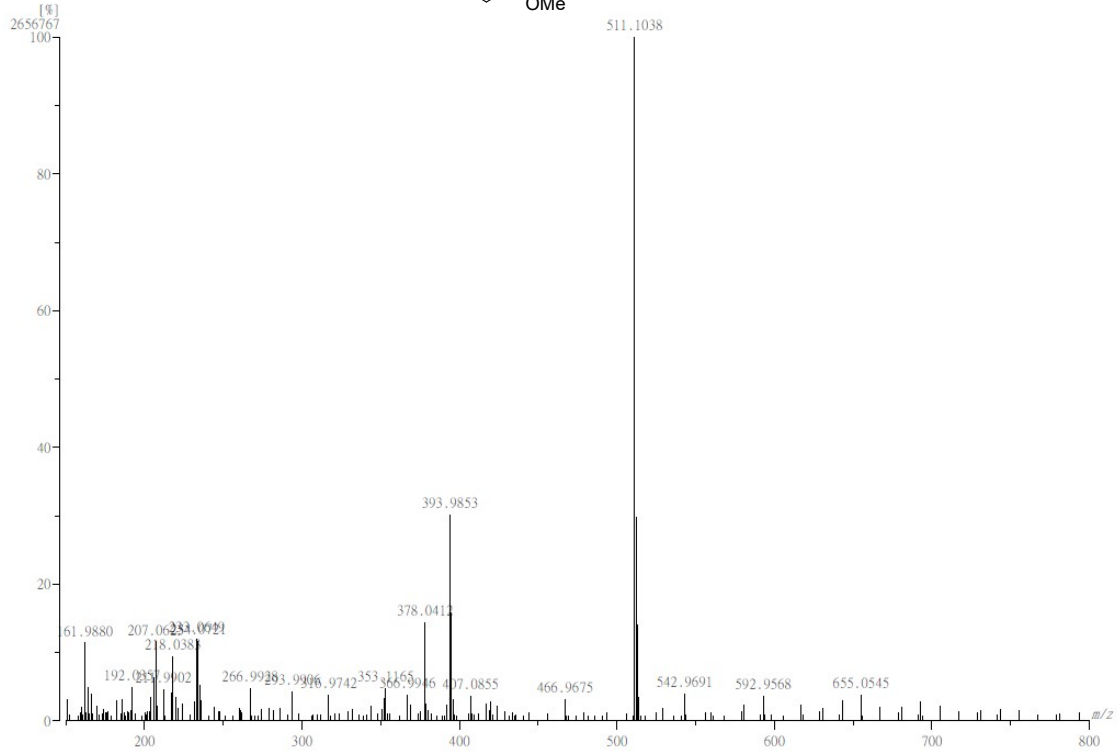

# MS spectrum of 7e (KR-27375)

[ Mass Spectrum ]  
Data : 5-17-021 Date : 17-May-2023 16:14  
Instrument : MStation  
Sample : KR-27375  
Note :  
Inlet : Direct Ion Mode : EI+  
Spectrum Type : Normal Ion [MF-Linear]  
RT : 2.67 min Scan# : 81 Temp : 3276.7 deg.C  
BP : m/z 376.0619 Int. : 315.48 (3308031)  
Output m/z range : 150 to 800 Cut Level : 0.00 %

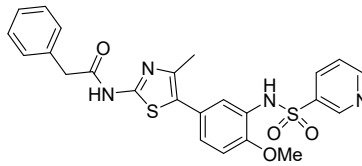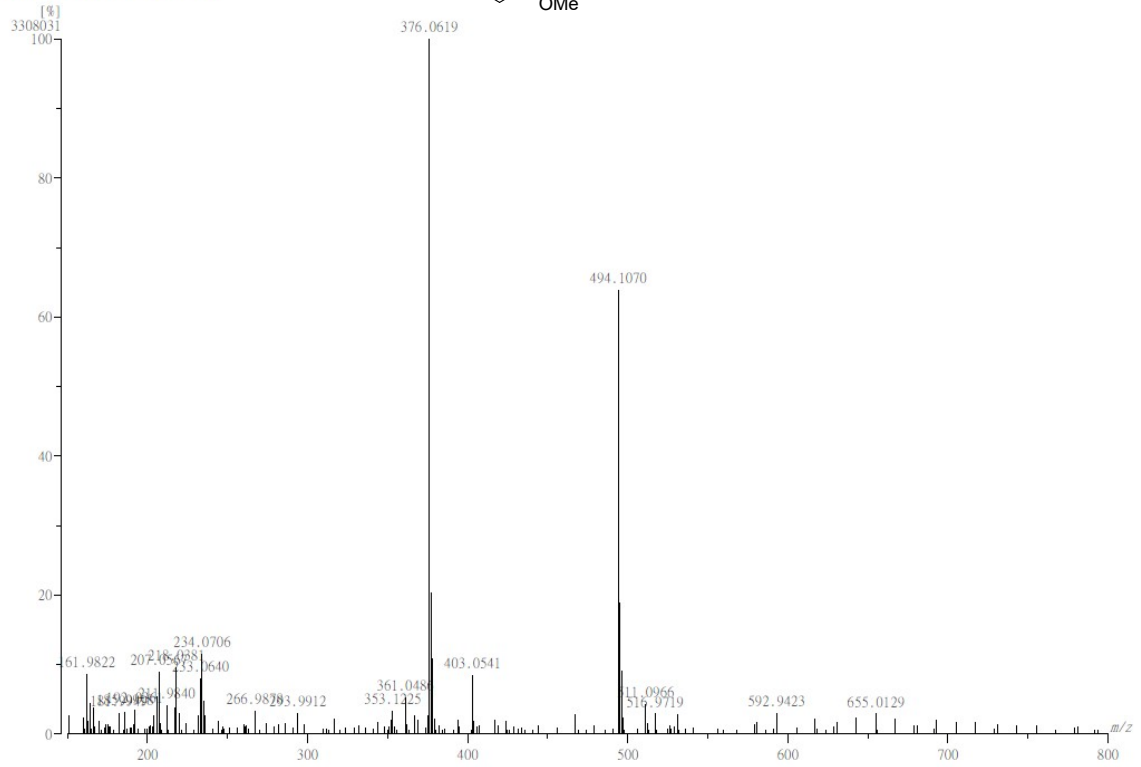

# MS spectrum of 7f (KR-27370)

[ Mass Spectrum ]  
Data : 5-17-022 Date : 17-May-2023 16:26  
Instrument : MStation  
Sample : KR-27370  
Note :  
Inlet : Direct Ion Mode : EI+  
Spectrum Type : Normal Ion [MF-Linear]  
RT : 3.70 min Scan# : 112 Temp : 3276.7 deg.C  
BP : m/z 375.0774 Int. : 118.12 (1238527)  
Output m/z range : 150 to 800 Cut Level : 0.00 %

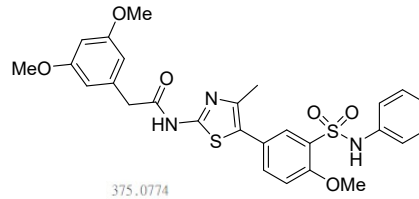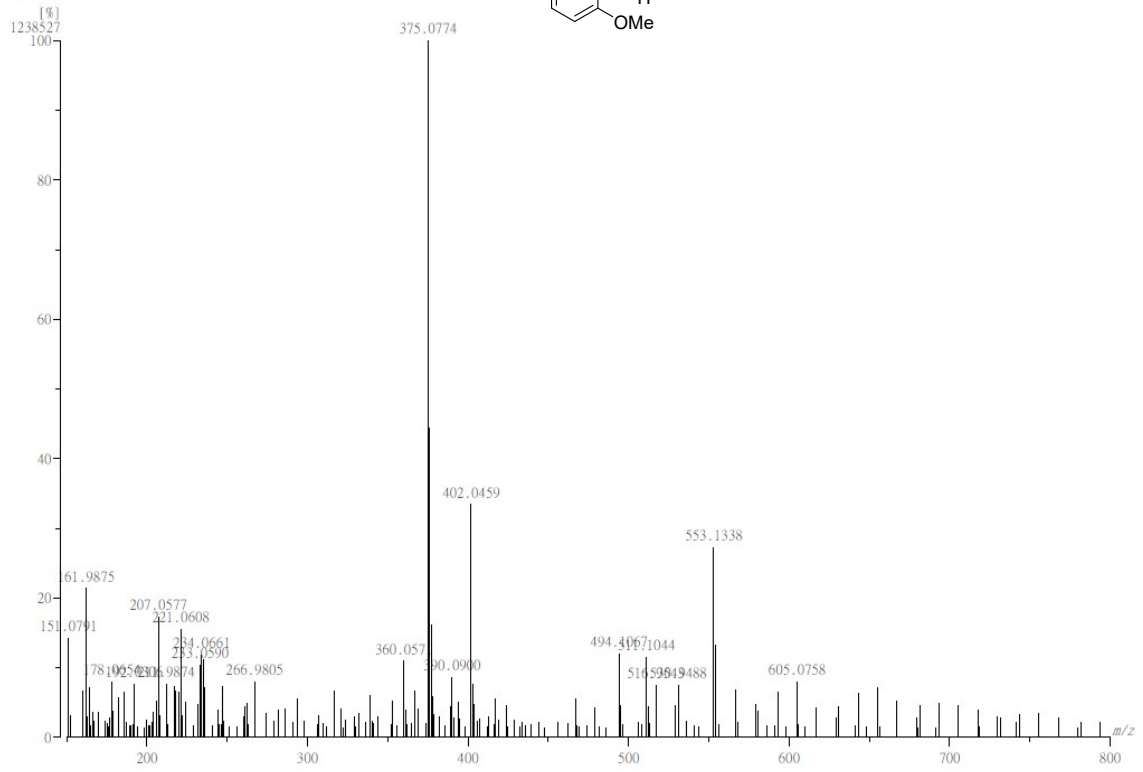

## S4. Antiviral activity of 7f against coronavirus<sup>a</sup>

**Table.**

| Virus             | Cells   | CC <sub>50</sub> (μM) <sup>b</sup> | EC <sub>50</sub> (μM) <sup>c</sup> | SI <sup>d</sup> |
|-------------------|---------|------------------------------------|------------------------------------|-----------------|
| Alpha coronavirus |         |                                    |                                    |                 |
| HCoV-229E         | MRC5    | 5.8                                | >5.8                               | -               |
| HCoV-NL63         | LLC-MK2 | >100                               | >100                               | -               |
| FIPv              | CRFK    | >100                               | >100                               | -               |
| Beta Coronavirus  |         |                                    |                                    |                 |
| HCoV-OC43         | MRC5    | 5.8                                | >5.8                               | -               |
| SARS-CoV-2        | Vero    | >100                               | >100                               | -               |

<sup>a</sup>All data were obtained from at least two independent experiments, and the mean values ± standard deviations are listed. <sup>b</sup>CC<sub>50</sub>: Cytotoxic concentration (μM) for 50% cell survived, measured by MTT assay. <sup>c</sup>EC<sub>50</sub>: Effective concentration (μM) for 50% inhibition of each virus species, measured by MTT assay. <sup>d</sup>SI: Selectivity index calculated using CC<sub>50</sub>/EC<sub>50</sub>. <sup>e</sup>Not calculated because the EC<sub>50</sub> was higher than CC<sub>50</sub>

## S5. Kinase assay

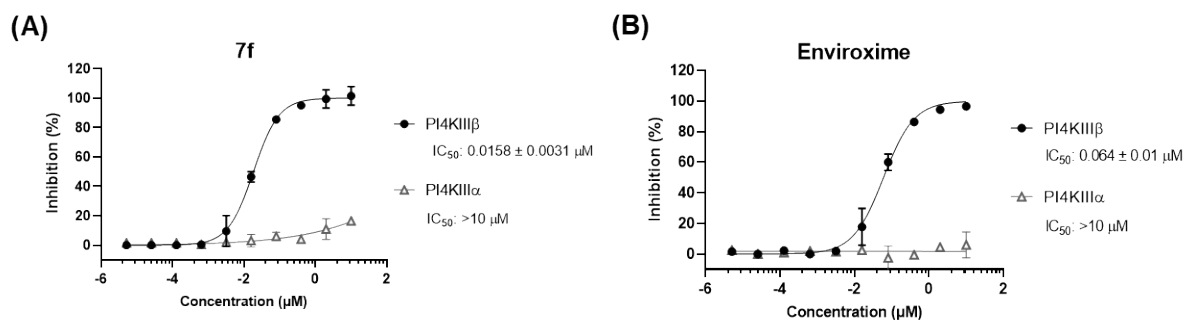

**Figure.** GST-PI4KIII  $\alpha$ ,  $\beta$  (Invitrogen, Waltham, MA, USA), and PI:PS lipid kinase substrate (Invitrogen) were diluted in Kinase buffer T (Invitrogen). The enzymatic activity of PI4Ks was determined using an ADP-Glo kinase assay kit. Dose-responses of PI4KIII $\alpha$  (open triangle) and PI4KIII $\beta$  (black circle) in the presence of serially diluted concentrations of **7f** (A) and enviroxime (B). Data represent means ( $\pm$ SD) of at least two dependent experiments performed in duplicate.

# S6. Kinase panel assay

(A)

## KR-27370 @ 1 $\mu$ M, Kinase panel assay (1)

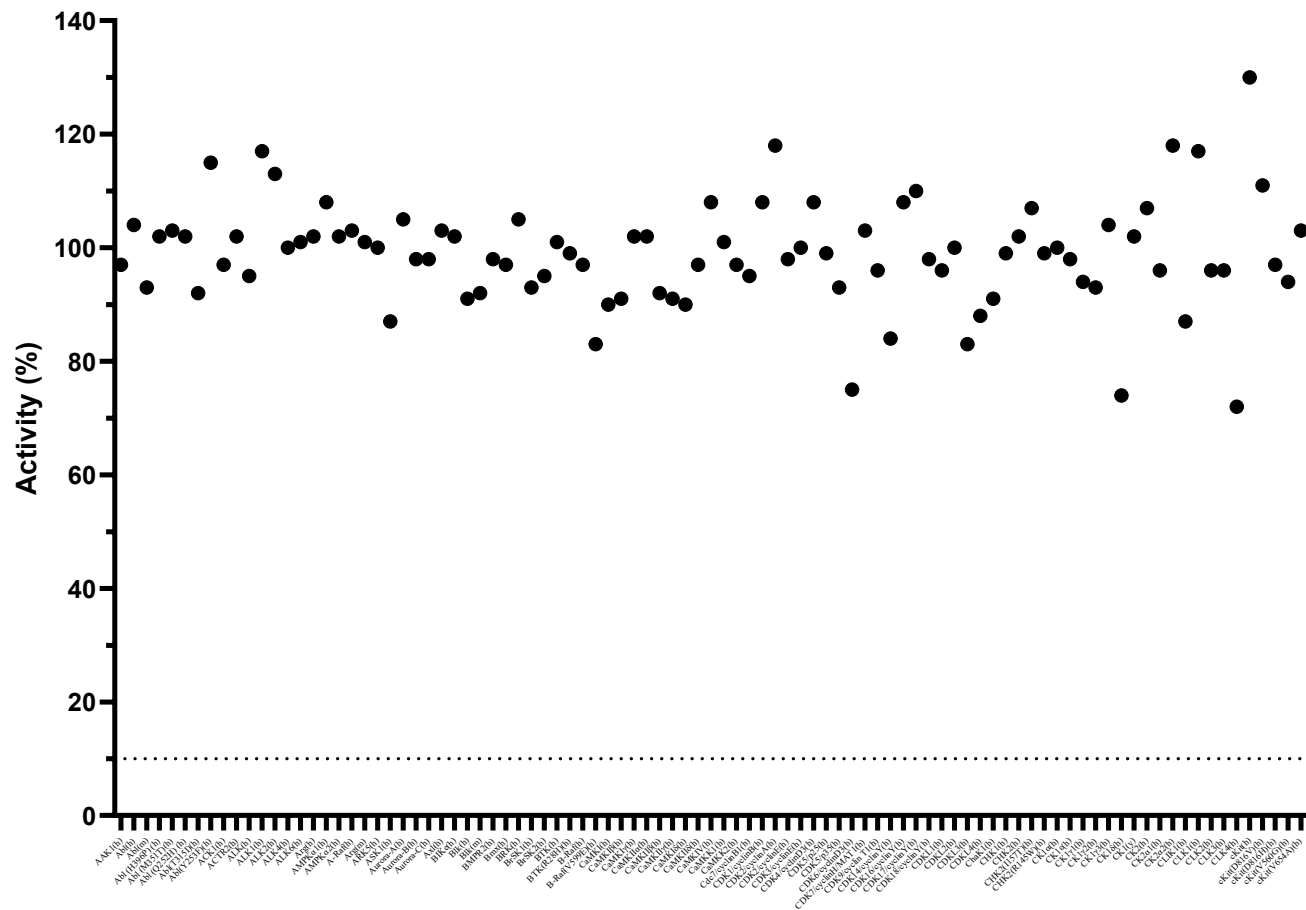

# KR-27370 @ 1 $\mu$ M, Kinase panel assay (2)

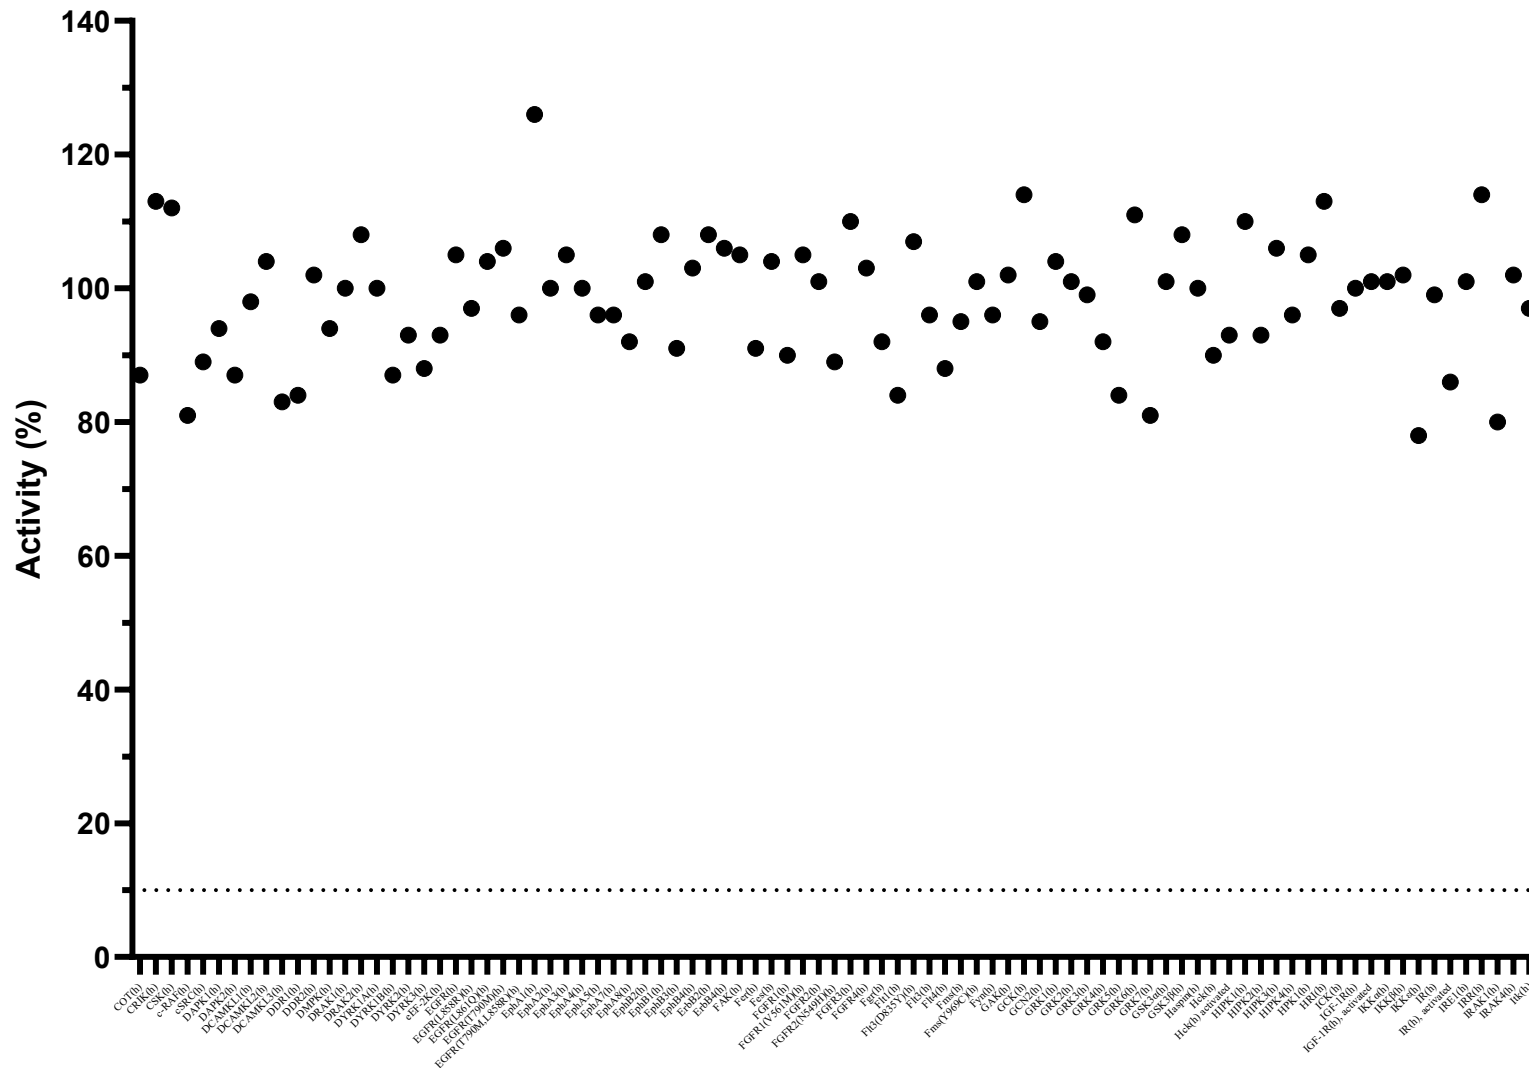





# KR-27370 @ 1 $\mu$ M, Kinase panel assay (4)

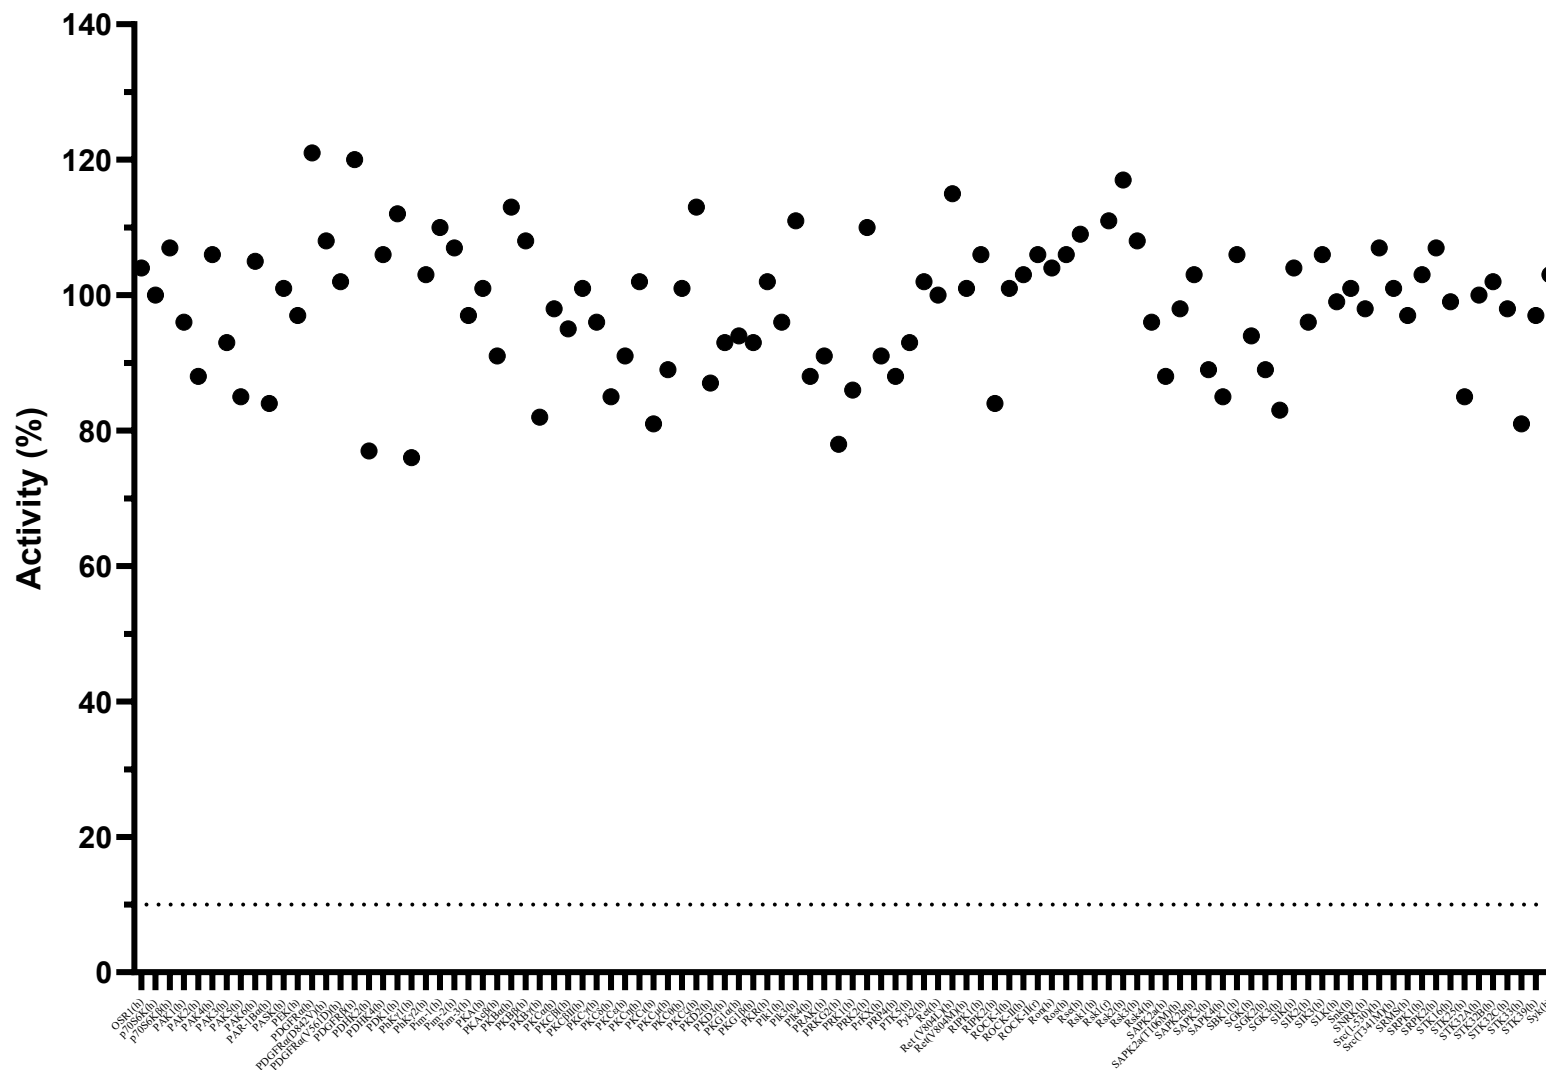

### KR-27370 @ 1 $\mu$ M, Kinase panel assay (5)

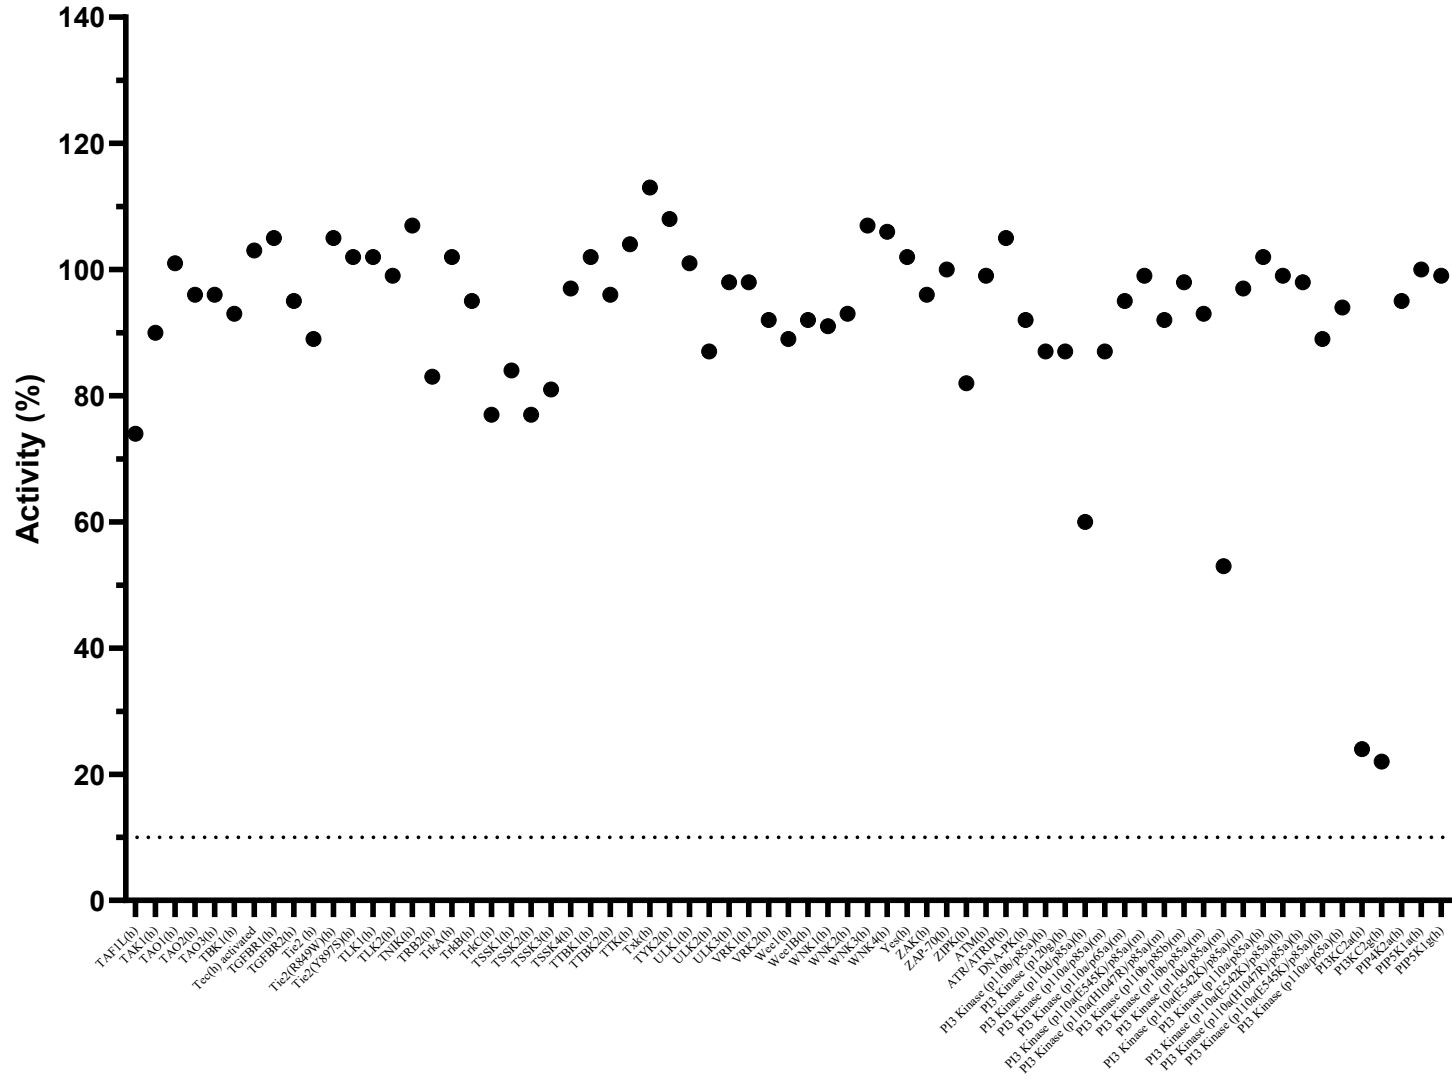

(B)

KR-27370 @ 1 $\mu$ M, Kinase panel assay

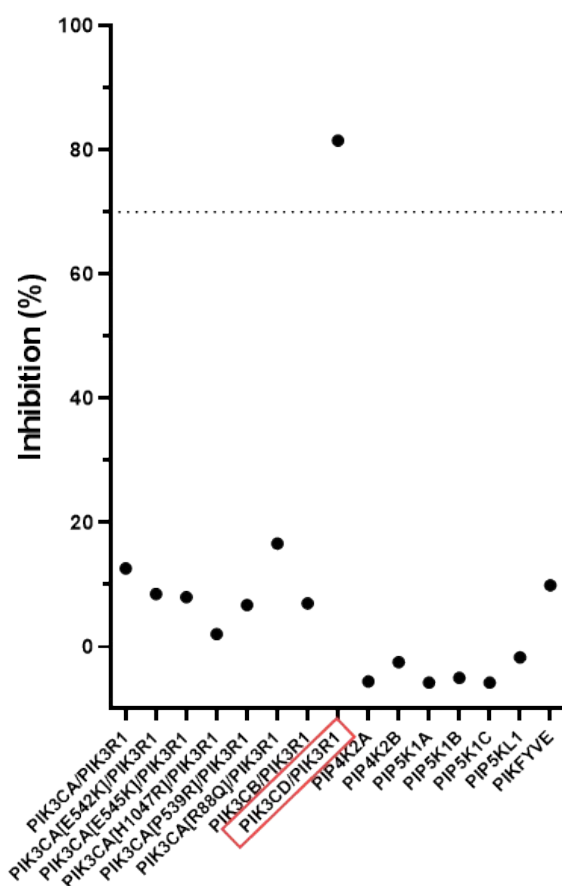

**Figure.** (A) **7f** was tested 435 protein kinases analysis by Eurofins. A Results of 30% or below was established as an inhibitor of the test kinases (PI3KC2 $\alpha$ , PI3KC2 $\gamma$ ). (B) **7f** was tested 15 protein kinases analysis by Carna biosciences. A Results of 70% or above was established as an inhibitor of the test kinases (PIK3CD/PIK3R1).
